# Supplementary material
Source: PubMed Central journal article supplement (PMC6486341)
Supplement: jci-129-125917-s151.pdf [file jci-129-125917-s151.pdf]

Supplementary Figures:

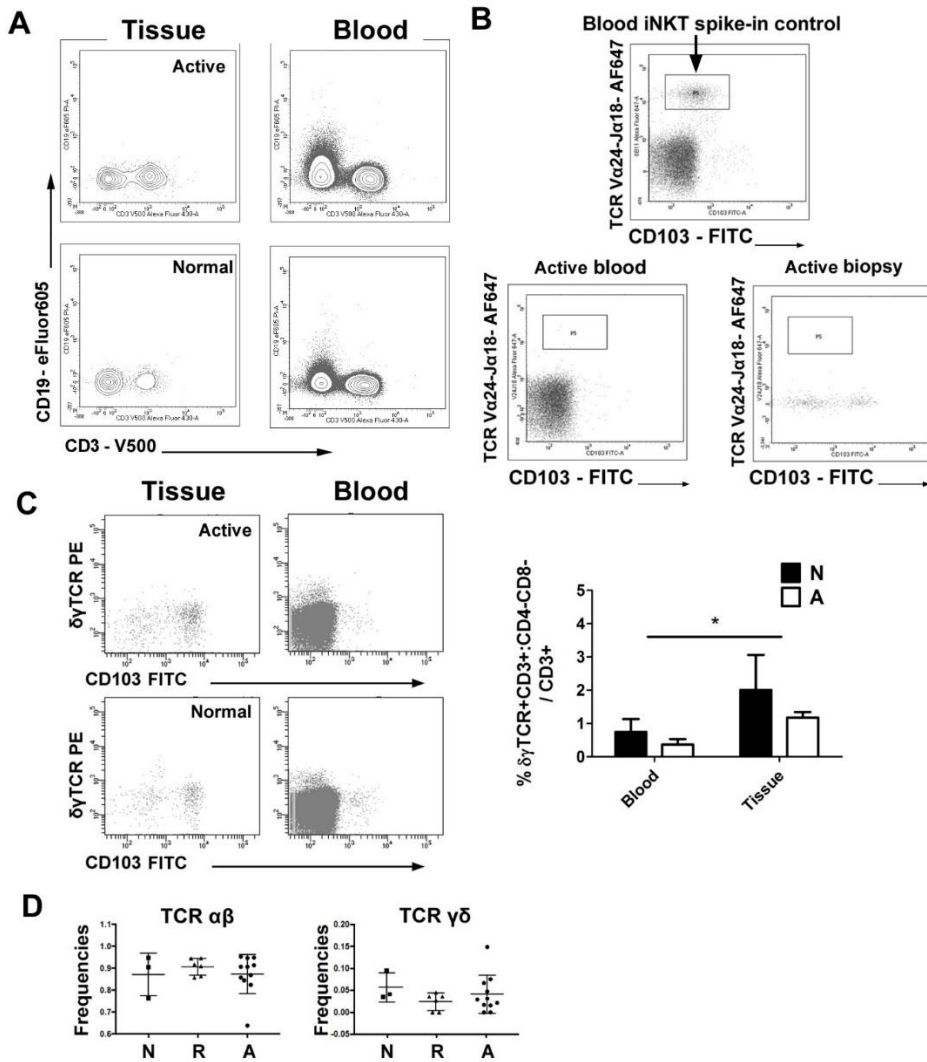

**S Figure 1. Cellular and molecular presence of B cells, iNKT cells, and  $\delta\gamma$ TCR T cells in allergic inflammatory tissue.**

A, CD45+ events isolated from biopsy tissue and autologous blood were gated and double-plotted for CD19 (for B cells) and CD3 (for T cells) in the context of normal (N) and active disease (A). B, Cellular presence of iNKT cells, identified by the invariant TCR Va24-Ja18, as assessed in active disease biopsy and autologous blood tissue, with a spike-in of the iNKT cell line (upper panel) as the positive staining control. C, The % CD4 frequency of  $\delta\gamma$ T cells was assessed by FACS (anti- $\delta\gamma$ TCR staining) in the context of normal vs. active disease. D, The frequencies of  $\delta\gamma$ T cells were also assessed by extracting the entire TCR sequence pool from scRNA-seq of the 1088 tissue T cells, followed by computerized enumeration. N, normal; R, remission; A, active EoE.

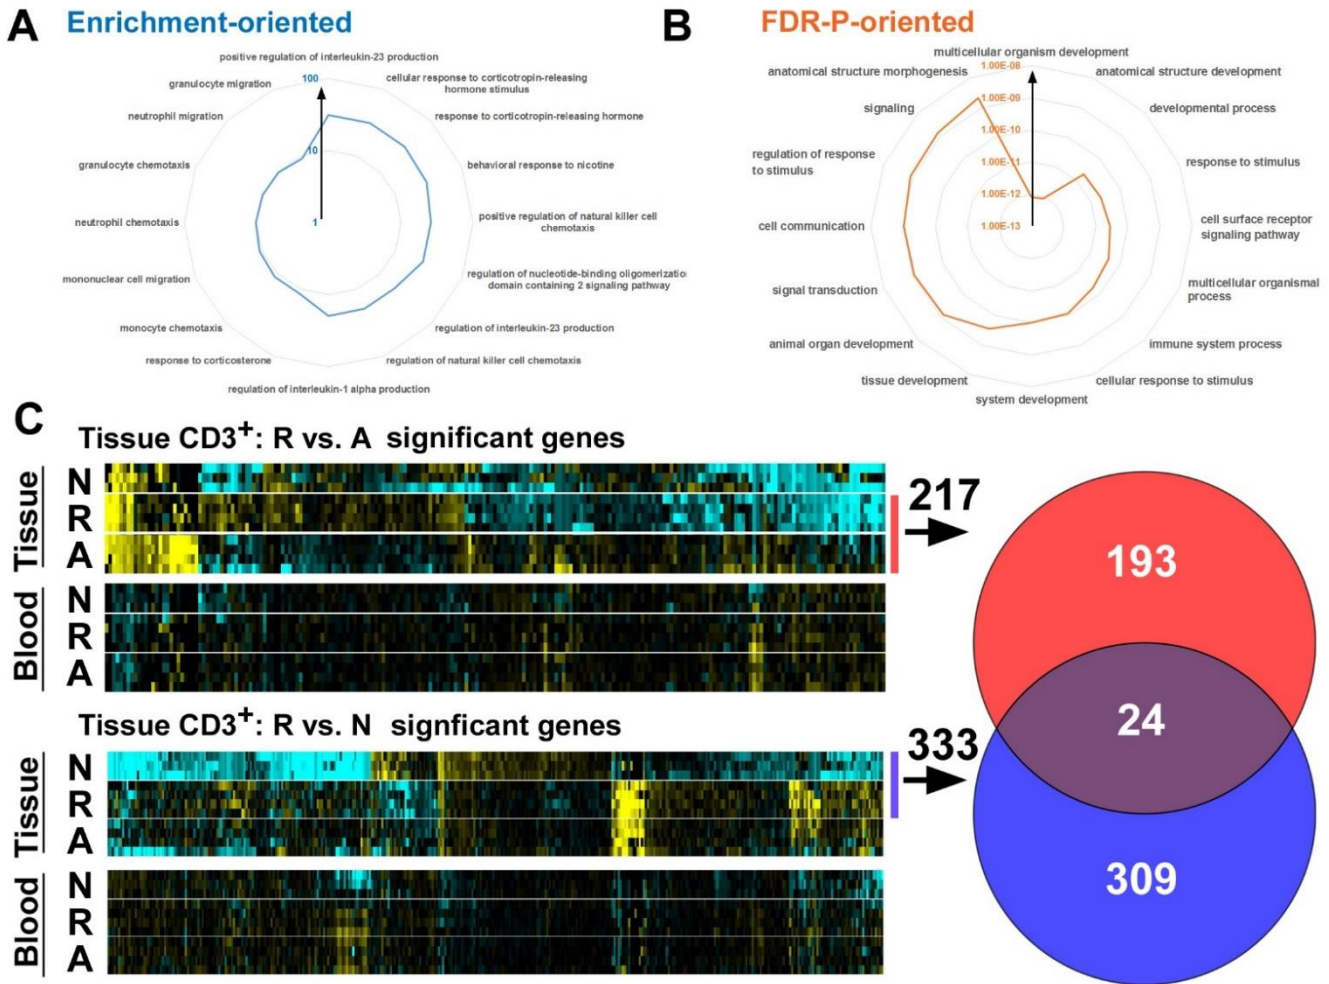

**S Figure 2. Gene ontology analysis of the tissue lymphocyte-specific genes in disease context.**

The full list of GO function nodes shown with two approaches, namely enrichment priority (A) and FDR-adjusted p value priority (B), with the radar scanning map representing the top contributing biofunction nodes derived from the 331 tissue-specific genes. C, The signatures of remission (R) tissue lymphocytes signature were compared to those of active (A) and normal (N) tissue lymphocytes genome wide (Mann-Whitney test, FDR-adjusted  $p < 0.05$ , fold change  $> 2$ ), resulting in 217 and 333 significant genes, respectively. Heat maps in the context of all tissue and disease activities types were shown. The Venn gram for overlapping genes between the two cohorts were exhibited on the right. The gene lists were exhibited in Table S4 A and B.

**A**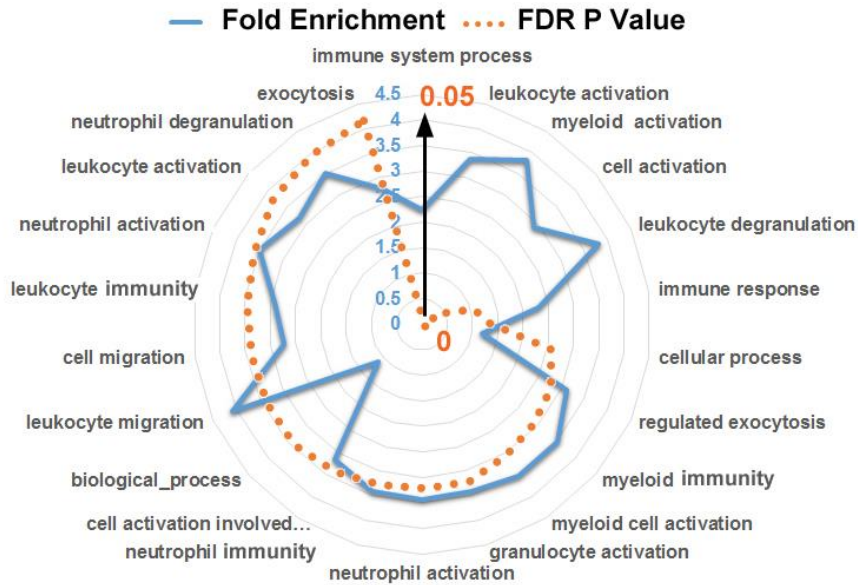**B**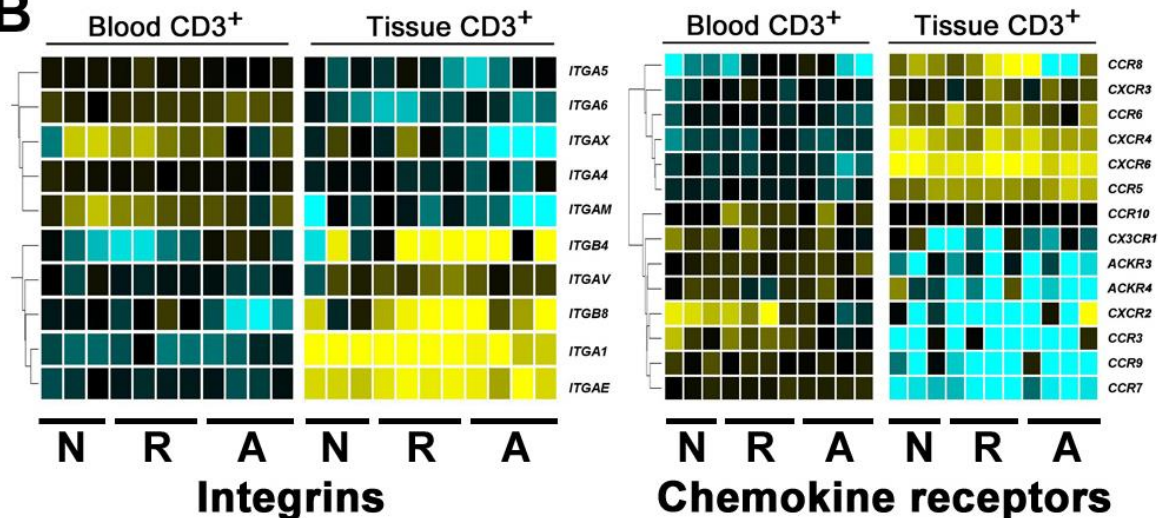

**S Figure 3. Ontology analysis of tissue T cells in disease context and integrin/chemokine receptor comparison in tissue context.**

A, Focusing on the 150 dysregulated genes shown in the volcano plot (147 being upregulated in CD3<sup>+</sup> cells from patients with active allergic inflammation), major gene ontology (GO) functional nodes are shown on the radar scanning map. The blue radar indicates the fold change in GO enrichment, whereas the orange radar shows the FDR-adjusted p value of the given nodes. B, A set of 14 out of 23 chemokine receptors and 10 out of 27 integrin (subunit) genes are significantly different between blood and tissue as shown by the heat diagrams (2-way ANOVA; FDR-adjusted  $p < 0.05$ ). Disease status illustrated as, N, normal, R, remission and A, active EoE.

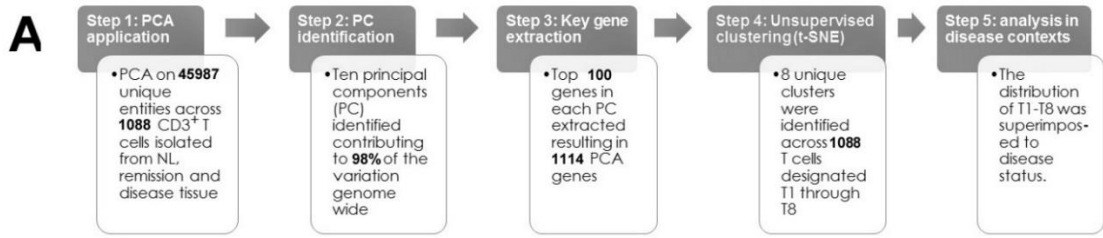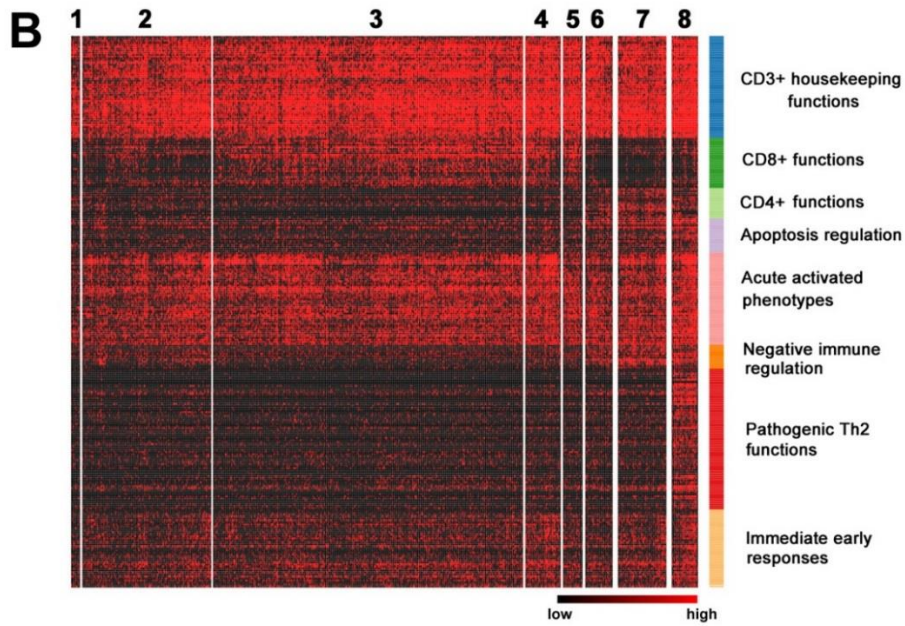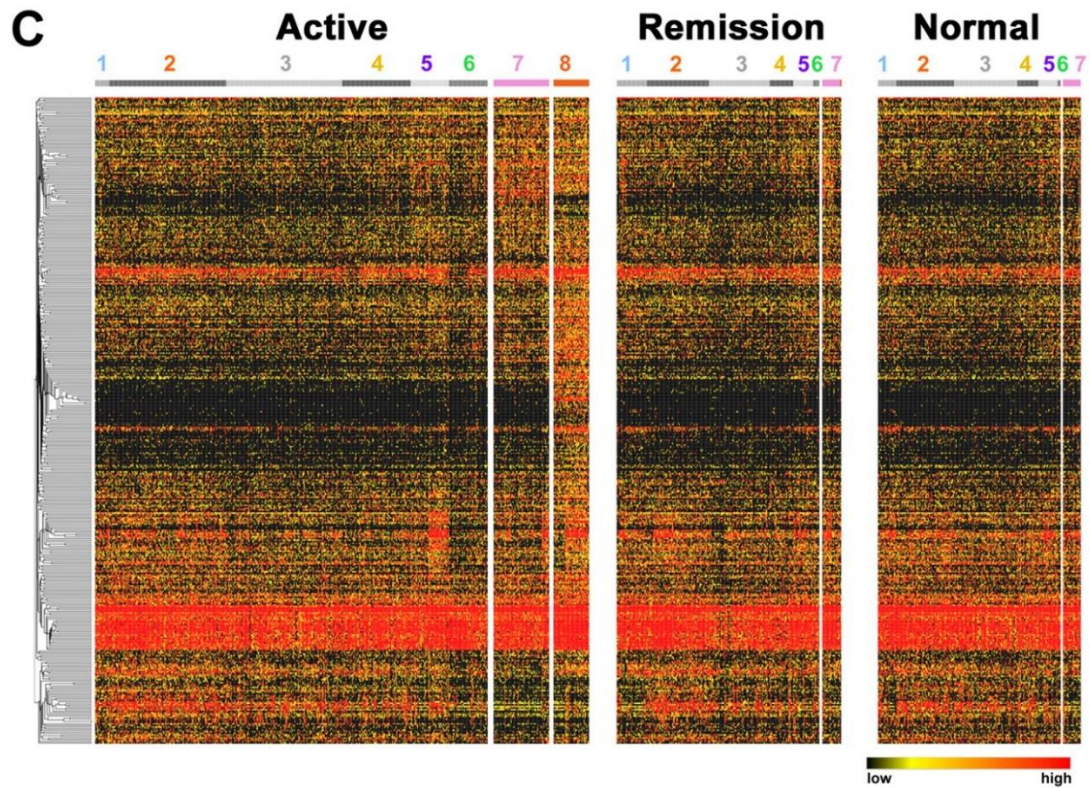

**S Figure 4. Genetic interrogation of the expression phenotypes of T1-T8.** A, A pipeline for dimensionality reduction of the genome-wide scRNA-seq data to obtain principal component (PC) genes defining T cells subsets using principal component analysis (PCA). B, Heatmap indicating the genetic separation of T1-T8 by the 1,114 PCA genes, with brief GO annotation of major gene clusters juxtaposed. C, The heatmap of the 1088 T cells stratified on disease activity based on the 1114 core genes identified by PCA. Within each disease activity bin, the T cell classification grouping is illustrated, also serving as absolute cell counters for each cluster. T7 and T8 are separately spaced to emphasize their activated transcriptome phenotype and specific overrepresentation in the cohort with active EoE.

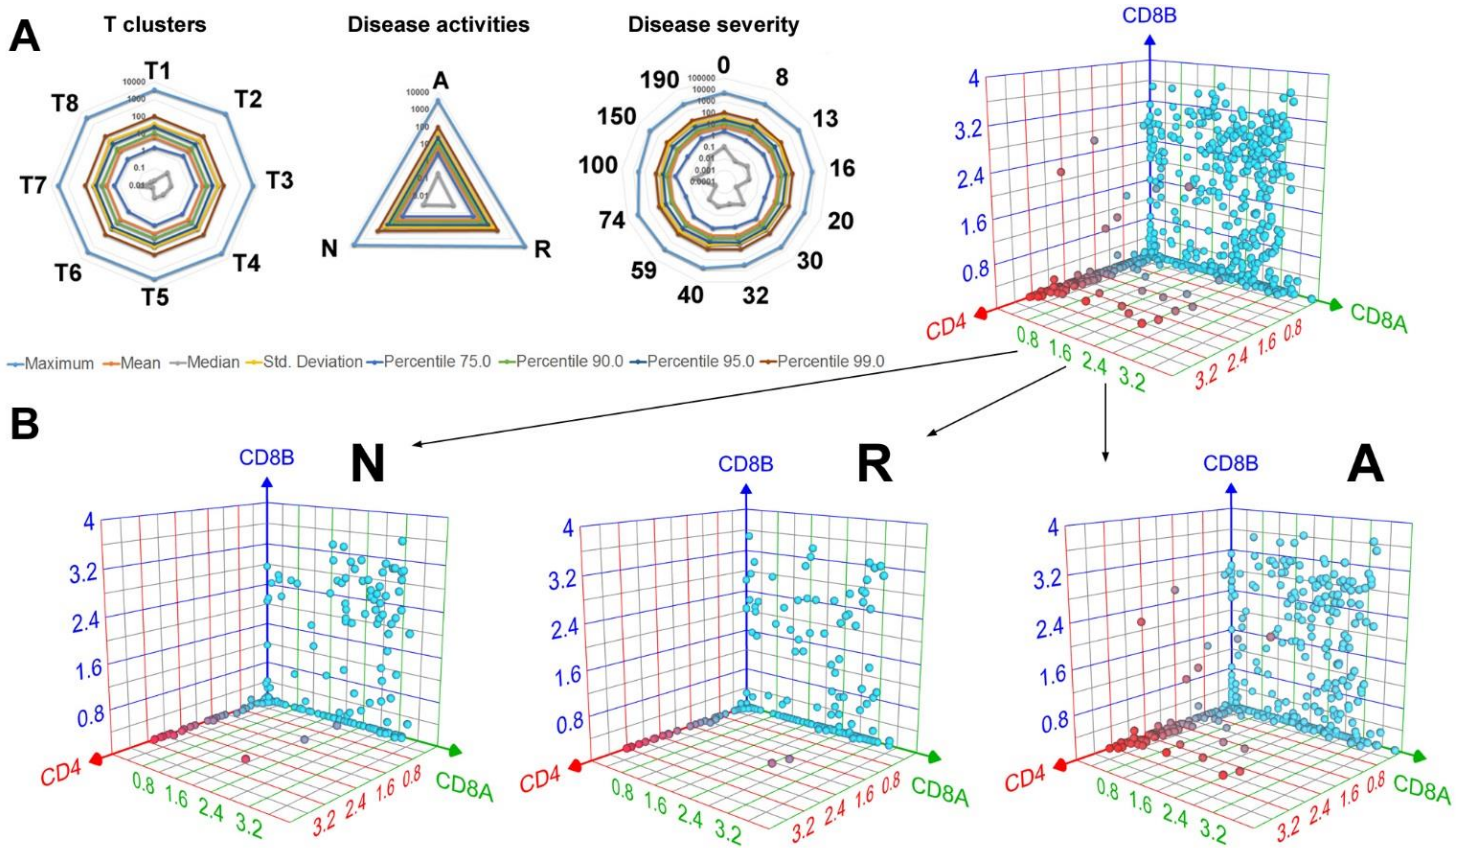

**S Figure 5. Overall expression topology in the contexts of T1-T8, disease condition and severity, and CD8 dimerization component analyses.**

A, Global assessment of overall genome wide expression profiles. The non-supervised (genome-wide) expression percentile were graphed as a function of the unique T1-T8 clusters, disease activities and level of esophageal eosinophilia in the unit of RPKMs. Radar plots show the RPKM percentile gradient showing the overall expression abundancy for each parameter. B, On the basis of the expression RPKMs of CD4 and the two CD8 monomers, *CD8A*, and *CD8B*, the topology of all 1088 tissue T cells were collectively exhibited in a 3-D plot (top panel, pivoting animation), which were subsequently broken down to 3 disease activities to visually reveal their individual presence (N, normal; R, remission; A, active). Each dot represents a single T cell, and the system is heat labeled on x axis (CD4) to indicate presence of the CD4 component.

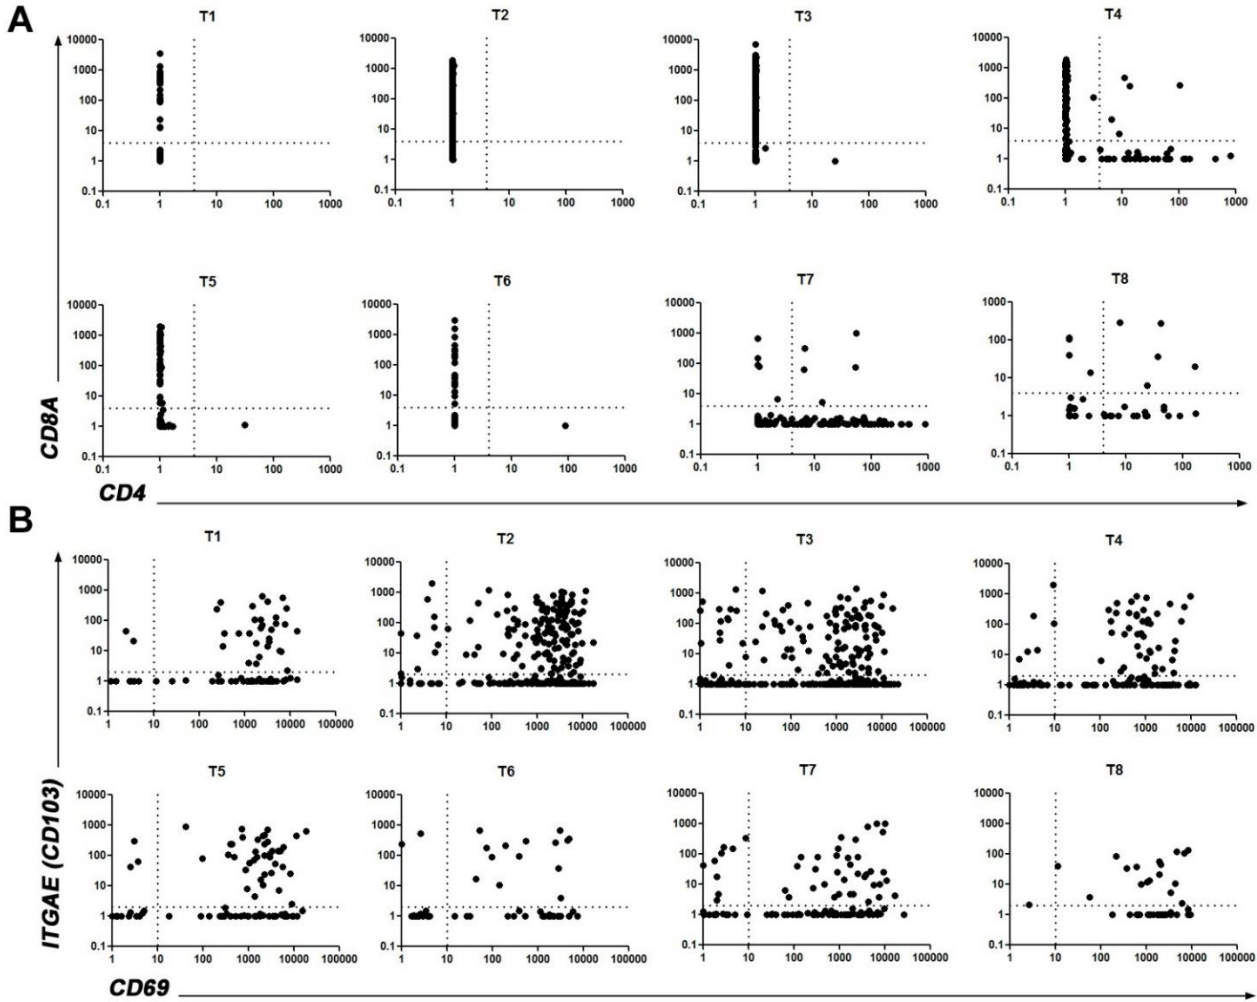

**S Figure 6. CD4-CD8 and  $T_{RM}$  topology analyses of T1-T8 clusters**

The CD4-CD8A distribution plots (A) and *CD69-ITGAE (CD103)* distribution plots (B) of T1-T8 are shown to illustrate their CD4-CD8A cellularity and tissue-resident memory T cell ( $T_{RM}$ ) distribution, respectively. All cells were included without disease context, and each dot represents a single T cell.

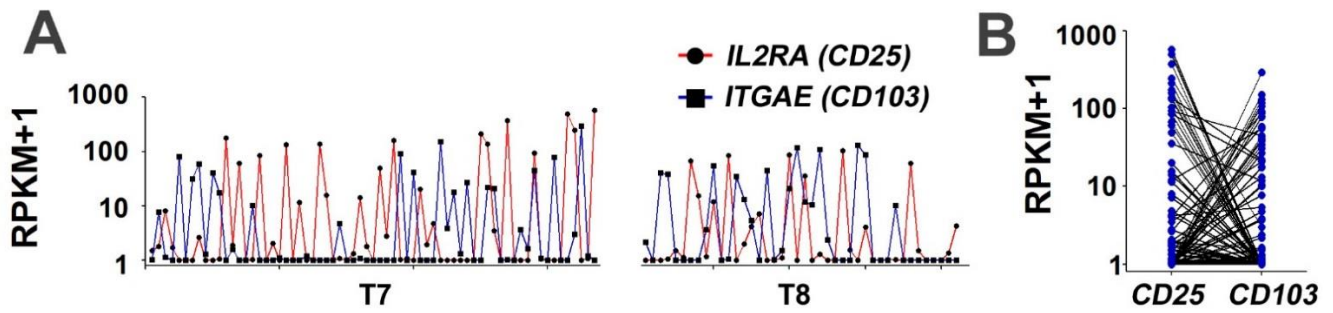

**S Figure 7. The mutually exclusive pattern of CD103 and CD25 in T7 and T8**

A, T7 and T8 cells were analyzed for their expression of CD25 and CD103 at the single-cell level with each data point representing a single cell. B, With each line (pairing two blue dots) representing a single T7/T8 cell, the single-cell level of CD25 and CD103 are shown with the blue data points.



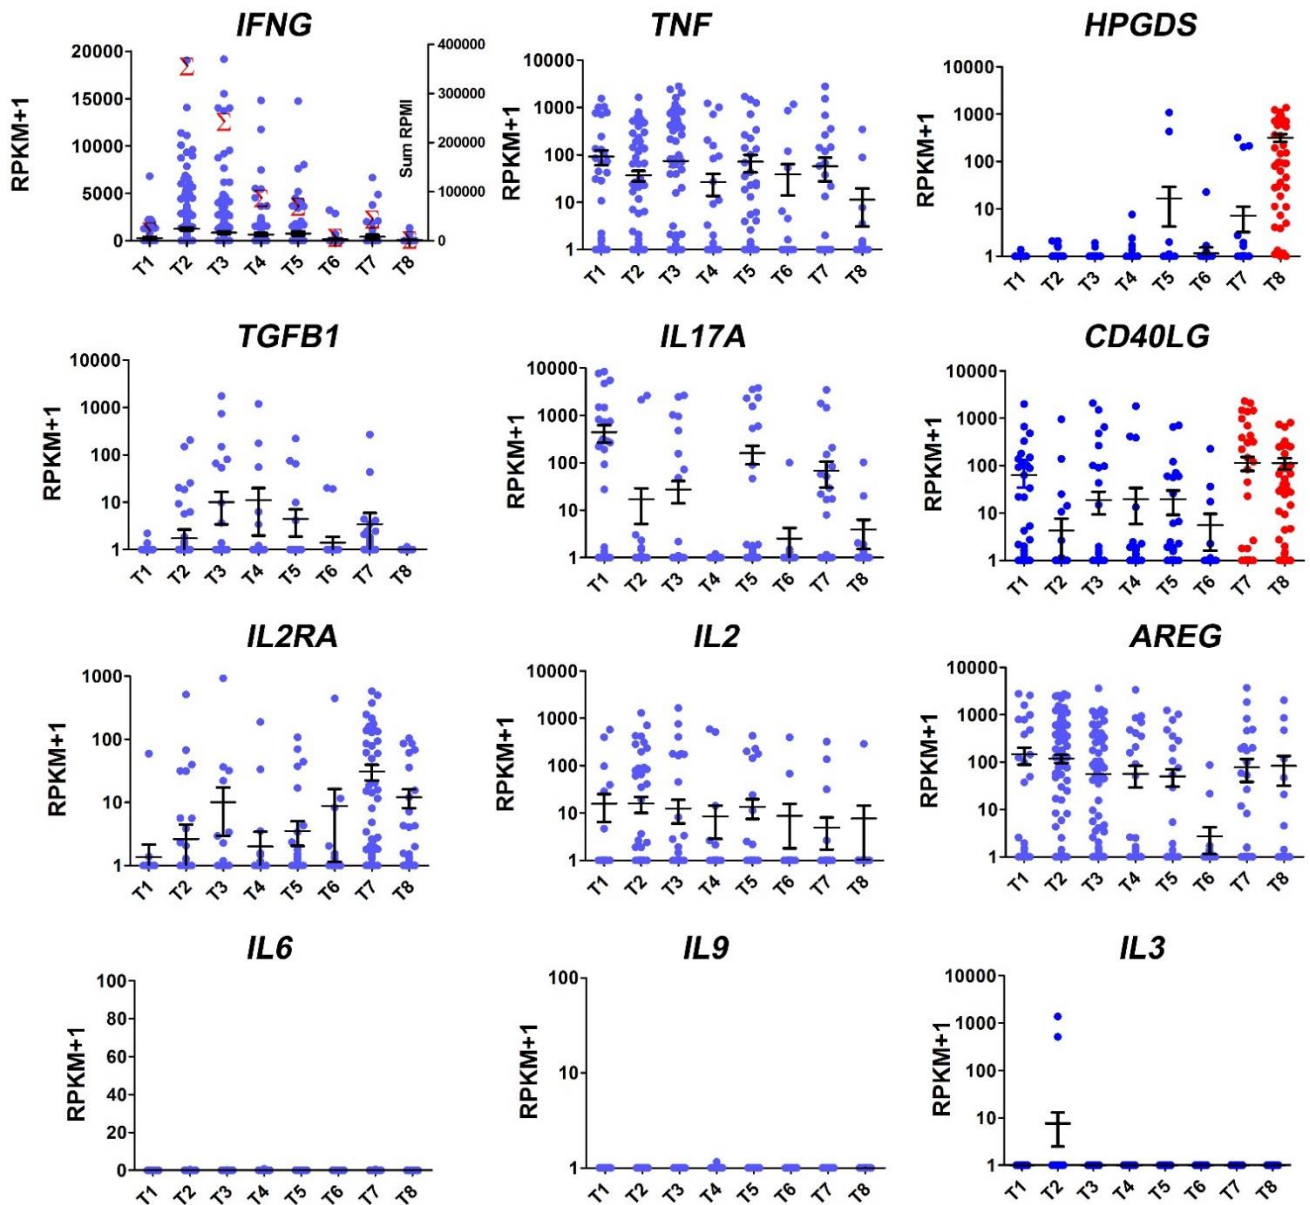

**S Figure 8. Extended panel of gene expression by tissue CD3<sup>+</sup> T cells as a function of T cell cluster.** Focusing on a panel of T cell cytokines relevant to allergy and Th2 activation, we analyzed their cluster-specific expression levels and patterns. In *IFNG* panel, a red  $\Sigma$  resembles the cumulative expression level within a given cluster referred to the right y axis. In the graphs of *HPGDS* and *CD40LG/CD154*, the red color was used to emphasize the unique high expression in reference to other clusters in blue. Data were graphed as Mean  $\pm$  SEM with each dot representing a single T cell.

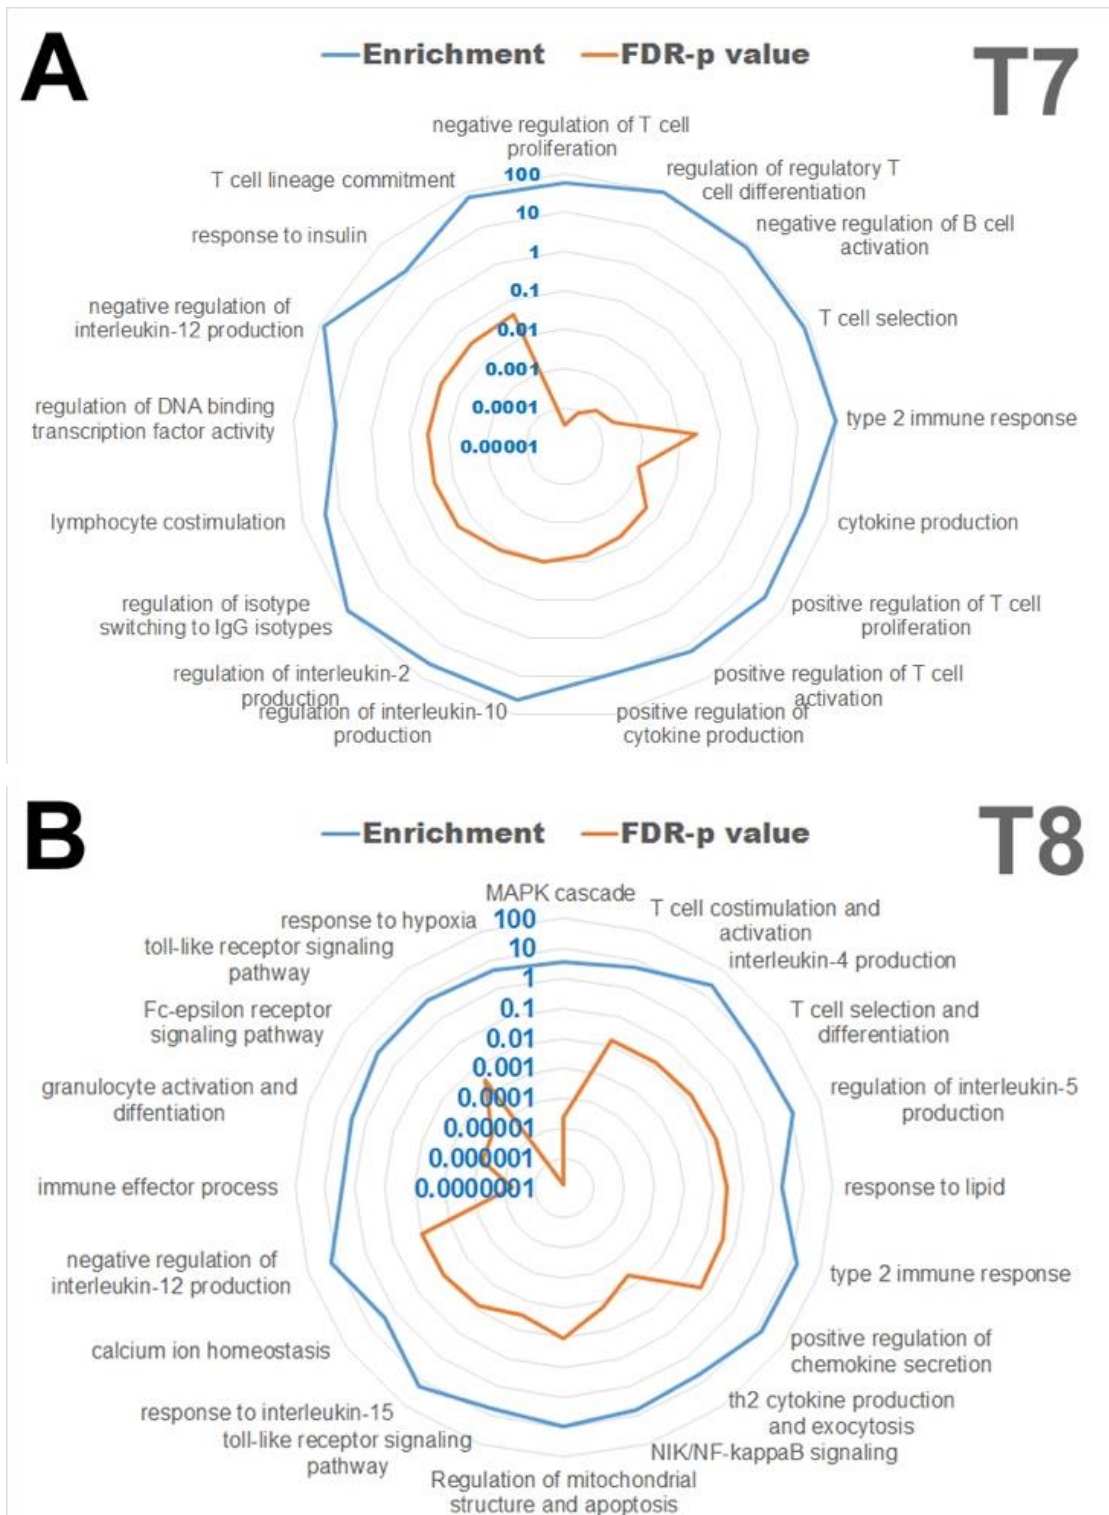

**S Figure 9. Gene ontology analyses focusing on functionality of T7 and T8**

Gene ontology analysis (FDR-adjusted  $p < 0.05$ , Fisher test-based) revealed major biological functions of T7 (A) and T8 (B) presented by radar map. The full functional lists are shown in Table S8 and S9.

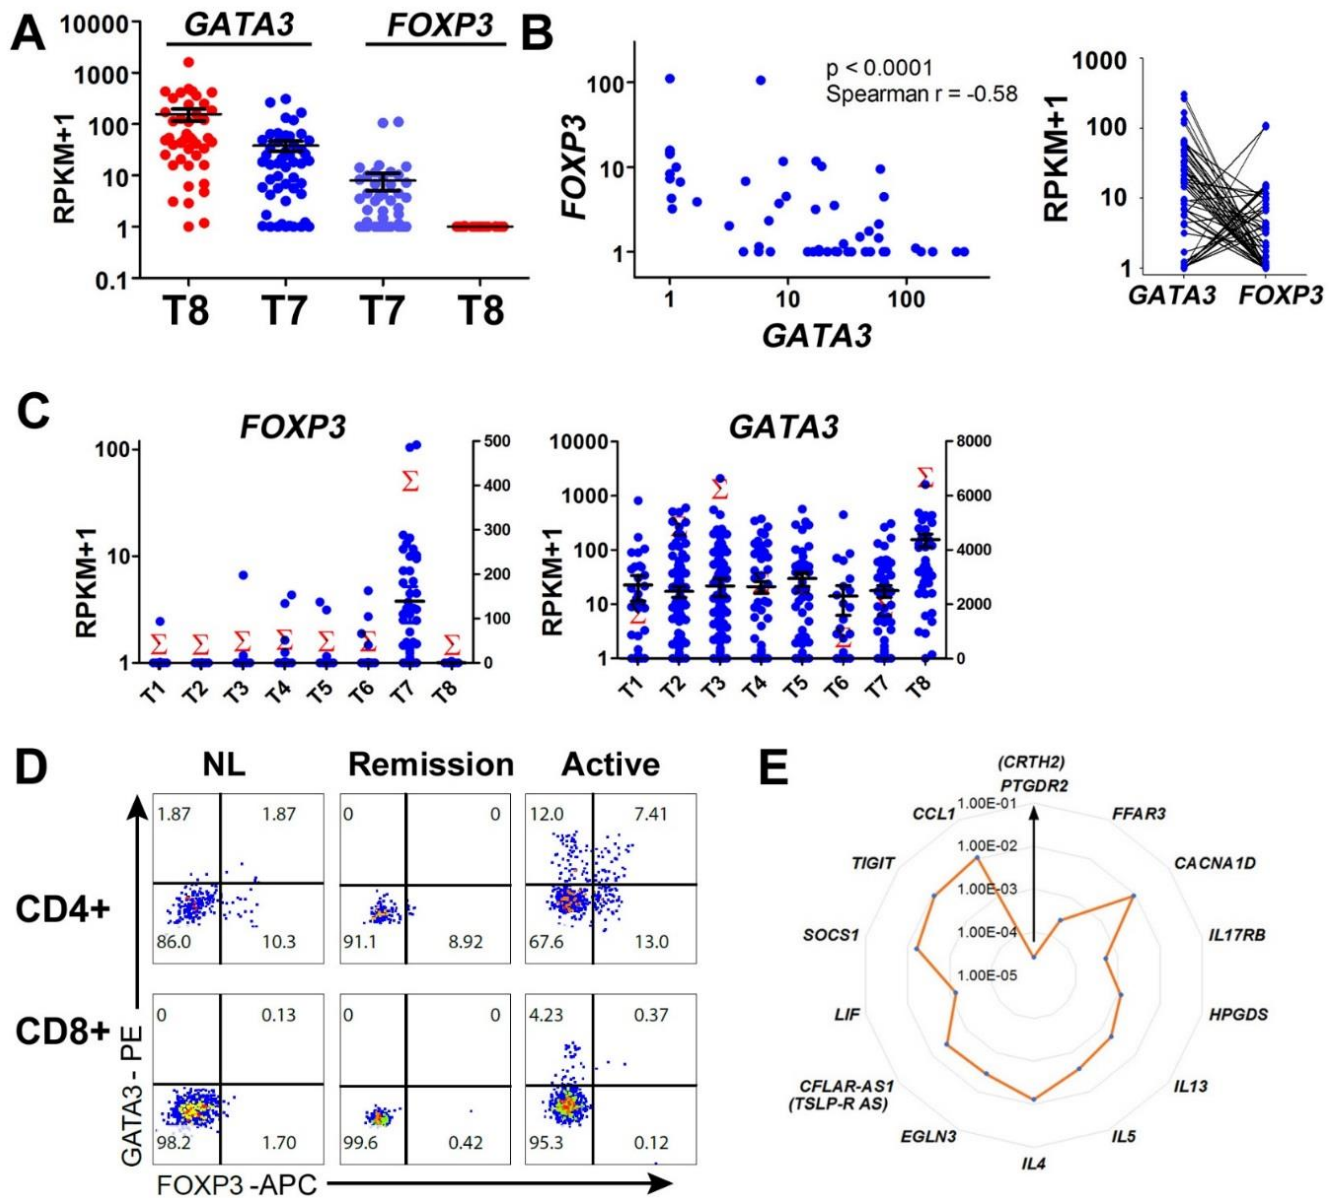

**S Figure 10. Transcriptional and translational properties of T7 and T8 clusters and disease-related clinical correlating genes.**

A, The expression levels of two key transcription factors determining the differentiation of T<sub>REG</sub> and peTh2, FOXP3 and GATA3, respectively, within the T7 and T8 cluster, are plotted at single-cell levels to illustrate their mutually exclusive pattern. B, With T7 and T8 cells double-plotted on FOXP3 and GATA3, a negative correlation (left panel,  $p < 0.0001$ , spearman correlation) and a largely mutually exclusive relationship (right panel) at single-cell resolution is found. C, Expression profiles of GATA3 and FOXP3 in all T8 clusters with 1088 T cells plotted. Each cell's RPKM exhibited on left y axis and the RPKM  $\Sigma$

in that particular T cluster shown with the red  $\Sigma$  tracked to the right y axis. (Mean  $\pm$  SEM) D, FACS analysis of esophageal CD3<sup>+</sup> T cells from active EoE biopsies. CD3<sup>+</sup> CD4<sup>+</sup> and CD3<sup>+</sup>CD8<sup>+</sup> gated (internal negative control) events were double-plotted on FOXP3 and GATA3. E, A selected gene cohort whose expression correlated with EoE clinical severity (tissue eosinophilia), with the Pearson correlation p value plotted in the radar map.

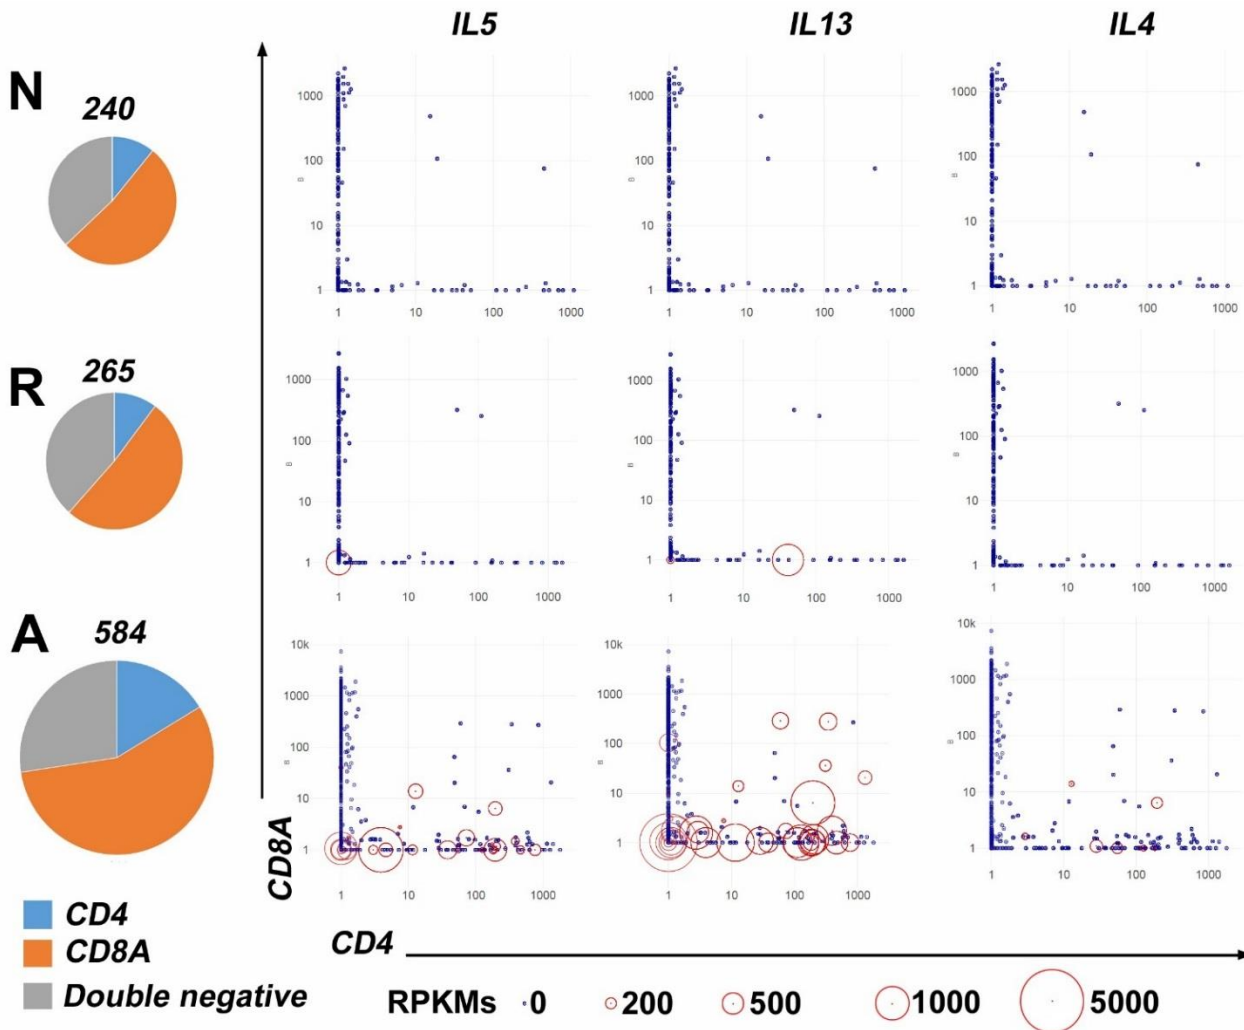

**S Figure 11. 2D-TRACER analysis for single-cell Th2 cytokine expression topology**

Left panel: CD3<sup>+</sup> tissue T cells from active (A), remission (R), and normal (N) were quantitatively analyzed by CD4-CD8A expressions. CD4 T cells are defined by CD4 RPKM > 2.0 per single cell as shown in blue, with CD8 T cells by CD8 RPKM > 2.0 shown in orange and non-CD4/non-CD8 cells (Double negative) defined by RPKMs < 2.0 for both shown in grey. Right panel: following the same disease activity designation on the left, Th2 cytokine-positive cells are color-traced for the given Th2 cytokine by a red circle, with the area of that circle proportional to the Th2 cytokine RPKM at the single-cell level. A scale of a series of RPKM circles is shown on the bottom.

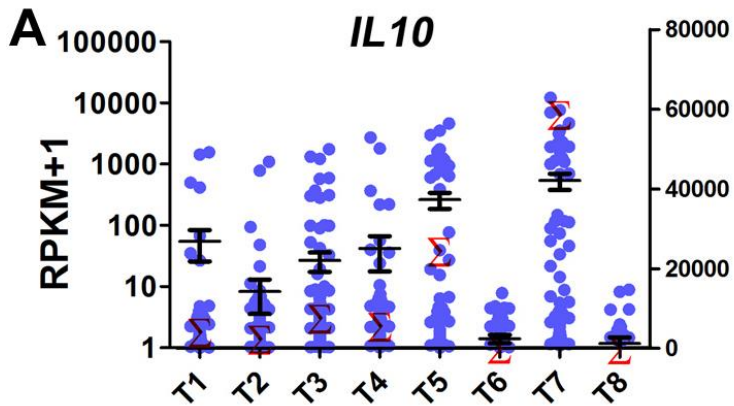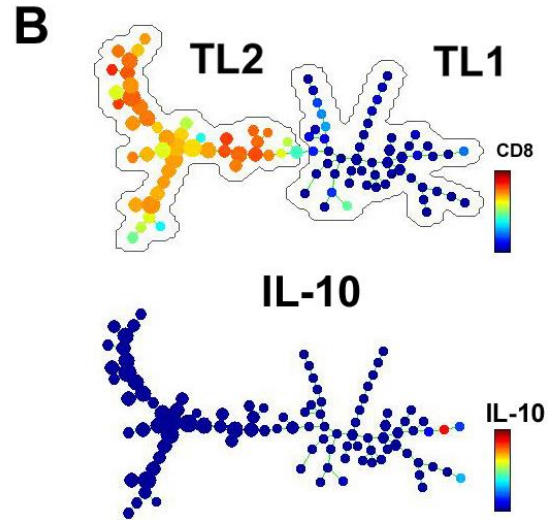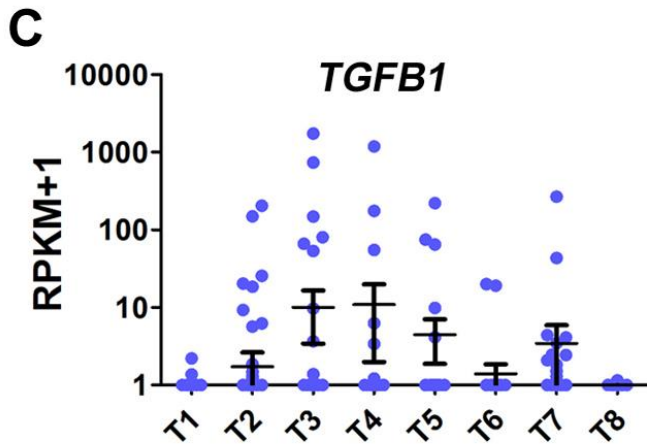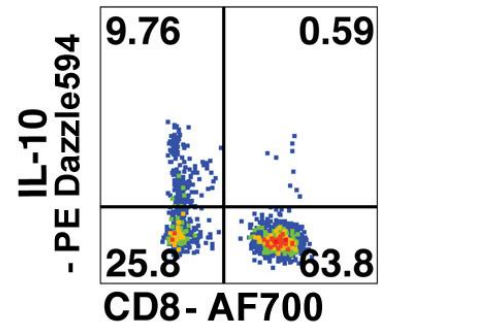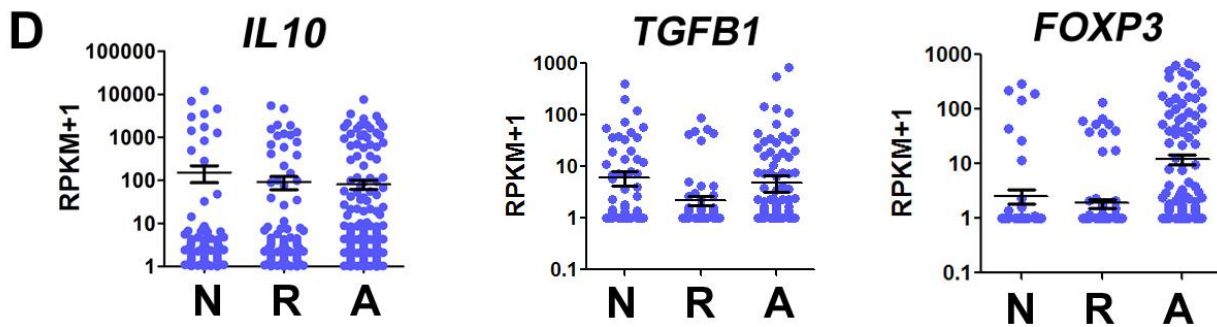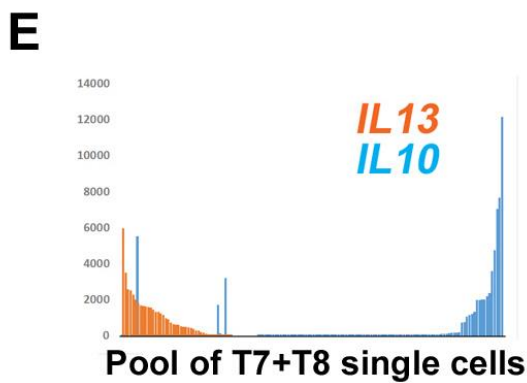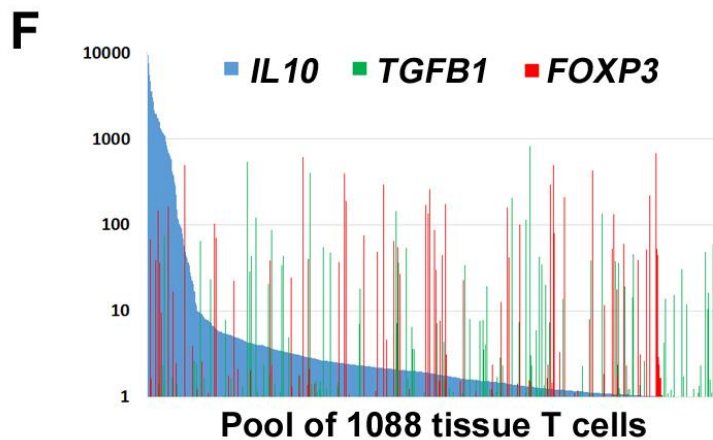

**S Figure 12. The single-cell expression analysis for major T<sub>REG</sub> anti-inflammatory cytokines**

A, Across all T1-T8 clusters, expression pattern and levels of IL10 are shown at the single-cell level. Each data point represents a T cell that is tracked for RPKM expression on the left y axis. The cumulative/overall *IL10* expression for each cluster derived is graphed on the right y axis with their cumulative RPKM levels indicated by the red  $\Sigma$ . B, In light of the TL1-TL2 (CD4-CD8) bifurcation determined by the SPADE (Spanning-tree Progression Analysis of Density-normalized Events) analysis (Fig. 6), the developmental tree nodes of IL-10 producers were illustrated by the same tree color-scaled on *IL10* expression, with a representative double plot of IL-10/CD8 shown on the bottom. C, Scatter plots for single-cell *TGFB1* production across T1-T8 (N, normal; R, remission; A, active) are shown. D, Scatter plots for single-cell *IL10*, *TGFB1* and *FOXP3* production as a function of disease status are shown. E, The single-cell expression histogram of *IL10* and representative Th2 cytokine *IL13* for the pool of T7 and T8 combined. F, Tissue T cell pool of 1088 cells were sorted by *IL10* expression levels (blue) with highest values on the left (RPKM), with *TGFB1* and *FOXP3* labeled by green and red on the same single-cell histogram, respectively. All data were shown as Mean  $\pm$  SEM.

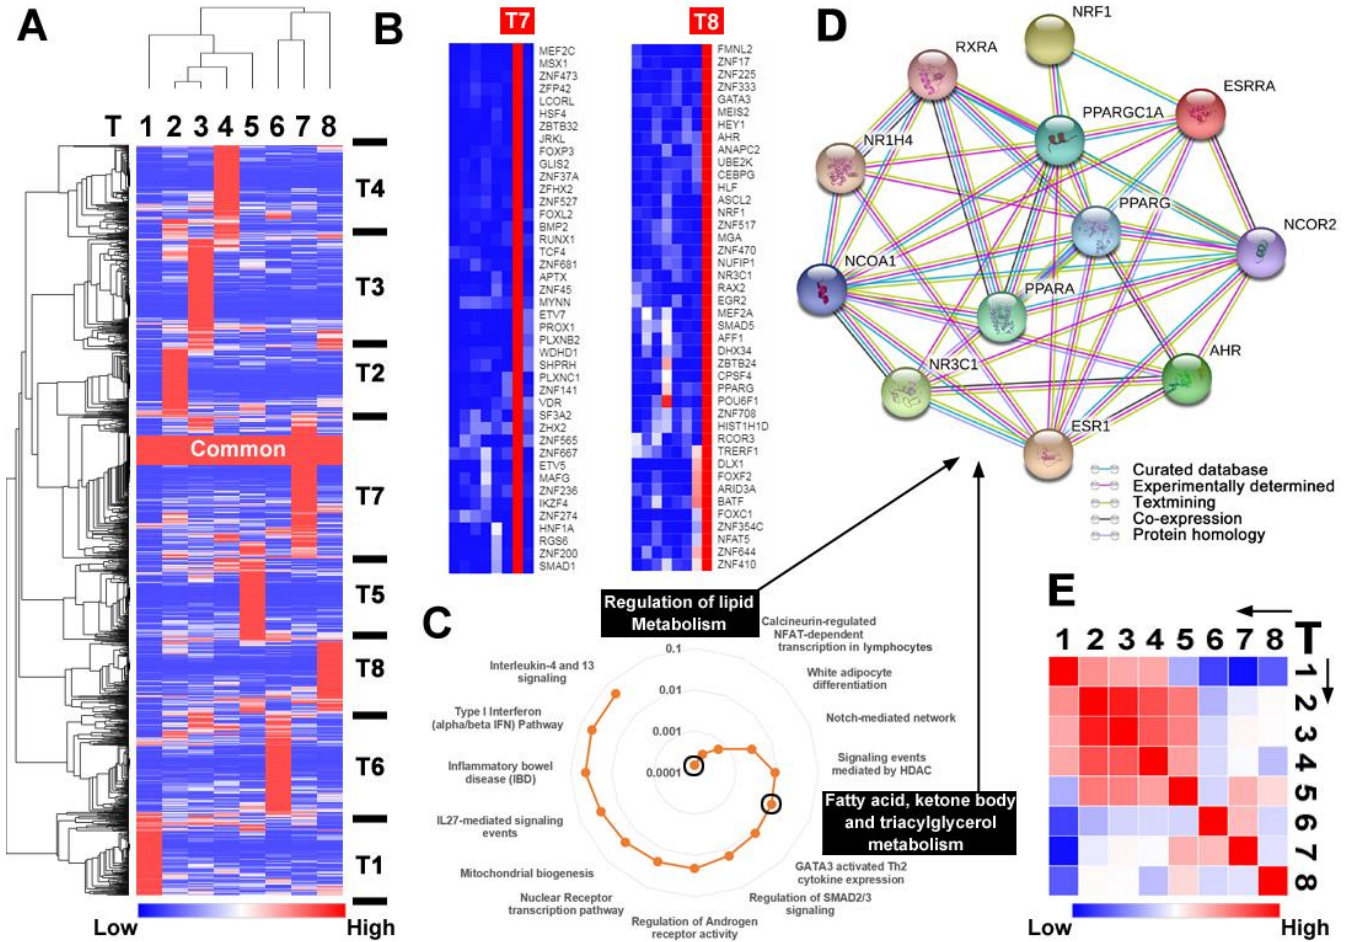

**S Figure 13. Distinct transcription factor profiles across T1-T8**

A, On the basis of the known 1391 human transcription factor as reported, the transcription factor expression profile was revealed by an averaged heatmap across T1-T8, with red being higher expression and blue being low in each row. The heatmap was clustered on the basis of transcription factor entities across T1-T8. B, A closer view of the areas where T7 and T8 selective transcription factors are enriched. C, On the basis of 133 T8 selective transcription factors, gene ontology analysis revealed major pathways related to T8 functionalities with p value shown by the radar scanning. D, Genes contributing to the two lipid activation pathways were further analyzed for protein interactions, with the interaction type legend shown beneath the diagram. E, A heat diagram of Pearson correlation among T1-T8 on the basis of the transcription factor profiling.



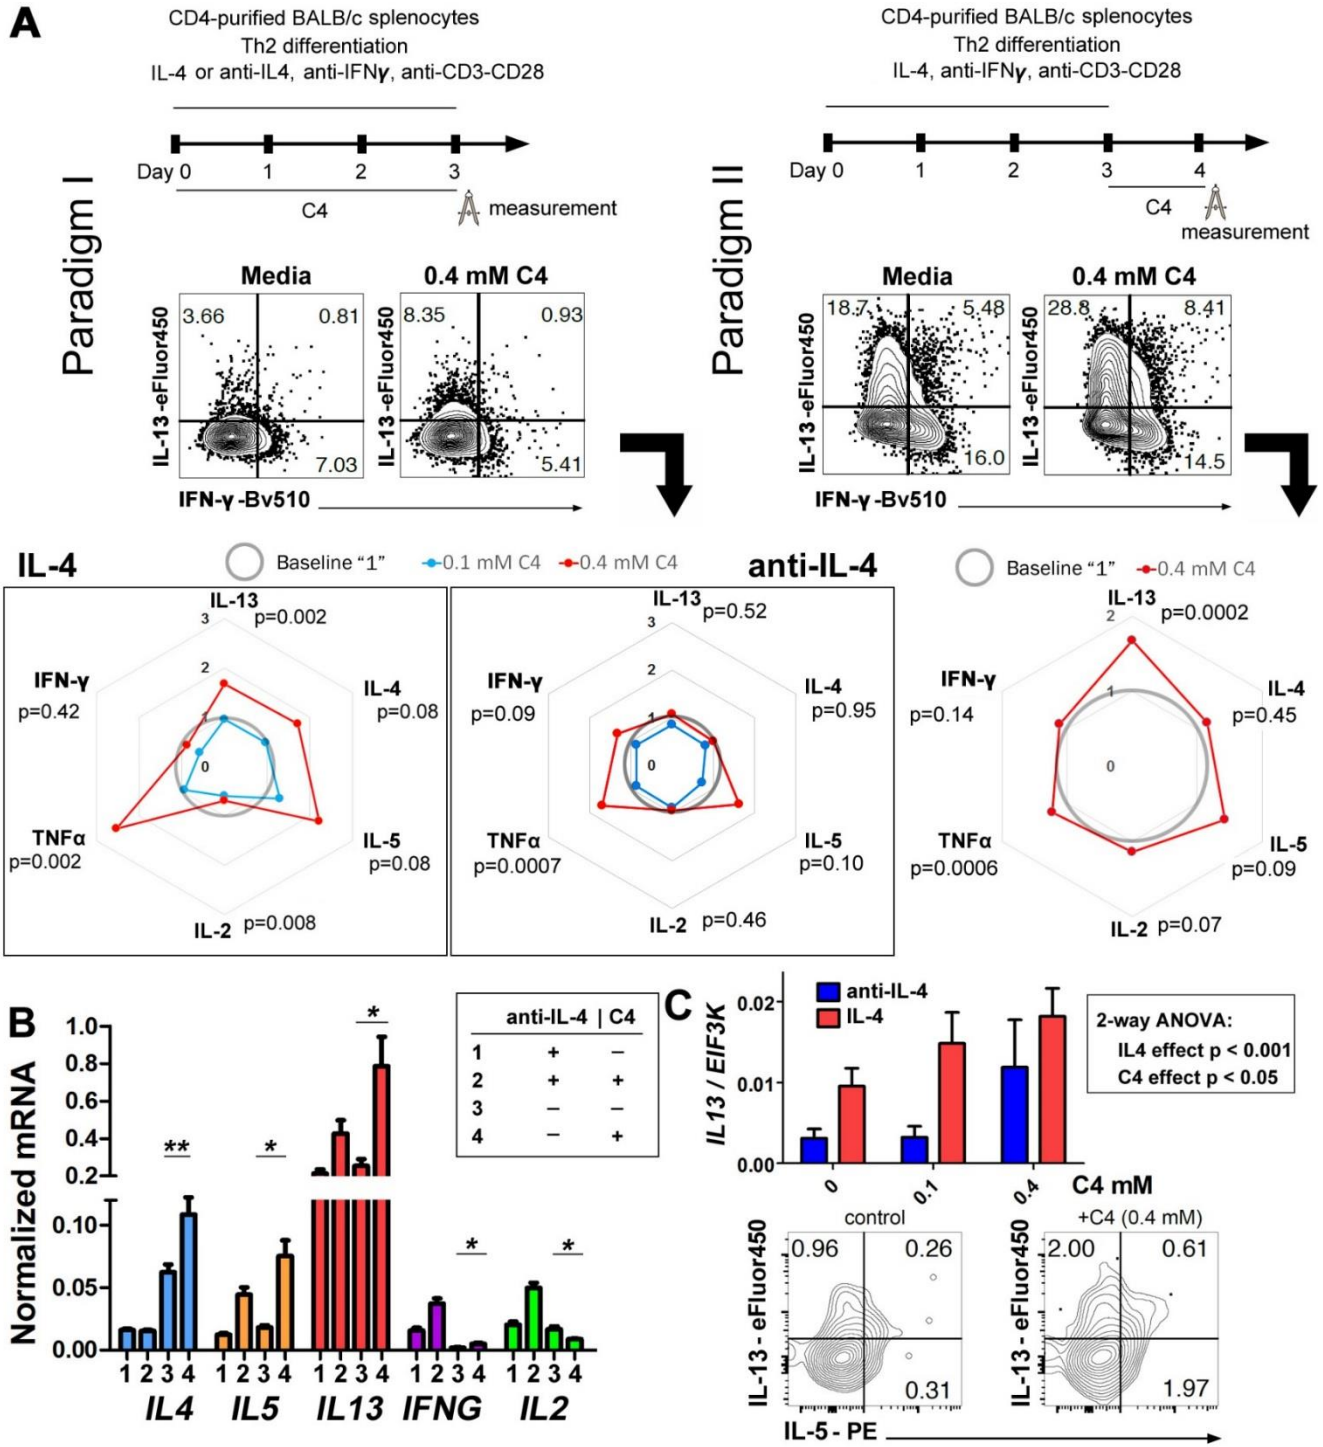

**S Figure 14. Th2 cytokine enhancement by C4 in murine and human primary TH cells.**

A, Murine splenocytes were CD4 purified (> 95% purity) followed by a Th2 or Th0 differentiations (anti-IFN- $\gamma$ , anti-CD3-CD28) for 3 days with either IL-4 or anti-IL-4 supplemented, respectively. Butyrate (C4, at 0.1 or 0.4 mM) was added at different time points as schematically summarized on the top panel.

Cytokines were assessed by intracellular FACS staining at the indicated “measurement” points following a PDBU (1) and ionomycin stimulation, with representative double plots shown in the middle panel. Radar scanning map shows the C4 enhancement effects on all cytokine analyzed in two different experimental protocols; data are normalized to effect of media exposure as a grey baseline circle. B, Following the experimental protocol depicted on the left in (A), mRNA was analyzed for the T cell cytokine expression in the absence and presence of C4 and anti-IL-4 or IL-4 treatment. During CD4 cell activation, anti-IL-4 was added to neutralize endogenic secretion of IL-4 (\*  $p < 0.05$ , \*\*  $p < 0.01$ , 2-tailed t-test IL-4 vs. IL-4+C4 [3 vs. 4]). C, Human PBMC from healthy donors were purified by CD4 positive selection and then subjected to Th2 or Th0 differentiation during culture (anti-IFN- $\gamma$  and anti-CD3-CD28) in the presence of either IL-4 or anti IL-4 for 3 days, with or without C4 (0.1 or 0.4 mM). The *IL13* mRNA level was measure by qRT-PCR, and 2-way ANOVA was used to examine the IL-4 vs. anti-IL-4 effects and the C4 effect. FACS data was obtained similarly with 5 days of activation in the absence and presence of C4 (0.4 mM).

## Supplementary Tables

**Table S1. Significant gene list from bulk CD3+ RNA-seq of blood vs. tissue lymphocytes**

| Gene Symbol        | Gene ID | FC ([Blood-N] vs [Tissue-N]) | FC ([Blood-R] vs [Tissue-R]) | FC ([Blood-A] vs [Tissue-A]) |
|--------------------|---------|------------------------------|------------------------------|------------------------------|
| <i>GCNT4</i>       | 51301   | 675.2                        | 234.6                        | 22.5                         |
| <i>DSC1</i>        | 1823    | 500.7                        | 28.5                         | 37.7                         |
| <i>NRCAM</i>       | 4897    | 497.7                        | 189.5                        | 88.2                         |
| <i>DCHS1</i>       | 8642    | 458.2                        | 83.1                         | 16.4                         |
| <i>VCAN</i>        | 1462    | 438.1                        | 2172.4                       | 192.0                        |
| <i>PCSK5</i>       | 5125    | 416.8                        | 29.8                         | 58.9                         |
| <i>AK5</i>         | 26289   | 400.4                        | 38.6                         | 88.0                         |
| <i>ADD2</i>        | 119     | 363.3                        | 123.3                        | 60.7                         |
| <i>TSPAN18</i>     | 90139   | 354.6                        | 327.1                        | 42.7                         |
| <i>NBEA</i>        | 26960   | 353.9                        | 70.8                         | 38.6                         |
| <i>ANKRD55</i>     | 79722   | 349.5                        | 103.5                        | 17.1                         |
| <i>AFF2</i>        | 2334    | 347.7                        | 147.1                        | 25.0                         |
| <i>VIPR1</i>       | 7433    | 309.4                        | 125.1                        | 233.4                        |
| <i>TRABD2A</i>     | 129293  | 306.3                        | 104.8                        | 66.6                         |
| <i>DACT1</i>       | 51339   | 282.0                        | 222.0                        | 103.1                        |
| <i>S1PR5</i>       | 53637   | 247.6                        | 11.6                         | 23.8                         |
| <i>ACVR1C</i>      | 130399  | 246.7                        | 13.6                         | 20.2                         |
| <i>CR2</i>         | 1380    | 243.2                        | 73.2                         | 23.8                         |
| <i>ZNF204P</i>     | 7754    | 221.7                        | 10.1                         | 16.6                         |
| <i>NCF2</i>        | 4688    | 218.3                        | 17.1                         | 11.7                         |
| <i>ZNF711</i>      | 7552    | 209.5                        | 15.4                         | 49.5                         |
| <i>SULT1B1</i>     | 27284   | 179.2                        | 30.5                         | 27.7                         |
| <i>CCR7</i>        | 1236    | 177.7                        | 36.9                         | 10.8                         |
| <i>GRIN3A</i>      | 116443  | 165.1                        | 11.4                         | 13.0                         |
| <i>HEMGN</i>       | 55363   | 163.2                        | 55.9                         | 34.5                         |
| <i>NEFL</i>        | 4747    | 145.8                        | 39.3                         | 19.0                         |
| <i>NOG</i>         | 9241    | 145.3                        | 72.1                         | 82.1                         |
| <i>MIR4697HG</i>   | 283174  | 144.1                        | 21.6                         | 20.3                         |
| <i>SLC16A10</i>    | 117247  | 142.0                        | 10.2                         | 14.7                         |
| <i>GIPC3</i>       | 126326  | 139.4                        | 62.6                         | 29.3                         |
| <i>AKR1E2</i>      | 83592   | 136.6                        | 34.8                         | 23.7                         |
| <i>S1PR1</i>       | 1901    | 135.9                        | 36.7                         | 12.2                         |
| <i>MORF4L2-AS1</i> | 340544  | 130.4                        | 49.5                         | 16.8                         |
| <i>LINC00612</i>   | 253128  | 125.8                        | 10.5                         | 21.4                         |
| <i>RBM11</i>       | 54033   | 118.8                        | 13.5                         | 11.3                         |
| <i>LINC00282</i>   | 283521  | 117.7                        | 48.3                         | 88.3                         |

|                     |           |       |        |       |
|---------------------|-----------|-------|--------|-------|
| <i>MYH3</i>         | 4621      | 117.3 | 33.8   | 11.3  |
| <i>FAM87B</i>       | 400728    | 117.2 | 43.6   | 20.2  |
| <i>AMIGO1</i>       | 57463     | 113.9 | 54.1   | 10.6  |
| <i>LOC101928150</i> | 101928150 | 112.1 | 66.0   | 24.3  |
| <i>MSX2P1</i>       | 55545     | 110.8 | 53.2   | 47.6  |
| <i>ALKBH3-AS1</i>   | 100507300 | 110.0 | 14.1   | 26.7  |
| <i>CHRNA2</i>       | 1141      | 108.8 | 36.8   | 13.4  |
| <i>MDS2</i>         | 259283    | 105.3 | 78.2   | 46.0  |
| <i>ATP8A2</i>       | 51761     | 103.0 | 24.5   | 22.3  |
| <i>HAVCR1</i>       | 26762     | 102.3 | 33.5   | 44.2  |
| <i>FGFBP2</i>       | 83888     | 98.7  | 46.0   | 31.8  |
| <i>SSTR3</i>        | 6753      | 93.4  | 66.8   | 15.7  |
| <i>FHIT</i>         | 2272      | 92.2  | 213.5  | 33.0  |
| <i>KRT73</i>        | 319101    | 92.0  | 74.6   | 24.6  |
| <i>APOBEC2</i>      | 10930     | 89.4  | 35.5   | 15.1  |
| <i>LEF1-AS1</i>     | 641518    | 87.5  | 15.3   | 48.3  |
| <i>LINC00565</i>    | 100861555 | 85.0  | 57.8   | 61.0  |
| <i>ARHGAP10</i>     | 9639      | 84.8  | 54.3   | 24.4  |
| <i>TTYH2</i>        | 94015     | 80.4  | 20.5   | 10.9  |
| <i>AFF3</i>         | 3899      | 76.6  | 21.6   | 29.6  |
| <i>CLMP</i>         | 79827     | 72.1  | 44.7   | 21.2  |
| <i>HCG27</i>        | 253018    | 71.8  | 63.5   | 16.9  |
| <i>LINC00854</i>    | 100874261 | 71.2  | 10.5   | 11.9  |
| <i>KCNJ10</i>       | 3766      | 70.2  | 29.7   | 35.1  |
| <i>PFN2</i>         | 5217      | 69.6  | 20.6   | 13.7  |
| <i>KBTBD11</i>      | 9920      | 69.1  | 36.8   | 32.0  |
| <i>GP5</i>          | 2814      | 67.4  | 59.5   | 39.8  |
| <i>EFHC2</i>        | 80258     | 67.3  | 34.3   | 23.5  |
| <i>KLHL29</i>       | 114818    | 67.2  | 48.1   | 10.7  |
| <i>CD300E</i>       | 342510    | 67.0  | 1069.1 | 382.4 |
| <i>KRT72</i>        | 140807    | 64.8  | 55.8   | 33.5  |
| <i>ZNF239</i>       | 8187      | 63.9  | 10.7   | 37.1  |
| <i>FAM153A</i>      | 285596    | 63.4  | 14.3   | 54.2  |
| <i>FAM226A</i>      | 203429    | 63.1  | 20.0   | 13.2  |
| <i>C10orf2</i>      | 56652     | 59.6  | 21.6   | 15.5  |
| <i>LOC101927124</i> | 101927124 | 59.5  | 10.9   | 19.5  |
| <i>CLDN20</i>       | 49861     | 59.3  | 32.3   | 13.8  |
| <i>PMEL</i>         | 6490      | 59.1  | 37.0   | 20.8  |
| <i>WNT7A</i>        | 7476      | 59.1  | 65.9   | 33.1  |
| <i>TMEM177</i>      | 80775     | 57.7  | 14.1   | 12.3  |
| <i>METTL21EP</i>    | 121952    | 57.6  | 22.9   | 10.4  |

|                     |           |      |       |       |
|---------------------|-----------|------|-------|-------|
| <i>LRRN1</i>        | 57633     | 56.7 | 33.5  | 39.8  |
| <i>USP44</i>        | 84101     | 56.6 | 20.3  | 22.3  |
| <i>LILRA1</i>       | 11024     | 54.9 | 318.4 | 148.1 |
| <i>FAM153B</i>      | 202134    | 54.8 | 16.2  | 40.9  |
| <i>CFP</i>          | 5199      | 54.5 | 85.8  | 45.4  |
| <i>SIGLEC9</i>      | 27180     | 53.9 | 77.8  | 53.5  |
| <i>BEND5</i>        | 79656     | 53.8 | 25.0  | 20.7  |
| <i>C10orf25</i>     | 220979    | 53.6 | 37.8  | 13.4  |
| <i>ACE</i>          | 1636      | 53.0 | 41.0  | 10.0  |
| <i>CXCR2</i>        | 3579      | 52.7 | 21.2  | 12.3  |
| <i>EDAR</i>         | 10913     | 52.6 | 35.6  | 27.6  |
| <i>ALK</i>          | 238       | 52.5 | 16.2  | 17.3  |
| <i>SYNM</i>         | 23336     | 52.4 | 15.9  | 10.9  |
| <i>CSF3R</i>        | 1441      | 52.1 | 132.3 | 16.3  |
| <i>MINOS1P1</i>     | 100462953 | 51.7 | 34.3  | 18.1  |
| <i>GNG7</i>         | 2788      | 51.3 | 64.1  | 41.4  |
| <i>ME3</i>          | 10873     | 51.0 | 11.7  | 37.5  |
| <i>MYLK4</i>        | 340156    | 48.5 | 10.0  | 11.8  |
| <i>TIMD4</i>        | 91937     | 47.8 | 69.3  | 27.0  |
| <i>ZNF572</i>       | 137209    | 47.2 | 15.2  | 34.5  |
| <i>LOC100507387</i> | 100507387 | 47.0 | 25.7  | 32.6  |
| <i>FMO5</i>         | 2330      | 46.8 | 10.3  | 12.8  |
| <i>FCN1</i>         | 2219      | 46.8 | 637.5 | 268.6 |
| <i>ZSCAN23</i>      | 222696    | 45.2 | 16.8  | 10.7  |
| <i>SELP</i>         | 6403      | 44.4 | 13.9  | 14.6  |
| <i>REG4</i>         | 83998     | 43.7 | 52.3  | 30.1  |
| <i>FLT4</i>         | 2324      | 43.5 | 10.7  | 24.8  |
| <i>GAS7</i>         | 8522      | 42.4 | 20.8  | 10.3  |
| <i>IFNG-AS1</i>     | 100885789 | 42.3 | 59.5  | 27.8  |
| <i>HPCAL4</i>       | 51440     | 41.4 | 172.1 | 35.1  |
| <i>ZFP2</i>         | 80108     | 41.3 | 17.2  | 11.8  |
| <i>GDAP1L1</i>      | 78997     | 40.8 | 11.1  | 12.2  |
| <i>ASRGL1</i>       | 80150     | 39.5 | 41.3  | 17.5  |
| <i>S100A12</i>      | 6283      | 39.1 | 12.6  | 124.1 |
| <i>ST6GALNAC1</i>   | 55808     | 39.1 | 13.3  | 11.8  |
| <i>CACHD1</i>       | 57685     | 38.8 | 20.5  | 12.2  |
| <i>LOC101927053</i> | 101927053 | 38.6 | 10.7  | 30.6  |
| <i>TAS2R3</i>       | 50831     | 38.3 | 23.6  | 14.9  |
| <i>ZC3H12B</i>      | 340554    | 36.0 | 11.9  | 11.5  |
| <i>ACSBG2</i>       | 81616     | 34.8 | 13.1  | 10.9  |
| <i>NPAS2</i>        | 4862      | 34.7 | 19.6  | 13.1  |

|                   |           |      |       |       |
|-------------------|-----------|------|-------|-------|
| <i>ACTG1P4</i>    | 648740    | 34.3 | 38.9  | 50.4  |
| <i>SMCR5</i>      | 140771    | 34.2 | 40.6  | 10.8  |
| <i>PNMA3</i>      | 29944     | 34.2 | 62.9  | 10.2  |
| <i>PRAM1</i>      | 84106     | 33.5 | 65.5  | 15.0  |
| <i>ASIC3</i>      | 9311      | 32.6 | 29.8  | 20.6  |
| <i>LIMS2</i>      | 55679     | 31.9 | 76.0  | 11.7  |
| <i>MAGEF1</i>     | 64110     | 31.9 | 13.7  | 10.6  |
| <i>S1PR4</i>      | 8698      | 31.4 | 14.4  | 10.1  |
| <i>DIP2C</i>      | 22982     | 30.9 | 13.5  | 28.3  |
| <i>CCDC71</i>     | 64925     | 30.7 | 20.2  | 13.7  |
| <i>MKRN3</i>      | 7681      | 30.5 | 11.4  | 16.8  |
| <i>AQP11</i>      | 282679    | 30.2 | 10.7  | 22.5  |
| <i>ZFP37</i>      | 7539      | 29.9 | 15.7  | 10.3  |
| <i>HCG8</i>       | 100507399 | 29.7 | 25.7  | 16.5  |
| <i>MUC6</i>       | 4588      | 29.2 | 48.7  | 34.3  |
| <i>LOC653160</i>  | 653160    | 28.9 | 48.1  | 12.5  |
| <i>ALDH8A1</i>    | 64577     | 28.8 | 25.1  | 24.9  |
| <i>ANKRD36BP2</i> | 645784    | 27.8 | 27.4  | 19.8  |
| <i>EXOSC5</i>     | 56915     | 27.3 | 12.9  | 11.5  |
| <i>DSEL</i>       | 92126     | 27.1 | 12.3  | 10.2  |
| <i>KATNAL2</i>    | 83473     | 27.1 | 15.4  | 33.3  |
| <i>CD79A</i>      | 973       | 26.8 | 53.3  | 13.3  |
| <i>PADI4</i>      | 23569     | 26.5 | 64.7  | 12.4  |
| <i>NLE1</i>       | 54475     | 25.4 | 30.1  | 13.8  |
| <i>PI16</i>       | 221476    | 24.9 | 16.0  | 30.4  |
| <i>PRPH2</i>      | 5961      | 24.6 | 11.6  | 10.9  |
| <i>NLRC4</i>      | 58484     | 24.0 | 45.3  | 35.0  |
| <i>CRISPLD2</i>   | 83716     | 23.0 | 35.4  | 157.7 |
| <i>LOC441454</i>  | 441454    | 22.6 | 15.9  | 13.1  |
| <i>DPPA4</i>      | 55211     | 22.5 | 17.3  | 46.7  |
| <i>MFSD3</i>      | 113655    | 22.3 | 31.6  | 11.9  |
| <i>CA14</i>       | 23632     | 22.3 | 22.1  | 12.6  |
| <i>PELI2</i>      | 57161     | 22.2 | 13.0  | 12.0  |
| <i>NPY6R</i>      | 4888      | 22.0 | 23.8  | 17.3  |
| <i>SCIMP</i>      | 388325    | 21.5 | 17.1  | 24.4  |
| <i>SORCS3</i>     | 22986     | 21.0 | 11.1  | 11.8  |
| <i>TXNRD3</i>     | 114112    | 20.4 | 11.8  | 24.1  |
| <i>LY86</i>       | 9450      | 20.3 | 23.9  | 26.3  |
| <i>NUDT10</i>     | 170685    | 20.1 | 12.5  | 27.5  |
| <i>NME9</i>       | 347736    | 19.5 | 110.5 | 13.8  |
| <i>ZCWPW1</i>     | 55063     | 18.9 | 20.4  | 11.3  |

|                     |           |       |        |        |
|---------------------|-----------|-------|--------|--------|
| <i>MCEMP1</i>       | 199675    | 18.9  | 136.3  | 122.6  |
| <i>KCNJ9</i>        | 3765      | 18.4  | 44.9   | 26.6   |
| <i>LOC100507053</i> | 100507053 | 18.3  | 16.5   | 12.4   |
| <i>PZP</i>          | 5858      | 18.2  | 25.2   | 23.7   |
| <i>FAM66C</i>       | 440078    | 18.2  | 18.4   | 12.8   |
| <i>GJA9</i>         | 81025     | 17.4  | 10.8   | 16.3   |
| <i>TCF7L1</i>       | 83439     | 16.9  | 12.4   | 16.1   |
| <i>RPL34-AS1</i>    | 285456    | 16.8  | 29.4   | 23.1   |
| <i>LINC00908</i>    | 284276    | 16.8  | 38.4   | 15.8   |
| <i>C11orf74</i>     | 119710    | 16.7  | 13.1   | 18.6   |
| <i>PYGM</i>         | 5837      | 16.4  | 10.6   | 16.6   |
| <i>RXFP4</i>        | 339403    | 15.8  | 14.6   | 11.1   |
| <i>TREM1</i>        | 54210     | 15.3  | 116.0  | 22.3   |
| <i>KNOP1</i>        | 400506    | 15.2  | 25.4   | 18.4   |
| <i>ALDH1A1</i>      | 216       | 14.8  | 177.2  | 30.4   |
| <i>LOC100507091</i> | 100507091 | 14.2  | 14.6   | 12.1   |
| <i>PACSIN1</i>      | 29993     | 14.1  | 52.3   | 20.6   |
| <i>ZNF467</i>       | 168544    | 13.8  | 16.3   | 21.3   |
| <i>AQP9</i>         | 366       | 13.4  | 135.4  | 22.5   |
| <i>FBN2</i>         | 2201      | 13.0  | 31.9   | 17.1   |
| <i>LINC00987</i>    | 100499405 | 12.8  | 16.9   | 17.7   |
| <i>C17orf51</i>     | 339263    | 12.2  | 20.4   | 14.1   |
| <i>SELL</i>         | 6402      | 11.7  | 25.0   | 11.7   |
| <i>CCL27</i>        | 10850     | 11.3  | 22.2   | 10.5   |
| <i>KCNQ5-AS1</i>    | 100873997 | 11.0  | 10.9   | 14.8   |
| <i>GRAPL</i>        | 400581    | 10.9  | 22.2   | 22.3   |
| <i>NFE2</i>         | 4778      | 10.9  | 82.0   | 30.7   |
| <i>FXVD6</i>        | 53826     | 10.2  | 38.9   | 87.0   |
| <i>CLCA2</i>        | 9635      | -10.0 | -198.6 | -120.1 |
| <i>ZNF331</i>       | 55422     | -10.2 | -17.2  | -11.2  |
| <i>LOC284454</i>    | 284454    | -10.6 | -14.1  | -11.6  |
| <i>EHF</i>          | 26298     | -10.6 | -269.1 | -414.7 |
| <i>KLK10</i>        | 5655      | -10.8 | -146.1 | -189.8 |
| <i>ESRP1</i>        | 54845     | -10.8 | -55.8  | -140.6 |
| <i>PAX9</i>         | 5083      | -11.4 | -42.2  | -36.9  |
| <i>ARHGEF12</i>     | 23365     | -11.5 | -14.6  | -14.2  |
| <i>PERP</i>         | 64065     | -11.9 | -33.2  | -20.6  |
| <i>SRGAP3</i>       | 9901      | -12.0 | -12.8  | -15.2  |
| <i>IL10</i>         | 3586      | -12.2 | -38.4  | -35.5  |
| <i>SDC4</i>         | 6385      | -12.5 | -52.4  | -26.5  |
| <i>DPF3</i>         | 8110      | -13.1 | -10.9  | -12.7  |

|          |        |       |        |         |
|----------|--------|-------|--------|---------|
| ZNF683   | 257101 | -13.3 | -11.9  | -19.7   |
| GPR15    | 2838   | -13.3 | -12.1  | -22.8   |
| KLRC1    | 3821   | -13.3 | -24.0  | -19.3   |
| SLC7A5   | 8140   | -13.5 | -10.8  | -11.6   |
| CXCR4    | 7852   | -13.6 | -14.2  | -13.9   |
| EGFR     | 1956   | -13.7 | -60.8  | -34.9   |
| RHCG     | 51458  | -13.7 | -155.3 | -208.3  |
| PTMS     | 5763   | -15.2 | -15.7  | -10.2   |
| S100A16  | 140576 | -15.8 | -127.8 | -109.9  |
| PDCD1    | 5133   | -16.1 | -11.3  | -12.4   |
| HSPB1    | 3315   | -17.1 | -15.2  | -13.3   |
| C1QC     | 714    | -17.3 | -92.2  | -162.5  |
| PFKFB3   | 5209   | -17.7 | -16.4  | -29.3   |
| KRT6A    | 3853   | -17.7 | -428.5 | -1386.4 |
| RASGEF1B | 153020 | -18.0 | -38.7  | -23.6   |
| TNIP3    | 79931  | -18.2 | -12.3  | -34.1   |
| PTPRF    | 5792   | -18.6 | -324.8 | -71.4   |
| JUND     | 3727   | -20.5 | -12.5  | -10.5   |
| PXDC1    | 221749 | -20.8 | -41.7  | -38.3   |
| LAMA3    | 3909   | -21.3 | -32.7  | -31.4   |
| DDIT4    | 54541  | -21.6 | -11.2  | -22.9   |
| IL1R1    | 3554   | -21.9 | -58.8  | -81.2   |
| TMEM200A | 114801 | -22.1 | -16.2  | -44.2   |
| SCUBE1   | 80274  | -22.4 | -78.6  | -254.6  |
| SCEL     | 8796   | -22.9 | -218.3 | -131.5  |
| GADD45A  | 1647   | -23.3 | -32.3  | -33.5   |
| GJB2     | 2706   | -23.3 | -71.2  | -343.5  |
| ERRFI1   | 54206  | -24.1 | -44.2  | -27.7   |
| CLCA4    | 22802  | -24.5 | -80.9  | -139.8  |
| PTTG1    | 9232   | -24.9 | -14.5  | -11.5   |
| ITGAE    | 3682   | -25.5 | -17.5  | -16.2   |
| SPRR2A   | 6700   | -25.8 | -122.7 | -16.4   |
| CREM     | 1390   | -25.9 | -22.2  | -47.0   |
| CD83     | 9308   | -26.0 | -37.9  | -20.1   |
| CTLA4    | 1493   | -26.6 | -26.2  | -35.6   |
| KLK13    | 26085  | -27.0 | -67.7  | -54.9   |
| LY6D     | 8581   | -27.3 | -266.6 | -56.0   |
| AREG     | 374    | -27.9 | -145.7 | -151.0  |
| FASLG    | 356    | -29.2 | -47.5  | -33.5   |
| AXL      | 558    | -29.3 | -28.5  | -12.4   |
| SPRY1    | 10252  | -30.2 | -67.9  | -67.2   |



|                 |           |       |        |        |
|-----------------|-----------|-------|--------|--------|
| <i>IL1R2</i>    | 7850      | -30.8 | -21.1  | -21.3  |
| <i>KIAA1217</i> | 56243     | -31.0 | -14.5  | -18.1  |
| <i>SFN</i>      | 2810      | -31.4 | -184.5 | -233.8 |
| <i>FAM46C</i>   | 54855     | -32.0 | -13.4  | -19.2  |
| <i>ITGA1</i>    | 3672      | -33.0 | -46.8  | -60.4  |
| <i>EMP1</i>     | 2012      | -33.2 | -343.5 | -10.4  |
| <i>TNFAIP3</i>  | 7128      | -33.4 | -14.9  | -24.9  |
| <i>GADD45B</i>  | 4616      | -33.7 | -13.9  | -10.9  |
| <i>SNAI1</i>    | 6615      | -34.1 | -121.9 | -49.6  |
| <i>LMNA</i>     | 4000      | -35.0 | -35.4  | -45.5  |
| <i>CXCR6</i>    | 10663     | -35.3 | -36.5  | -17.3  |
| <i>KRT19</i>    | 3880      | -35.7 | -88.5  | -64.7  |
| <i>SPRR1B</i>   | 6699      | -37.0 | -233.8 | -82.0  |
| <i>IER5L</i>    | 389792    | -37.3 | -10.5  | -19.7  |
| <i>CSF1</i>     | 1435      | -37.8 | -21.9  | -75.4  |
| <i>CD177</i>    | 57126     | -38.9 | -97.2  | -185.6 |
| <i>PDGFA</i>    | 5154      | -41.9 | -27.9  | -48.3  |
| <i>C1orf116</i> | 79098     | -42.4 | -52.4  | -20.0  |
| <i>PTN</i>      | 5764      | -42.5 | -70.5  | -54.2  |
| <i>BRE-AS1</i>  | 100302650 | -43.8 | -24.1  | -60.9  |
| <i>GADD45G</i>  | 10912     | -44.2 | -33.9  | -29.3  |
| <i>ATP1B1</i>   | 481       | -45.2 | -39.2  | -30.0  |
| <i>CCL3L3</i>   | 414062    | -45.5 | -84.0  | -72.4  |
| <i>DNAJB1</i>   | 3337      | -49.6 | -20.5  | -22.3  |
| <i>CCL3L1</i>   | 6349      | -50.2 | -78.5  | -68.3  |
| <i>TACC2</i>    | 10579     | -51.6 | -32.5  | -22.6  |
| <i>DUSP2</i>    | 1844      | -52.2 | -11.2  | -23.6  |
| <i>FERMT1</i>   | 55612     | -52.3 | -67.6  | -10.1  |
| <i>TP63</i>     | 8626      | -52.7 | -32.2  | -49.5  |
| <i>JUN</i>      | 3725      | -52.7 | -31.6  | -41.2  |
| <i>MYO7A</i>    | 4647      | -56.2 | -24.7  | -25.2  |
| <i>IL26</i>     | 55801     | -56.4 | -40.6  | -27.0  |
| <i>FAT1</i>     | 2195      | -57.5 | -39.5  | -51.6  |
| <i>CD69</i>     | 969       | -57.7 | -34.5  | -30.2  |
| <i>HTRA1</i>    | 5654      | -59.7 | -34.7  | -21.7  |
| <i>DUSP5</i>    | 1847      | -61.3 | -36.2  | -25.0  |
| <i>HES1</i>     | 3280      | -61.7 | -260.9 | -110.0 |
| <i>CKS2</i>     | 1164      | -62.9 | -31.0  | -24.7  |
| <i>CEACAM6</i>  | 4680      | -64.2 | -49.2  | -67.4  |
| <i>PHLDA1</i>   | 22822     | -69.4 | -79.8  | -78.8  |
| <i>ATF3</i>     | 467       | -69.8 | -77.1  | -195.6 |

|                     |           |         |         |        |
|---------------------|-----------|---------|---------|--------|
| <i>PPARG</i>        | 5468      | -83.0   | -16.2   | -234.2 |
| <i>LAYN</i>         | 143903    | -83.5   | -13.0   | -45.3  |
| <i>TRIM29</i>       | 23650     | -91.9   | -1525.5 | -510.4 |
| <i>CSF2</i>         | 1437      | -97.4   | -10.2   | -11.0  |
| <i>SIK1</i>         | 150094    | -100.4  | -45.0   | -54.1  |
| <i>EGR3</i>         | 1960      | -101.3  | -203.0  | -56.5  |
| <i>RGS16</i>        | 6004      | -104.1  | -50.5   | -52.5  |
| <i>FPR3</i>         | 2359      | -115.0  | -17.0   | -17.3  |
| <i>PITX1</i>        | 5307      | -115.2  | -93.2   | -65.9  |
| <i>CSRNP1</i>       | 64651     | -118.6  | -16.9   | -24.1  |
| <i>EGR1</i>         | 1958      | -128.5  | -102.3  | -20.9  |
| <i>IL22</i>         | 50616     | -135.4  | -62.4   | -28.4  |
| <i>HSPA1A</i>       | 3303      | -139.8  | -77.3   | -52.4  |
| <i>KRT15</i>        | 3866      | -175.1  | -1038.9 | -469.0 |
| <i>XCL2</i>         | 6846      | -181.1  | -102.3  | -148.4 |
| <i>CCL20</i>        | 6364      | -181.9  | -88.8   | -85.7  |
| <i>CCL3</i>         | 6348      | -194.9  | -390.3  | -163.0 |
| <i>RAPGEF5</i>      | 9771      | -208.4  | -175.0  | -237.5 |
| <i>EGR2</i>         | 1959      | -241.5  | -276.3  | -34.3  |
| <i>NTRK2</i>        | 4915      | -255.9  | -54.4   | -48.6  |
| <i>RBM14-RBM4</i>   | 100526737 | -264.2  | -110.4  | -41.4  |
| <i>HSPA1B</i>       | 3304      | -274.2  | -147.7  | -96.0  |
| <i>TJP1</i>         | 7082      | -301.7  | -539.4  | -340.0 |
| <i>CCL4</i>         | 6351      | -312.7  | -162.8  | -98.2  |
| <i>CA10</i>         | 56934     | -318.6  | -164.7  | -53.9  |
| <i>TNFSF9</i>       | 8744      | -320.5  | -521.0  | -551.5 |
| <i>HSPA6</i>        | 3310      | -321.3  | -21.7   | -26.3  |
| <i>CCL4L2</i>       | 388372    | -322.9  | -252.3  | -97.3  |
| <i>TNFRSF9</i>      | 3604      | -333.3  | -26.7   | -11.3  |
| <i>LOC101929450</i> | 101929450 | -360.9  | -19.7   | -250.6 |
| <i>IFNG</i>         | 3458      | -414.7  | -337.3  | -136.0 |
| <i>KRT5</i>         | 3852      | -443.5  | -2374.4 | -480.5 |
| <i>A2ML1</i>        | 144568    | -446.5  | -154.2  | -200.5 |
| <i>IL17A</i>        | 3605      | -524.0  | -1149.6 | -156.5 |
| <i>GEM</i>          | 2669      | -531.2  | -241.5  | -280.7 |
| <i>DSP</i>          | 1832      | -637.7  | -873.1  | -843.4 |
| <i>DUSP4</i>        | 1846      | -644.7  | -199.2  | -225.4 |
| <i>NR4A1</i>        | 3164      | -672.6  | -147.1  | -45.0  |
| <i>XCL1</i>         | 6375      | -694.4  | -261.8  | -237.6 |
| <i>NR4A3</i>        | 8013      | -1024.2 | -1407.7 | -865.5 |
| <i>NR4A2</i>        | 4929      | -1052.8 | -251.7  | -215.6 |

|               |       |         |         |         |
|---------------|-------|---------|---------|---------|
| <i>SPINK5</i> | 11005 | -1256.4 | -494.8  | -626.2  |
| <i>KRT13</i>  | 3860  | -1277.0 | -6039.0 | -698.0  |
| <i>KRT4</i>   | 3851  | -1521.6 | -640.6  | -943.2  |
| <i>CRNN</i>   | 49860 | -1528.2 | -569.2  | -59.5   |
| <i>FOSB</i>   | 2354  | -1750.5 | -505.0  | -131.0  |
| <i>RGS1</i>   | 5996  | -1754.9 | -729.8  | -1406.9 |
| <i>CDKN1A</i> | 1026  | -1836.5 | -45.4   | -29.5   |
| <i>SPRR3</i>  | 6707  | -2296.2 | -1388.1 | -231.6  |

FC: Fold change. N, normal; R, remission; A, active disease.

**Table S2. Gene ontology analysis of the 331 tissue vs. blood differential genes**

| <b>GO biological process complete</b>          | <b>Fold Enrichment</b> | <b>FDR-adjusted p value</b> |
|------------------------------------------------|------------------------|-----------------------------|
| multicellular organism development             | 1.8                    | 8.4E-13                     |
| anatomical structure development               | 1.8                    | 8.6E-13                     |
| developmental process                          | 1.7                    | 2.0E-11                     |
| response to stimulus                           | 1.5                    | 2.2E-11                     |
| cell surface receptor signaling pathway        | 2.3                    | 2.8E-11                     |
| multicellular organismal process               | 1.6                    | 4.0E-11                     |
| immune system process                          | 2.2                    | 4.9E-11                     |
| cellular response to stimulus                  | 1.6                    | 8.7E-11                     |
| system development                             | 1.8                    | 9.8E-11                     |
| tissue development                             | 2.5                    | 2.8E-10                     |
| animal organ development                       | 2.0                    | 7.9E-10                     |
| signal transduction                            | 1.7                    | 9.1E-10                     |
| cell communication                             | 1.6                    | 9.5E-10                     |
| regulation of response to stimulus             | 1.8                    | 1.2E-09                     |
| signaling                                      | 1.7                    | 1.3E-09                     |
| anatomical structure morphogenesis             | 2.2                    | 2.1E-09                     |
| cellular response to chemical stimulus         | 2.0                    | 4.3E-09                     |
| response to external stimulus                  | 2.3                    | 5.5E-09                     |
| response to organic substance                  | 2.0                    | 6.8E-09                     |
| regulation of protein phosphorylation          | 2.5                    | 8.4E-09                     |
| Unclassified                                   | 0.3                    | 8.6E-09                     |
| cell migration                                 | 3.0                    | 1.3E-08                     |
| positive regulation of biological process      | 1.6                    | 1.4E-08                     |
| immune response                                | 2.3                    | 2.7E-08                     |
| regulation of cell proliferation               | 2.3                    | 3.2E-08                     |
| cellular response to organic substance         | 2.1                    | 3.3E-08                     |
| cell chemotaxis                                | 6.2                    | 3.3E-08                     |
| positive regulation of protein phosphorylation | 2.8                    | 3.5E-08                     |
| regulation of cell death                       | 2.3                    | 4.0E-08                     |
| regulation of phosphorylation                  | 2.4                    | 4.1E-08                     |
| leukocyte migration                            | 4.3                    | 4.1E-08                     |
| cell differentiation                           | 1.8                    | 4.7E-08                     |
| epidermis development                          | 4.1                    | 4.8E-08                     |
| positive regulation of phosphorylation         | 2.8                    | 5.1E-08                     |
| locomotion                                     | 2.6                    | 5.2E-08                     |
| regulation of multicellular organismal process | 1.9                    | 5.2E-08                     |
| cellular process                               | 1.2                    | 5.3E-08                     |
| positive regulation of cellular process        | 1.6                    | 5.5E-08                     |

|                                                            |      |         |
|------------------------------------------------------------|------|---------|
| cell adhesion                                              | 2.9  | 7.3E-08 |
| positive regulation of phosphate metabolic process         | 2.6  | 7.5E-08 |
| cell motility                                              | 2.7  | 7.6E-08 |
| movement of cell or subcellular component                  | 2.4  | 7.6E-08 |
| response to stress                                         | 1.8  | 7.6E-08 |
| biological adhesion                                        | 2.9  | 7.7E-08 |
| positive regulation of phosphorus metabolic process        | 2.6  | 7.7E-08 |
| localization of cell                                       | 2.7  | 7.7E-08 |
| regulation of MAPK cascade                                 | 3.1  | 7.7E-08 |
| leukocyte chemotaxis                                       | 7.4  | 8.9E-08 |
| epithelium development                                     | 2.6  | 9.0E-08 |
| cellular developmental process                             | 1.8  | 1.1E-07 |
| positive regulation of response to stimulus                | 2.0  | 1.5E-07 |
| response to chemical                                       | 1.7  | 1.5E-07 |
| regulation of immune system process                        | 2.3  | 1.7E-07 |
| regulation of molecular function                           | 1.8  | 1.8E-07 |
| regulation of apoptotic process                            | 2.3  | 2.0E-07 |
| myeloid leukocyte migration                                | 8.1  | 2.3E-07 |
| regulation of programmed cell death                        | 2.3  | 2.4E-07 |
| regulation of phosphate metabolic process                  | 2.2  | 4.7E-07 |
| granulocyte migration                                      | 9.4  | 4.9E-07 |
| biological regulation                                      | 1.3  | 5.4E-07 |
| regulation of protein modification process                 | 2.1  | 5.5E-07 |
| regulation of multicellular organismal development         | 2.1  | 5.5E-07 |
| response to oxygen-containing compound                     | 2.3  | 6.3E-07 |
| positive regulation of MAPK cascade                        | 3.4  | 6.6E-07 |
| regulation of cellular protein metabolic process           | 1.9  | 7.7E-07 |
| regulation of phosphorus metabolic process                 | 2.1  | 7.8E-07 |
| regulation of protein metabolic process                    | 1.8  | 8.0E-07 |
| granulocyte chemotaxis                                     | 10.0 | 8.1E-07 |
| regulation of catalytic activity                           | 1.9  | 8.1E-07 |
| neutrophil migration                                       | 9.7  | 1.1E-06 |
| positive regulation of nitrogen compound metabolic process | 1.8  | 1.2E-06 |
| regulation of signaling                                    | 1.7  | 1.3E-06 |
| cell death                                                 | 2.5  | 1.3E-06 |
| programmed cell death                                      | 2.5  | 1.3E-06 |
| animal organ morphogenesis                                 | 2.7  | 1.3E-06 |
| positive regulation of cellular protein metabolic process  | 2.2  | 1.3E-06 |
| regulation of cell communication                           | 1.7  | 1.6E-06 |
| positive regulation of macromolecule metabolic process     | 1.8  | 1.7E-06 |
| positive regulation of cellular metabolic process          | 1.8  | 1.9E-06 |

|                                                          |      |         |
|----------------------------------------------------------|------|---------|
| positive regulation of catalytic activity                | 2.2  | 1.9E-06 |
| neutrophil chemotaxis                                    | 10.3 | 2.1E-06 |
| positive regulation of cell proliferation                | 2.6  | 2.4E-06 |
| skin development                                         | 3.7  | 2.7E-06 |
| positive regulation of multicellular organismal process  | 2.2  | 3.2E-06 |
| cornification                                            | 6.9  | 3.5E-06 |
| positive regulation of protein modification process      | 2.3  | 3.5E-06 |
| positive regulation of metabolic process                 | 1.7  | 4.3E-06 |
| regulation of developmental process                      | 1.9  | 4.3E-06 |
| regulation of cell migration                             | 2.8  | 4.3E-06 |
| positive regulation of protein metabolic process         | 2.1  | 5.2E-06 |
| response to lipid                                        | 2.6  | 5.3E-06 |
| regulation of signal transduction                        | 1.7  | 6.4E-06 |
| regulation of cell motility                              | 2.7  | 8.0E-06 |
| epithelial cell differentiation                          | 2.8  | 1.0E-05 |
| positive regulation of molecular function                | 2.0  | 1.1E-05 |
| response to endogenous stimulus                          | 2.2  | 1.3E-05 |
| regulation of cellular component movement                | 2.6  | 1.5E-05 |
| chemotaxis                                               | 3.1  | 1.5E-05 |
| taxis                                                    | 3.1  | 1.6E-05 |
| positive regulation of immune system process             | 2.4  | 1.7E-05 |
| cellular response to oxygen-containing compound          | 2.5  | 1.7E-05 |
| positive regulation of cell death                        | 2.8  | 1.7E-05 |
| response to drug                                         | 2.5  | 1.9E-05 |
| regulation of biological process                         | 1.2  | 2.0E-05 |
| defense response                                         | 2.2  | 2.1E-05 |
| regulation of ERK1 and ERK2 cascade                      | 4.1  | 2.3E-05 |
| response to cytokine                                     | 2.4  | 2.4E-05 |
| regulation of locomotion                                 | 2.5  | 2.7E-05 |
| positive regulation of programmed cell death             | 2.8  | 2.8E-05 |
| regulation of hydrolase activity                         | 2.2  | 3.2E-05 |
| regulation of cellular process                           | 1.3  | 3.6E-05 |
| regulation of intracellular signal transduction          | 1.9  | 3.6E-05 |
| response to growth factor                                | 3.0  | 3.9E-05 |
| positive regulation of intracellular signal transduction | 2.4  | 3.9E-05 |
| cellular response to endogenous stimulus                 | 2.3  | 4.3E-05 |
| response to hormone                                      | 2.4  | 4.3E-05 |
| monocyte chemotaxis                                      | 11.4 | 4.6E-05 |
| cell activation                                          | 2.3  | 5.0E-05 |
| positive regulation of apoptotic process                 | 2.8  | 6.1E-05 |
| epidermal cell differentiation                           | 3.7  | 6.1E-05 |

|                                                          |      |         |
|----------------------------------------------------------|------|---------|
| regulation of response to external stimulus              | 2.5  | 6.1E-05 |
| mononuclear cell migration                               | 10.9 | 6.2E-05 |
| chemokine-mediated signaling pathway                     | 7.7  | 7.1E-05 |
| cellular response to lipid                               | 3.0  | 7.2E-05 |
| inflammatory response                                    | 3.0  | 8.8E-05 |
| positive regulation of signal transduction               | 2.0  | 1.1E-04 |
| cellular response to growth factor stimulus              | 3.0  | 1.2E-04 |
| regulation of protein kinase activity                    | 2.5  | 1.3E-04 |
| negative regulation of cellular process                  | 1.5  | 1.3E-04 |
| negative regulation of biological process                | 1.5  | 1.3E-04 |
| response to steroid hormone                              | 3.5  | 1.3E-04 |
| cellular response to cytokine stimulus                   | 2.4  | 1.5E-04 |
| response to glucocorticoid                               | 5.2  | 1.7E-04 |
| positive regulation of cell migration                    | 3.0  | 2.2E-04 |
| regulation of protein serine/threonine kinase activity   | 2.9  | 2.5E-04 |
| response to organic cyclic compound                      | 2.3  | 2.7E-04 |
| positive regulation of cell communication                | 1.9  | 2.8E-04 |
| regulation of interleukin-1 production                   | 7.4  | 2.9E-04 |
| positive regulation of signaling                         | 1.9  | 2.9E-04 |
| positive regulation of ERK1 and ERK2 cascade             | 4.3  | 3.0E-04 |
| response to organonitrogen compound                      | 2.3  | 3.0E-04 |
| keratinocyte differentiation                             | 3.7  | 3.0E-04 |
| negative regulation of cell death                        | 2.3  | 3.1E-04 |
| regulation of kinase activity                            | 2.3  | 3.2E-04 |
| response to toxic substance                              | 2.8  | 3.3E-04 |
| negative regulation of apoptotic process                 | 2.3  | 3.3E-04 |
| positive regulation of cell motility                     | 2.9  | 3.8E-04 |
| positive regulation of developmental process             | 2.1  | 3.8E-04 |
| response to peptide                                      | 2.9  | 3.9E-04 |
| lymphocyte migration                                     | 8.2  | 4.0E-04 |
| negative regulation of programmed cell death             | 2.3  | 4.2E-04 |
| regulation of response to stress                         | 2.0  | 4.2E-04 |
| regulation of localization                               | 1.7  | 4.3E-04 |
| positive regulation of protein kinase activity           | 2.8  | 4.5E-04 |
| response to corticosteroid                               | 4.6  | 4.7E-04 |
| leukocyte activation                                     | 2.3  | 4.7E-04 |
| positive regulation of hydrolase activity                | 2.4  | 4.8E-04 |
| anatomical structure formation involved in morphogenesis | 2.3  | 5.1E-04 |
| regulation of immune response                            | 2.1  | 5.2E-04 |
| regulation of primary metabolic process                  | 1.4  | 5.3E-04 |
| positive regulation of cellular component movement       | 2.9  | 5.4E-04 |

|                                                         |      |         |
|---------------------------------------------------------|------|---------|
| nervous system development                              | 1.7  | 5.7E-04 |
| regulation of cell differentiation                      | 1.9  | 5.8E-04 |
| regulation of nitrogen compound metabolic process       | 1.4  | 5.8E-04 |
| regulation of biological quality                        | 1.5  | 7.4E-04 |
| response to nitrogen compound                           | 2.1  | 9.0E-04 |
| negative regulation of cell proliferation               | 2.4  | 9.3E-04 |
| positive regulation of locomotion                       | 2.7  | 1.0E-03 |
| positive regulation of epithelial cell proliferation    | 4.3  | 1.1E-03 |
| cytokine-mediated signaling pathway                     | 2.6  | 1.1E-03 |
| regulation of hemopoiesis                               | 2.9  | 1.2E-03 |
| regulation of MAP kinase activity                       | 3.1  | 1.2E-03 |
| regulation of transferase activity                      | 2.1  | 1.3E-03 |
| regulation of epithelial cell proliferation             | 3.2  | 1.3E-03 |
| positive regulation of kinase activity                  | 2.6  | 1.4E-03 |
| head development                                        | 2.3  | 1.4E-03 |
| cellular response to interleukin-1                      | 5.9  | 1.4E-03 |
| keratinization                                          | 3.7  | 1.4E-03 |
| enzyme linked receptor protein signaling pathway        | 2.3  | 2.0E-03 |
| rhythmic process                                        | 3.2  | 2.0E-03 |
| cellular response to organic cyclic compound            | 2.6  | 2.2E-03 |
| regulation of macromolecule metabolic process           | 1.3  | 2.2E-03 |
| response to abiotic stimulus                            | 2.0  | 2.5E-03 |
| regulation of smooth muscle cell proliferation          | 4.9  | 2.5E-03 |
| cellular response to hormone stimulus                   | 2.4  | 2.5E-03 |
| neurogenesis                                            | 1.8  | 2.7E-03 |
| negative regulation of response to stimulus             | 1.8  | 2.8E-03 |
| behavioral response to nicotine                         | 29.8 | 3.0E-03 |
| regulation of cell activation                           | 2.5  | 3.3E-03 |
| sensory organ development                               | 2.5  | 3.5E-03 |
| embryo development                                      | 2.1  | 3.5E-03 |
| negative regulation of multicellular organismal process | 2.0  | 3.9E-03 |
| cellular response to steroid hormone stimulus           | 3.7  | 4.0E-03 |
| regulation of leukocyte differentiation                 | 3.3  | 4.7E-03 |
| tube development                                        | 2.4  | 5.5E-03 |
| embryonic morphogenesis                                 | 2.4  | 5.6E-03 |
| myeloid leukocyte activation                            | 2.4  | 5.6E-03 |
| forebrain development                                   | 2.8  | 5.6E-03 |
| circulatory system development                          | 2.1  | 5.8E-03 |
| response to peptide hormone                             | 2.8  | 6.0E-03 |
| innate immune response                                  | 2.2  | 6.2E-03 |
| cell development                                        | 1.8  | 6.3E-03 |



|                                                           |     |         |
|-----------------------------------------------------------|-----|---------|
| neuron differentiation                                    | 2.0 | 6.5E-03 |
| regulation of inflammatory response                       | 2.7 | 6.7E-03 |
| regulation of leukocyte activation                        | 2.4 | 7.0E-03 |
| regulation of GTPase activity                             | 2.5 | 7.2E-03 |
| response to ketone                                        | 3.7 | 7.7E-03 |
| regulation of defense response                            | 2.1 | 8.0E-03 |
| regulation of epithelial cell migration                   | 3.6 | 8.0E-03 |
| central nervous system development                        | 2.0 | 8.1E-03 |
| regulation of receptor activity                           | 2.4 | 8.1E-03 |
| response to interleukin-1                                 | 4.6 | 8.3E-03 |
| response to lipopolysaccharide                            | 3.0 | 8.6E-03 |
| viral entry into host cell                                | 5.1 | 8.9E-03 |
| positive regulation of transferase activity               | 2.2 | 8.9E-03 |
| positive regulation of cell differentiation               | 2.1 | 8.9E-03 |
| regulation of metabolic process                           | 1.3 | 9.0E-03 |
| negative regulation of protein metabolic process          | 1.9 | 9.5E-03 |
| regulation of leukocyte cell-cell adhesion                | 2.8 | 1.0E-02 |
| hindlimb morphogenesis                                    | 8.5 | 1.0E-02 |
| localization                                              | 1.3 | 1.1E-02 |
| negative regulation of cellular protein metabolic process | 1.9 | 1.1E-02 |
| cell-cell signaling                                       | 1.9 | 1.1E-02 |
| generation of neurons                                     | 1.8 | 1.1E-02 |
| regulation of cytokine production                         | 2.3 | 1.1E-02 |
| response to other organism                                | 2.1 | 1.2E-02 |
| positive regulation of gene expression                    | 1.7 | 1.2E-02 |
| response to external biotic stimulus                      | 2.0 | 1.2E-02 |
| negative regulation of molecular function                 | 1.9 | 1.2E-02 |
| negative regulation of signal transduction                | 1.9 | 1.2E-02 |
| apoptotic process                                         | 2.0 | 1.3E-02 |
| positive regulation of leukocyte migration                | 4.3 | 1.3E-02 |
| regulation of neuron death                                | 2.9 | 1.3E-02 |
| cellular response to glucocorticoid stimulus              | 6.4 | 1.3E-02 |
| cell-cell adhesion                                        | 2.5 | 1.4E-02 |
| neuron development                                        | 2.1 | 1.4E-02 |
| adult behavior                                            | 3.9 | 1.4E-02 |
| appendage development                                     | 3.6 | 1.4E-02 |
| negative regulation of macromolecule metabolic process    | 1.5 | 1.4E-02 |
| limb development                                          | 3.6 | 1.4E-02 |
| chemical synaptic transmission, postsynaptic              | 5.3 | 1.4E-02 |
| regulation of cellular metabolic process                  | 1.3 | 1.4E-02 |
| appendage morphogenesis                                   | 3.9 | 1.4E-02 |

|                                                                     |      |         |
|---------------------------------------------------------------------|------|---------|
| limb morphogenesis                                                  | 3.9  | 1.4E-02 |
| response to molecule of bacterial origin                            | 2.8  | 1.4E-02 |
| positive regulation of cellular biosynthetic process                | 1.7  | 1.5E-02 |
| multi-organism process                                              | 1.6  | 1.5E-02 |
| positive regulation of MAP kinase activity                          | 3.0  | 1.5E-02 |
| positive regulation of biosynthetic process                         | 1.7  | 1.5E-02 |
| homeostatic process                                                 | 1.7  | 1.6E-02 |
| regeneration                                                        | 3.8  | 1.7E-02 |
| embryonic appendage morphogenesis                                   | 4.1  | 1.7E-02 |
| entry into host cell                                                | 4.5  | 1.7E-02 |
| embryonic limb morphogenesis                                        | 4.1  | 1.7E-02 |
| regulation of chemotaxis                                            | 3.5  | 1.7E-02 |
| entry into host                                                     | 4.5  | 1.8E-02 |
| entry into cell of other organism involved in symbiotic interaction | 4.5  | 1.8E-02 |
| negative regulation of protein serine/threonine kinase activity     | 4.1  | 1.8E-02 |
| cellular response to corticosteroid stimulus                        | 6.0  | 1.8E-02 |
| entry into other organism involved in symbiotic interaction         | 4.5  | 1.8E-02 |
| myeloid leukocyte mediated immunity                                 | 2.3  | 1.8E-02 |
| lymphocyte chemotaxis                                               | 7.3  | 1.8E-02 |
| response to tumor necrosis factor                                   | 2.9  | 1.8E-02 |
| positive regulation of chemotaxis                                   | 4.0  | 1.9E-02 |
| regulation of leukocyte proliferation                               | 3.2  | 1.9E-02 |
| negative regulation of phosphorus metabolic process                 | 2.3  | 1.9E-02 |
| response to corticotropin-releasing hormone                         | 31.3 | 2.0E-02 |
| positive regulation of interleukin-23 production                    | 31.3 | 2.0E-02 |
| cellular response to corticotropin-releasing hormone stimulus       | 31.3 | 2.0E-02 |
| cellular response to ketone                                         | 4.9  | 2.1E-02 |
| positive regulation of leukocyte differentiation                    | 3.9  | 2.2E-02 |
| positive regulation of cytokine production                          | 2.5  | 2.2E-02 |
| brain development                                                   | 2.1  | 2.2E-02 |
| response to biotic stimulus                                         | 2.0  | 2.3E-02 |
| embryonic hindlimb morphogenesis                                    | 9.0  | 2.3E-02 |
| ion transport                                                       | 1.7  | 2.4E-02 |
| odontogenesis                                                       | 4.3  | 2.4E-02 |
| negative regulation of nitrogen compound metabolic process          | 1.5  | 2.4E-02 |
| ion transmembrane transport                                         | 1.9  | 2.5E-02 |
| neuron projection development                                       | 2.2  | 2.5E-02 |
| calcium-mediated signaling                                          | 4.2  | 2.5E-02 |
| response to oxidative stress                                        | 2.5  | 2.5E-02 |
| behavior                                                            | 2.3  | 2.5E-02 |

|                                                                                        |      |         |
|----------------------------------------------------------------------------------------|------|---------|
| cellular response to vascular endothelial growth factor stimulus                       | 8.7  | 2.5E-02 |
| regulation of myeloid cell differentiation                                             | 3.1  | 2.5E-02 |
| positive regulation of transcription by RNA polymerase II                              | 1.8  | 2.6E-02 |
| negative regulation of cell communication                                              | 1.8  | 2.6E-02 |
| negative regulation of signaling                                                       | 1.8  | 2.6E-02 |
| leukocyte degranulation                                                                | 2.3  | 2.7E-02 |
| regulation of nucleotide-binding oligomerization domain containing 2 signaling pathway | 26.0 | 2.7E-02 |
| positive regulation of natural killer cell chemotaxis                                  | 26.0 | 2.7E-02 |
| response to nicotine                                                                   | 6.5  | 2.7E-02 |
| blood circulation                                                                      | 2.5  | 2.8E-02 |
| humoral immune response                                                                | 2.7  | 2.8E-02 |
| system process                                                                         | 1.6  | 2.8E-02 |
| face morphogenesis                                                                     | 8.4  | 2.8E-02 |
| regulation of lymphocyte activation                                                    | 2.3  | 2.8E-02 |
| positive regulation of cell activation                                                 | 2.5  | 2.8E-02 |
| positive regulation of hemopoiesis                                                     | 3.5  | 2.9E-02 |
| extracellular matrix organization                                                      | 2.7  | 2.9E-02 |
| face development                                                                       | 6.4  | 2.9E-02 |
| formation of primary germ layer                                                        | 4.1  | 2.9E-02 |
| extracellular structure organization                                                   | 2.7  | 3.0E-02 |
| positive regulation of protein serine/threonine kinase activity                        | 2.6  | 3.0E-02 |
| circulatory system process                                                             | 2.5  | 3.0E-02 |
| cellular response to nitrogen compound                                                 | 2.2  | 3.1E-02 |
| myeloid cell activation involved in immune response                                    | 2.2  | 3.1E-02 |
| negative regulation of phosphate metabolic process                                     | 2.2  | 3.1E-02 |
| response to antineoplastic agent                                                       | 4.5  | 3.2E-02 |
| excitatory postsynaptic potential                                                      | 5.1  | 3.3E-02 |
| pyrimidine nucleotide biosynthetic process                                             | 7.9  | 3.4E-02 |
| positive regulation of neutrophil migration                                            | 7.9  | 3.4E-02 |
| endoderm formation                                                                     | 6.1  | 3.4E-02 |
| response to corticosterone                                                             | 11.6 | 3.4E-02 |
| viral life cycle                                                                       | 3.1  | 3.6E-02 |
| positive regulation of nucleobase-containing compound metabolic process                | 1.6  | 3.6E-02 |
| negative regulation of phosphorylation                                                 | 2.3  | 3.6E-02 |
| endothelial cell differentiation                                                       | 5.0  | 3.8E-02 |
| negative regulation of protein phosphorylation                                         | 2.4  | 3.9E-02 |
| cellular response to organonitrogen compound                                           | 2.2  | 4.0E-02 |
| positive regulation of smooth muscle cell proliferation                                | 4.9  | 4.0E-02 |
| hair follicle development                                                              | 4.9  | 4.0E-02 |

|                                                           |      |         |
|-----------------------------------------------------------|------|---------|
| regulation of response to cytokine stimulus               | 3.3  | 4.0E-02 |
| positive regulation of GTPase activity                    | 2.4  | 4.0E-02 |
| muscle tissue development                                 | 2.7  | 4.1E-02 |
| positive regulation of macromolecule biosynthetic process | 1.6  | 4.1E-02 |
| intracellular receptor signaling pathway                  | 3.3  | 4.1E-02 |
| cellular component morphogenesis                          | 2.0  | 4.3E-02 |
| leukocyte mediated immunity                               | 2.0  | 4.4E-02 |
| regulation of circadian rhythm                            | 4.2  | 4.4E-02 |
| regulation of cell adhesion                               | 2.0  | 4.4E-02 |
| regulation of cellular component biogenesis               | 1.9  | 4.4E-02 |
| regulation of interleukin-1 alpha production              | 19.5 | 4.5E-02 |
| odontogenesis of dentin-containing tooth                  | 4.8  | 4.5E-02 |
| regulation of lymphocyte differentiation                  | 3.5  | 4.5E-02 |
| regulation of interleukin-23 production                   | 19.5 | 4.5E-02 |
| negative regulation of protein modification process       | 2.1  | 4.5E-02 |
| skin epidermis development                                | 4.8  | 4.5E-02 |
| regulation of natural killer cell chemotaxis              | 19.5 | 4.5E-02 |
| endoderm development                                      | 4.8  | 4.5E-02 |
| regulation of interleukin-1 beta production               | 5.7  | 4.5E-02 |
| response to bacterium                                     | 2.1  | 4.6E-02 |
| molting cycle process                                     | 4.7  | 4.7E-02 |
| hair cycle process                                        | 4.7  | 4.7E-02 |
| cytosolic calcium ion transport                           | 4.7  | 4.7E-02 |
| regulation of transcription by RNA polymerase II          | 1.6  | 4.8E-02 |
| head morphogenesis                                        | 7.0  | 4.9E-02 |
| animal organ regeneration                                 | 4.7  | 4.9E-02 |
| digestive tract development                               | 3.7  | 5.0E-02 |
| regulation of ossification                                | 3.2  | 5.0E-02 |
| renal system development                                  | 2.7  | 5.0E-02 |
| negative regulation of apoptotic signaling pathway        | 3.0  | 5.0E-02 |

**Table S3. Significant gene list from bulk CD3<sup>+</sup> RNA-seq of NL vs. EoE tissue lymphocytes**

| <b>Gene Symbol</b> | <b>Gene ID</b> | <b>Fold Change (Active Tissue vs Normal Tissue)</b> |
|--------------------|----------------|-----------------------------------------------------|
| <i>WRAP73</i>      | 49856          | 44.1                                                |
| <i>APITD1</i>      | 378708         | 38.5                                                |
| <i>PLOD1</i>       | 5351           | 123.9                                               |
| <i>EPHB2</i>       | 2048           | 48.2                                                |
| <i>SDC3</i>        | 9672           | 121.0                                               |
| <i>FCGR1A</i>      | 2209           | 44.3                                                |
| <i>S100A2</i>      | 6273           | 322.9                                               |
| <i>PRRX1</i>       | 5396           | 110.5                                               |
| <i>FMO2</i>        | 2327           | 129.9                                               |
| <i>ACBD6</i>       | 84320          | 135.1                                               |
| <i>NCF2</i>        | 4688           | 142.0                                               |
| <i>RGL1</i>        | 23179          | 178.5                                               |
| <i>G0S2</i>        | 50486          | 205.2                                               |
| <i>TAF1A</i>       | 9015           | 37.0                                                |
| <i>DISP1</i>       | 84976          | 89.6                                                |
| <i>OPN3</i>        | 23596          | 63.5                                                |
| <i>C2orf44</i>     | 80304          | 259.1                                               |
| <i>CHAC2</i>       | 494143         | 42.3                                                |
| <i>LGALS1</i>      | 29094          | 54.6                                                |
| <i>LINC00116</i>   | 205251         | 19.8                                                |
| <i>MERTK</i>       | 10461          | 223.8                                               |
| <i>FARP2</i>       | 9855           | 31.6                                                |
| <i>NICN1</i>       | 84276          | 29.1                                                |
| <i>NAT6</i>        | 24142          | 42.9                                                |
| <i>DNASE1L3</i>    | 1776           | 62.1                                                |
| <i>MITF</i>        | 4286           | 75.3                                                |
| <i>KIAA1524</i>    | 57650          | 47.3                                                |
| <i>ZBTB20-AS1</i>  | 100131117      | 37.8                                                |
| <i>CD86</i>        | 942            | 156.3                                               |
| <i>SLC35G2</i>     | 80723          | 23.0                                                |
| <i>IL20RB</i>      | 53833          | 106.5                                               |
| <i>GPR87</i>       | 53836          | 49.2                                                |
| <i>PPM1L</i>       | 151742         | 44.4                                                |
| <i>ETV5</i>        | 2119           | 168.3                                               |
| <i>TPRG1</i>       | 285386         | 55.4                                                |
| <i>APBB2</i>       | 323            | 63.2                                                |
| <i>CXCL1</i>       | 2919           | 509.4                                               |
| <i>HPGDS</i>       | 27306          | 864.3                                               |

|                     |           |        |
|---------------------|-----------|--------|
| <i>VCAN</i>         | 1462      | 89.3   |
| <i>IL5</i>          | 3567      | 1449.0 |
| <i>SH3RF2</i>       | 153769    | 320.6  |
| <i>SH3PXD2B</i>     | 285590    | 198.2  |
| <i>GFPT2</i>        | 9945      | 46.2   |
| <i>F13A1</i>        | 2162      | 1167.0 |
| <i>SMIM13</i>       | 221710    | 11.2   |
| <i>MRPS18B</i>      | 28973     | 189.0  |
| <i>SNORD84</i>      | 692199    | 13.0   |
| <i>UNC5CL</i>       | 222643    | 57.9   |
| <i>TREML2</i>       | 79865     | 170.5  |
| <i>VEGFA</i>        | 7422      | 134.1  |
| <i>RCAN2</i>        | 10231     | 151.5  |
| <i>CRISP3</i>       | 10321     | -200.3 |
| <i>COQ3</i>         | 51805     | 106.5  |
| <i>MTFR2</i>        | 113115    | 28.7   |
| <i>AIG1</i>         | 51390     | 95.9   |
| <i>RSPH3</i>        | 83861     | 156.7  |
| <i>ASL</i>          | 435       | 44.1   |
| <i>NCF1</i>         | 653361    | 68.7   |
| <i>NCF1C</i>        | 654817    | 43.9   |
| <i>FZD1</i>         | 8321      | 51.0   |
| <i>SLC25A13</i>     | 10165     | 108.5  |
| <i>CYP3A5</i>       | 1577      | 88.6   |
| <i>PCOLCE</i>       | 5118      | 23.7   |
| <i>ALKBH4</i>       | 54784     | 24.7   |
| <i>PLXNA4</i>       | 91584     | 151.2  |
| <i>CLEC5A</i>       | 23601     | 240.2  |
| <i>CTAGE15</i>      | 441294    | 46.2   |
| <i>CTAGE6</i>       | 340307    | 54.5   |
| <i>CTAGE4</i>       | 100128553 | 81.0   |
| <i>LOC155060</i>    | 155060    | 31.5   |
| <i>TMEM176B</i>     | 28959     | 135.3  |
| <i>PRKAG2-AS1</i>   | 100505483 | 24.1   |
| <i>LOC100287015</i> | 100287015 | 25.9   |
| <i>LYN</i>          | 4067      | 249.9  |
| <i>CYP7B1</i>       | 9420      | 154.9  |
| <i>ZNF251</i>       | 90987     | 158.6  |
| <i>KLF4</i>         | 9314      | 105.3  |
| <i>GSN</i>          | 2934      | 425.1  |
| <i>URM1</i>         | 81605     | 64.3   |

|                 |        |       |
|-----------------|--------|-------|
| <i>DBH</i>      | 1621   | 20.6  |
| <i>PLXDC2</i>   | 84898  | 848.4 |
| <i>PALD1</i>    | 27143  | 46.1  |
| <i>PLAU</i>     | 5328   | 359.1 |
| <i>ANKRD22</i>  | 118932 | 26.9  |
| <i>BLNK</i>     | 29760  | 61.6  |
| <i>CHST15</i>   | 51363  | 303.7 |
| <i>SPI1</i>     | 6688   | 20.4  |
| <i>TCN1</i>     | 6947   | 389.3 |
| <i>CCDC85B</i>  | 11007  | 13.1  |
| <i>SLCO2B1</i>  | 11309  | 115.9 |
| <i>OLR1</i>     | 4973   | 359.4 |
| <i>PTPRO</i>    | 5800   | 66.3  |
| <i>C12orf66</i> | 144577 | 119.3 |
| <i>PITPNM2</i>  | 57605  | 104.7 |
| <i>RILPL1</i>   | 353116 | 26.9  |
| <i>EBPL</i>     | 84650  | 81.7  |
| <i>SLC7A7</i>   | 9056   | 253.9 |
| <i>EFS</i>      | 10278  | 44.8  |
| <i>FOXA1</i>    | 3169   | 51.6  |
| <i>RGS6</i>     | 9628   | 131.2 |
| <i>STON2</i>    | 85439  | 189.0 |
| <i>SERPINA1</i> | 5265   | 204.2 |
| <i>SNHG10</i>   | 283596 | 15.1  |
| <i>LACTB</i>    | 114294 | 10.2  |
| <i>IGF1R</i>    | 3480   | 246.0 |
| <i>LRRK1</i>    | 79705  | 117.5 |
| <i>STUB1</i>    | 10273  | 19.5  |
| <i>ZNF174</i>   | 7727   | 98.8  |
| <i>LPCAT2</i>   | 54947  | 34.2  |
| <i>KATNB1</i>   | 10300  | 198.2 |
| <i>ENKD1</i>    | 84080  | 36.7  |
| <i>DDX28</i>    | 55794  | 39.8  |
| <i>ZNF821</i>   | 55565  | 18.5  |
| <i>NUDT7</i>    | 283927 | 23.0  |
| <i>TIMM22</i>   | 29928  | 109.4 |
| <i>RANGRF</i>   | 29098  | 126.0 |
| <i>RAB34</i>    | 83871  | 33.4  |
| <i>ADAP2</i>    | 55803  | 132.9 |
| <i>OMG</i>      | 4974   | 78.6  |
| <i>SLFN14</i>   | 342618 | 32.5  |

|                 |            |       |
|-----------------|------------|-------|
| <i>SPPL2B</i>   | 56928      | 29.2  |
| <i>EPOR</i>     | 2057       | 56.9  |
| <i>ZNF333</i>   | 84449      | 38.6  |
| <i>CYP4F12</i>  | 66002      | 30.7  |
| <i>MEF2B</i>    | 4207       | 15.8  |
| <i>CCNE1</i>    | 898        | 37.4  |
| <i>KCTD15</i>   | 79047      | 30.9  |
| <i>PPM1N</i>    | 147699     | 61.8  |
| <i>C5AR1</i>    | 728        | 306.2 |
| <i>SIGLEC10</i> | 89790      | 50.7  |
| <i>FPR1</i>     | 2357       | 144.1 |
| <i>FIZ1</i>     | 84922      | 68.2  |
| <i>ZNF256</i>   | 10172      | 123.0 |
| <i>ZSCAN18</i>  | 65982      | 72.4  |
| <i>NANP</i>     | 140838     | 37.8  |
| <i>HCK</i>      | 3055       | 93.8  |
| <i>ZNF341</i>   | 84905      | 29.4  |
| <i>CD40</i>     | 958        | 43.4  |
| <i>MIS18A</i>   | 54069      | 69.0  |
| <i>PCBP3</i>    | 54039      | 31.5  |
| <i>CDC45</i>    | 8318       | 67.2  |
| <i>PHF5A</i>    | 84844      | 54.2  |
| <i>CYP2D7</i>   | 1564       | 26.8  |
| <i>TLL12</i>    | 23170      | 91.4  |
| <i>SCUBE1</i>   | 80274      | 12.5  |
| <i>TLR8</i>     | 51311      | 197.7 |
| <i>TRO</i>      | 7216       | 50.9  |
| <i>FAM58A</i>   | 92002      | 69.9  |
| <i>SPRY3</i>    | 10251.chrX | 35.7  |
| <i>IL9R</i>     | 3581.chrX  | 66.9  |



**Table S4A. Tissue lymphocytes differentially expressed genes: remission vs. normal**

| <b>Gene Symbol</b>  | <b>Fold change</b> | <b>Regulation (Normal vs. Remission)</b> |
|---------------------|--------------------|------------------------------------------|
| <i>PLOD1</i>        | 91.7               | down                                     |
| <i>MST1P2</i>       | 12.4               | down                                     |
| <i>CIQB</i>         | 86.1               | down                                     |
| <i>TCEA3</i>        | 100.0              | down                                     |
| <i>GPATCH3</i>      | 16.5               | down                                     |
| <i>SDC3</i>         | 14.3               | down                                     |
| <i>FABP3</i>        | 8.5                | down                                     |
| <i>MTMR9LP</i>      | 27.1               | down                                     |
| <i>TSSK3</i>        | 50.7               | down                                     |
| <i>ADPRHL2</i>      | 40.1               | down                                     |
| <i>ST3GAL3</i>      | 32.7               | down                                     |
| <i>PTCH2</i>        | 28.2               | down                                     |
| <i>RAD54L</i>       | 10.9               | down                                     |
| <i>ZFYVE9</i>       | 116.8              | down                                     |
| <i>ORC1</i>         | 16.8               | down                                     |
| <i>LRRC42</i>       | 61.8               | down                                     |
| <i>CYB5RL</i>       | 277.7              | down                                     |
| <i>GNG12</i>        | 119.9              | down                                     |
| <i>MCOLN3</i>       | 42.5               | down                                     |
| <i>ALG14</i>        | 25.0               | down                                     |
| <i>FAM72B</i>       | 15.6               | down                                     |
| <i>FAM72D</i>       | 23.2               | down                                     |
| <i>SV2A</i>         | 20.3               | down                                     |
| <i>S100A2</i>       | 475.9              | down                                     |
| <i>BGLAP</i>        | 31.6               | up                                       |
| <i>OLFML2B</i>      | 100.1              | down                                     |
| <i>KIAA1614</i>     | 16.5               | down                                     |
| <i>NCF2</i>         | 65.5               | down                                     |
| <i>FAM72A</i>       | 15.0               | down                                     |
| <i>G0S2</i>         | 82.1               | down                                     |
| <i>DISP1</i>        | 16.5               | down                                     |
| <i>OPN3</i>         | 49.8               | down                                     |
| <i>ZNF496</i>       | 33.7               | down                                     |
| <i>FAM49A</i>       | 35.1               | down                                     |
| <i>C2orf44</i>      | 269.6              | down                                     |
| <i>CENPA</i>        | 10.2               | down                                     |
| <i>SLC8A1</i>       | 131.6              | down                                     |
| <i>LOC100506142</i> | 80.2               | down                                     |

|                     |       |      |
|---------------------|-------|------|
| <i>MEIS1</i>        | 31.7  | down |
| <i>PROM2</i>        | 99.8  | down |
| <i>GPAT2</i>        | 7.0   | down |
| <i>FNIP2</i>        | 12.3  | down |
| <i>1-Mar</i>        | 79.0  | down |
| <i>NEIL3</i>        | 8.4   | up   |
| <i>FRG1</i>         | 3.4   | up   |
| <i>CCDC127</i>      | 17.1  | down |
| <i>LOC100288152</i> | 18.0  | down |
| <i>CLPTM1L</i>      | 21.5  | down |
| <i>SDHAP3</i>       | 4.4   | up   |
| <i>TRIO</i>         | 152.3 | down |
| <i>ZNF622</i>       | 27.2  | down |
| <i>TARS</i>         | 7.0   | down |
| <i>RAD1</i>         | 18.0  | down |
| <i>SLC1A3</i>       | 12.4  | down |
| <i>LOC646719</i>    | 3.9   | down |
| <i>ZNF131</i>       | 2.2   | up   |
| <i>ARL15</i>        | 3.1   | down |
| <i>GAPT</i>         | 90.2  | down |
| <i>TRIM23</i>       | 7.9   | down |
| <i>LOC647859</i>    | 14.0  | down |
| <i>FCHO2</i>        | 55.5  | down |
| <i>ANKRA2</i>       | 19.1  | down |
| <i>F2RL1</i>        | 21.5  | down |
| <i>TMEM167A</i>     | 2.9   | down |
| <i>MEF2C</i>        | 158.7 | down |
| <i>LYSMD3</i>       | 2.2   | down |
| <i>SPATA9</i>       | 34.6  | down |
| <i>WDR36</i>        | 2.6   | down |
| <i>CEP120</i>       | 2.5   | up   |
| <i>RAPGEF6</i>      | 2.0   | up   |
| <i>ZCCHC10</i>      | 9.9   | down |
| <i>KLHL3</i>        | 9.5   | up   |
| <i>NDUFA2</i>       | 3.2   | down |
| <i>NR3C1</i>        | 2.1   | up   |
| <i>TCERG1</i>       | 2.3   | up   |
| <i>ABLIM3</i>       | 44.9  | down |
| <i>SLC26A2</i>      | 3.8   | down |
| <i>CSF1R</i>        | 10.1  | down |
| <i>CD74</i>         | 2.3   | down |

|                  |       |      |
|------------------|-------|------|
| <i>RPS14</i>     | 2.3   | down |
| <i>RBM22</i>     | 3.0   | down |
| <i>ZNF300</i>    | 32.7  | down |
| <i>CCDC69</i>    | 3.3   | up   |
| <i>FAT2</i>      | 98.1  | down |
| <i>SPARC</i>     | 95.5  | down |
| <i>FNDC9</i>     | 67.4  | down |
| <i>THG1L</i>     | 4.4   | down |
| <i>RNF145</i>    | 2.7   | down |
| <i>PTTG1</i>     | 2.8   | up   |
| <i>MIR146A</i>   | 5.9   | up   |
| <i>HMMR</i>      | 14.7  | down |
| <i>FBXW11</i>    | 2.2   | up   |
| <i>SIMC1</i>     | 4.5   | up   |
| <i>CLTB</i>      | 104.3 | down |
| <i>GRK6</i>      | 2.7   | up   |
| <i>PRR7</i>      | 18.3  | down |
| <i>LINC00847</i> | 10.4  | down |
| <i>ZFP62</i>     | 2.9   | down |
| <i>SERPINB1</i>  | 28.7  | down |
| <i>LINC01011</i> | 5.1   | up   |
| <i>HTATSFP2</i>  | 4.9   | up   |
| <i>F13A1</i>     | 46.7  | down |
| <i>SMIM13</i>    | 26.3  | down |
| <i>NOL7</i>      | 2.2   | up   |
| <i>E2F3</i>      | 4.6   | down |
| <i>CDKAL1</i>    | 3.0   | down |
| <i>HIST1H1C</i>  | 5.5   | down |
| <i>HIST1H4E</i>  | 52.4  | down |
| <i>HIST1H2BG</i> | 29.8  | up   |
| <i>BTN3A3</i>    | 2.2   | up   |
| <i>HIST1H2AK</i> | 16.3  | up   |
| <i>MRPS18B</i>   | 85.9  | down |
| <i>PPP1R18</i>   | 2.0   | up   |
| <i>LTA</i>       | 4.7   | up   |
| <i>LY6G5C</i>    | 27.5  | down |
| <i>SNORD52</i>   | 4.7   | down |
| <i>SKIV2L</i>    | 3.8   | up   |
| <i>FKBPL</i>     | 37.3  | up   |
| <i>PPT2</i>      | 2.8   | up   |
| <i>HLA-DQA2</i>  | 5.1   | down |

|                     |       |      |
|---------------------|-------|------|
| <i>PSMB9</i>        | 6.9   | down |
| <i>HLA-DOA</i>      | 3.6   | down |
| <i>RXRB</i>         | 2.0   | down |
| <i>LEMD2</i>        | 2.3   | up   |
| <i>FANCE</i>        | 30.2  | down |
| <i>ETV7</i>         | 16.6  | down |
| <i>FGD2</i>         | 53.6  | down |
| <i>GLO1</i>         | 5.7   | down |
| <i>ADCY10P1</i>     | 5.9   | up   |
| <i>USP49</i>        | 145.8 | down |
| <i>CNPY3</i>        | 3.3   | down |
| <i>GTPBP2</i>       | 14.2  | down |
| <i>VEGFA</i>        | 91.7  | down |
| <i>ENPP5</i>        | 9.0   | up   |
| <i>RCAN2</i>        | 27.8  | down |
| <i>RPS16P5</i>      | 2.3   | up   |
| <i>BAG2</i>         | 21.2  | down |
| <i>PHF3</i>         | 2.9   | up   |
| <i>OGFRL1</i>       | 3.4   | down |
| <i>C6orf147</i>     | 20.0  | down |
| <i>DDX43</i>        | 9.9   | down |
| <i>SLC17A5</i>      | 3.2   | up   |
| <i>HMGN3-AS1</i>    | 12.8  | down |
| <i>RRAGD</i>        | 6.5   | down |
| <i>MAP3K7</i>       | 2.1   | up   |
| <i>SLC16A10</i>     | 10.0  | down |
| <i>KIAA1919</i>     | 3.4   | down |
| <i>TRAF3IP2-AS1</i> | 13.5  | down |
| <i>MARCKS</i>       | 18.9  | down |
| <i>PKIB</i>         | 10.2  | down |
| <i>RNF217</i>       | 25.1  | down |
| <i>SGK1</i>         | 4.1   | down |
| <i>MAP7</i>         | 27.1  | down |
| <i>LOC100130476</i> | 2.9   | down |
| <i>GPR126</i>       | 20.2  | down |
| <i>AIG1</i>         | 65.1  | down |
| <i>RPS18P9</i>      | 47.0  | up   |
| <i>KATNA1</i>       | 4.8   | down |
| <i>RAET1G</i>       | 8.9   | down |
| <i>ULBP2</i>        | 55.4  | down |
| <i>PLEKHG1</i>      | 10.5  | up   |

|                  |       |      |
|------------------|-------|------|
| <i>TFB1M</i>     | 5.8   | up   |
| <i>ZDHC14</i>    | 4.6   | down |
| <i>RSPH3</i>     | 44.8  | down |
| <i>C6orf123</i>  | 3.1   | up   |
| <i>SUN1</i>      | 3.3   | down |
| <i>C7orf50</i>   | 14.8  | up   |
| <i>IQCE</i>      | 3.0   | up   |
| <i>RNF216P1</i>  | 9.5   | down |
| <i>CLK2P</i>     | 3.4   | down |
| <i>NFE2L3</i>    | 2.9   | up   |
| <i>CPVL</i>      | 132.7 | down |
| <i>LOC646762</i> | 61.6  | down |
| <i>MTURN</i>     | 8.2   | up   |
| <i>LOC401320</i> | 2.6   | up   |
| <i>AMPH</i>      | 46.8  | up   |
| <i>SNHG15</i>    | 5.4   | down |
| <i>FKBP9L</i>    | 7.5   | down |
| <i>14-Sep</i>    | 4.3   | up   |
| <i>MRPS17</i>    | 62.5  | down |
| <i>ASL</i>       | 97.8  | down |
| <i>POM121</i>    | 2.0   | up   |
| <i>NCF1</i>      | 25.6  | down |
| <i>WBSCR16</i>   | 27.7  | down |
| <i>NCF1C</i>     | 15.4  | down |
| <i>STYXL1</i>    | 14.5  | up   |
| <i>ABCB4</i>     | 6.7   | down |
| <i>FZD1</i>      | 61.0  | down |
| <i>SLC25A13</i>  | 172.7 | down |
| <i>ASNS</i>      | 3.3   | up   |
| <i>MGC72080</i>  | 40.7  | down |
| <i>MIR3609</i>   | 5.5   | down |
| <i>SMURF1</i>    | 3.2   | down |
| <i>CPSF4</i>     | 60.4  | down |
| <i>LAMTOR4</i>   | 4.4   | down |
| <i>GAL3ST4</i>   | 4.2   | down |
| <i>CLDN15</i>    | 25.3  | up   |
| <i>SYPL1</i>     | 3.8   | down |
| <i>PRKAR2B</i>   | 44.3  | down |
| <i>BCAP29</i>    | 2.1   | down |
| <i>TMEM168</i>   | 5.0   | down |
| <i>CAPZA2</i>    | 2.8   | down |

|                   |       |      |
|-------------------|-------|------|
| <i>ST7</i>        | 4.6   | up   |
| <i>ST7-OT3</i>    | 14.9  | up   |
| <i>CTTNBP2</i>    | 319.2 | down |
| <i>NAA38</i>      | 3.8   | down |
| <i>ARF5</i>       | 26.5  | down |
| <i>TPI1P2</i>     | 58.4  | up   |
| <i>AKR1B1</i>     | 17.3  | down |
| <i>CNOT4</i>      | 3.0   | up   |
| <i>C7orf73</i>    | 2.6   | down |
| <i>C7orf55</i>    | 12.5  | down |
| <i>TRBV7-7</i>    | 9.1   | down |
| <i>EPHA1</i>      | 14.7  | down |
| <i>EZH2</i>       | 3.0   | up   |
| <i>TMEM176A</i>   | 74.2  | down |
| <i>CDK5</i>       | 16.3  | down |
| <i>CHPF2</i>      | 2.6   | down |
| <i>GALNT11</i>    | 2.1   | up   |
| <i>PAXIP1-AS1</i> | 12.7  | down |
| <i>DNAJB6</i>     | 2.4   | up   |
| <i>MCPH1</i>      | 2.6   | up   |
| <i>FAM86B3P</i>   | 30.8  | down |
| <i>MICU3</i>      | 34.8  | down |
| <i>BMP1</i>       | 55.8  | down |
| <i>PIWIL2</i>     | 5.3   | up   |
| <i>SLC25A37</i>   | 14.5  | down |
| <i>ADAM28</i>     | 116.2 | down |
| <i>FZD3</i>       | 66.4  | down |
| <i>UBXN8</i>      | 25.7  | down |
| <i>FUT10</i>      | 2.5   | up   |
| <i>POLB</i>       | 4.5   | down |
| <i>LYN</i>        | 266.6 | down |
| <i>RAB2A</i>      | 2.5   | up   |
| <i>CYP7B1</i>     | 5.0   | down |
| <i>RRS1</i>       | 43.0  | down |
| <i>ADHFE1</i>     | 61.8  | down |
| <i>SNHG6</i>      | 4.8   | down |
| <i>GDAP1</i>      | 21.1  | down |
| <i>ZNF704</i>     | 13.8  | down |
| <i>IMPA1</i>      | 10.6  | down |
| <i>SNX16</i>      | 36.2  | down |
| <i>E2F5</i>       | 5.5   | down |

|                   |       |      |
|-------------------|-------|------|
| <i>RIPK2</i>      | 11.0  | down |
| <i>FAM92A1</i>    | 21.3  | down |
| <i>RBM12B-AS1</i> | 12.3  | down |
| <i>CCNE2</i>      | 24.8  | down |
| <i>COX6C</i>      | 3.7   | down |
| <i>OXR1</i>       | 5.9   | down |
| <i>EBAG9</i>      | 3.9   | up   |
| <i>FAM84B</i>     | 8.0   | down |
| <i>ASAP1</i>      | 2.4   | up   |
| <i>KCNQ3</i>      | 85.8  | down |
| <i>TMEM71</i>     | 18.1  | down |
| <i>GLI4</i>       | 39.5  | down |
| <i>ZFP41</i>      | 20.6  | down |
| <i>TOP1MT</i>     | 32.0  | down |
| <i>ZNF623</i>     | 3.0   | up   |
| <i>BREA2</i>      | 4.1   | down |
| <i>CYC1</i>       | 79.2  | down |
| <i>SLC52A2</i>    | 43.1  | down |
| <i>ZNF251</i>     | 136.3 | down |
| <i>COMMD5</i>     | 10.7  | down |
| <i>C9orf66</i>    | 14.0  | down |
| <i>KANK1</i>      | 159.8 | down |
| <i>AK3</i>        | 5.6   | down |
| <i>FLJ41200</i>   | 2.4   | up   |
| <i>NFIB</i>       | 79.4  | down |
| <i>CNTLN</i>      | 11.7  | down |
| <i>CDKN2B-AS1</i> | 20.1  | down |
| <i>C9orf72</i>    | 5.3   | down |
| <i>NDUFB6</i>     | 18.7  | down |
| <i>UBAP1</i>      | 2.2   | up   |
| <i>UNC13B</i>     | 39.0  | down |
| <i>RMRP</i>       | 4.0   | down |
| <i>MGC21881</i>   | 35.1  | down |
| <i>KGFLP2</i>     | 11.4  | down |
| <i>APBA1</i>      | 55.5  | down |
| <i>C9orf40</i>    | 11.2  | down |
| <i>NMRK1</i>      | 2.6   | up   |
| <i>CDK20</i>      | 61.3  | up   |
| <i>ZNF510</i>     | 2.6   | down |
| <i>HIATL2</i>     | 18.8  | up   |
| <i>GALNT12</i>    | 29.2  | down |

|                      |       |      |
|----------------------|-------|------|
| <i>INVS</i>          | 26.1  | up   |
| <i>TMEM246</i>       | 70.5  | down |
| <i>GRIN3A</i>        | 14.6  | down |
| <i>ABCA1</i>         | 3.0   | down |
| <i>FSD1L</i>         | 9.7   | down |
| <i>KLF4</i>          | 121.8 | down |
| <i>PALM2-AKAP2</i>   | 3.0   | down |
| <i>AKAP2</i>         | 3.0   | down |
| <i>LPAR1</i>         | 31.8  | down |
| <i>PTGR1</i>         | 169.6 | down |
| <i>DNAJC25-GNG10</i> | 4.3   | down |
| <i>GNG10</i>         | 3.9   | down |
| <i>SNX30</i>         | 34.0  | down |
| <i>ZNF618</i>        | 47.3  | down |
| <i>AKNA</i>          | 2.3   | up   |
| <i>TNFSF15</i>       | 51.0  | down |
| <i>TRAF1</i>         | 2.3   | up   |
| <i>GSN</i>           | 93.3  | down |
| <i>GGTA1P</i>        | 62.4  | down |
| <i>C9orf16</i>       | 3.9   | up   |
| <i>CIZ1</i>          | 2.4   | down |
| <i>SWI5</i>          | 13.7  | down |
| <i>URM1</i>          | 39.7  | down |
| <i>ODF2</i>          | 4.5   | up   |
| <i>USP20</i>         | 3.0   | down |
| <i>FNBP1</i>         | 2.1   | up   |
| <i>UCK1</i>          | 22.4  | up   |
| <i>ADAMTSL2</i>      | 3.0   | up   |
| <i>SARDH</i>         | 38.1  | down |
| <i>RXRA</i>          | 3.4   | down |
| <i>SSNA1</i>         | 57.2  | down |
| <i>TPRN</i>          | 26.9  | down |
| <i>NELFB</i>         | 12.3  | up   |
| <i>ADARB2</i>        | 60.8  | down |
| <i>PFKP</i>          | 2.7   | up   |
| <i>CALML3</i>        | 66.2  | down |
| <i>DHTKD1</i>        | 17.3  | down |
| <i>OPTN</i>          | 2.5   | up   |
| <i>MCM10</i>         | 48.0  | down |
| <i>PTER</i>          | 2.7   | down |
| <i>PLXDC2</i>        | 237.4 | down |



|                     |      |      |
|---------------------|------|------|
| <i>LOC100130992</i> | 9.8  | up   |
| <i>PIP4K2A</i>      | 2.2  | up   |
| <i>MASTL</i>        | 21.9 | down |
| <i>ACBD5</i>        | 2.0  | up   |
| <i>RAB18</i>        | 3.3  | down |
| <i>MTPAP</i>        | 7.2  | down |
| <i>ZEB1</i>         | 3.7  | up   |
| <i>PARD3</i>        | 45.9 | down |

**Table S4B. Tissue lymphocytes differentially expressed genes: remission vs. active**

| <b>Gene Symbol</b> | <b>Fold change</b> | <b>Regulation (Remission vs. Active)</b> |
|--------------------|--------------------|------------------------------------------|
| <i>ATAD3A</i>      | 15.9               | down                                     |
| <i>PER3</i>        | 16.7               | up                                       |
| <i>LZIC</i>        | 2.8                | up                                       |
| <i>APITD1-CORT</i> | 10.6               | down                                     |
| <i>NBPF3</i>       | 2.7                | up                                       |
| <i>SRSF10</i>      | 2.0                | up                                       |
| <i>MAN1C1</i>      | 4.0                | down                                     |
| <i>LIN28A</i>      | 6.7                | down                                     |
| <i>LOC644961</i>   | 24.6               | down                                     |
| <i>SNORD99</i>     | 4.0                | down                                     |
| <i>TAF12</i>       | 3.2                | down                                     |
| <i>TFAP2E</i>      | 32.5               | down                                     |
| <i>EXO5</i>        | 6.0                | down                                     |
| <i>PTCH2</i>       | 12.0               | up                                       |
| <i>CCDC17</i>      | 17.5               | down                                     |
| <i>DMBX1</i>       | 4.1                | down                                     |
| <i>CYB5RL</i>      | 38.0               | up                                       |
| <i>FAM73A</i>      | 2.1                | up                                       |
| <i>CTBS</i>        | 2.4                | down                                     |
| <i>RBMXL1</i>      | 2.5                | up                                       |
| <i>GFII1</i>       | 2.7                | down                                     |
| <i>EXTL2</i>       | 12.8               | up                                       |
| <i>GNAT2</i>       | 6.5                | down                                     |
| <i>CSF1</i>        | 2.2                | down                                     |
| <i>DRAM2</i>       | 2.1                | down                                     |
| <i>TRIM45</i>      | 2.2                | up                                       |
| <i>ANKRD34A</i>    | 12.6               | down                                     |
| <i>GPR89C</i>      | 2.4                | down                                     |
| <i>GBA</i>         | 2.3                | up                                       |
| <i>ASHIL-AS1</i>   | 27.7               | down                                     |
| <i>KIAA0907</i>    | 2.6                | down                                     |
| <i>APOA1BP</i>     | 10.6               | down                                     |
| <i>GPATCH4</i>     | 3.5                | down                                     |
| <i>ISG20L2</i>     | 2.1                | up                                       |
| <i>FCER1A</i>      | 36.7               | up                                       |
| <i>CCDC19</i>      | 17.7               | down                                     |
| <i>USP21</i>       | 12.9               | down                                     |
| <i>APOA2</i>       | 7.4                | down                                     |

|                     |      |      |
|---------------------|------|------|
| <i>RGS5</i>         | 6.4  | down |
| <i>MPC2</i>         | 2.7  | down |
| <i>XCL2</i>         | 2.1  | up   |
| <i>PRRX1</i>        | 46.4 | down |
| <i>SCARNA3</i>      | 17.0 | down |
| <i>ZBTB41</i>       | 2.2  | up   |
| <i>TMCC2</i>        | 5.7  | down |
| <i>CR1</i>          | 15.0 | down |
| <i>KCTD3</i>        | 5.9  | up   |
| <i>LYPLAL1</i>      | 3.6  | down |
| <i>DISP1</i>        | 5.5  | down |
| <i>LOC101926980</i> | 3.2  | up   |
| <i>LIN9</i>         | 6.2  | down |
| <i>ABCB10</i>       | 2.3  | up   |
| <i>EDARADD</i>      | 9.5  | up   |
| <i>SMYD3</i>        | 14.8 | down |
| <i>SH3BP5L</i>      | 13.6 | down |
| <i>SH3YL1</i>       | 2.1  | up   |
| <i>DPYSL5</i>       | 3.1  | up   |
| <i>DHX57</i>        | 2.7  | down |
| <i>MORN2</i>        | 25.1 | down |
| <i>DYNC2LI1</i>     | 11.3 | down |
| <i>SNRPG</i>        | 2.7  | up   |
| <i>LBX2-AS1</i>     | 10.9 | down |
| <i>ANKRD23</i>      | 16.7 | down |
| <i>TSGA10</i>       | 6.0  | down |
| <i>LOC100499194</i> | 8.1  | down |
| <i>ZEB2-AS1</i>     | 6.9  | down |
| <i>GALNT5</i>       | 50.0 | down |
| <i>ERMN</i>         | 73.2 | down |
| <i>FASTKD1</i>      | 3.5  | up   |
| <i>COL5A2</i>       | 31.1 | down |
| <i>SDPR</i>         | 4.7  | down |
| <i>GCSHP3</i>       | 14.4 | down |
| <i>CHPF</i>         | 27.3 | down |
| <i>MTERFD2</i>      | 4.1  | down |
| <i>TATDN2</i>       | 2.5  | down |
| <i>ZNF662</i>       | 2.8  | down |
| <i>RBM5</i>         | 2.2  | down |
| <i>CHDH</i>         | 25.8 | down |
| <i>IL17RB</i>       | 68.8 | down |

|                   |        |      |
|-------------------|--------|------|
| <i>ASB14</i>      | 3.2    | down |
| <i>FLNB-AS1</i>   | 2.4    | up   |
| <i>LINC00971</i>  | 2.2    | up   |
| <i>ALCAM</i>      | 3.3    | up   |
| <i>PVRL3</i>      | 4.3    | down |
| <i>SPICE1</i>     | 2.2    | down |
| <i>ZBTB20-AS1</i> | 21.6   | down |
| <i>CD80</i>       | 7.9    | down |
| <i>SEC22A</i>     | 5.5    | down |
| <i>TFDP2</i>      | 2.8    | up   |
| <i>GYG1</i>       | 2.7    | down |
| <i>B3GNT5</i>     | 2.9    | up   |
| <i>KLHL6</i>      | 2.2    | down |
| <i>MAP3K13</i>    | 2.2    | up   |
| <i>LEPREL1</i>    | 12.5   | up   |
| <i>PDE6B</i>      | 5.8    | down |
| <i>DGKQ</i>       | 5.7    | down |
| <i>IDUA</i>       | 10.5   | up   |
| <i>SH3BP2</i>     | 2.2    | up   |
| <i>AFAP1</i>      | 2.8    | down |
| <i>LCORL</i>      | 2.5    | up   |
| <i>KLHL5</i>      | 2.1    | down |
| <i>RBM47</i>      | 5.3    | up   |
| <i>GUF1</i>       | 2.4    | down |
| <i>EXOC1</i>      | 2.5    | up   |
| <i>UTP3</i>       | 2.6    | down |
| <i>CXCL3</i>      | 14.2   | down |
| <i>AREG</i>       | 2.3    | up   |
| <i>C4orf21</i>    | 5.0    | down |
| <i>TNIP3</i>      | 3.0    | down |
| <i>SLC10A7</i>    | 3.4    | down |
| <i>KIAA0922</i>   | 2.4    | down |
| <i>TARS</i>       | 2.3    | up   |
| <i>ERCC8</i>      | 7.2    | up   |
| <i>ADAMTS6</i>    | 26.3   | down |
| <i>ANKDD1B</i>    | 8.0    | down |
| <i>ARSB</i>       | 3.4    | down |
| <i>FER</i>        | 2.6    | up   |
| <i>MCC</i>        | 2.9    | up   |
| <i>IL5</i>        | 1464.1 | down |
| <i>IL13</i>       | 159.0  | down |

|                             |      |      |
|-----------------------------|------|------|
| <i>C5orf24</i>              | 2.5  | down |
| <i>CD14</i>                 | 9.3  | down |
| <i>PCDHGB3</i>              | 11.2 | down |
| <i>ABLIM3</i>               | 14.1 | up   |
| <i>HAVCR2</i>               | 2.6  | down |
| <i>TTC1</i>                 | 2.3  | down |
| <i>SH3PXD2B</i>             | 6.6  | down |
| <i>PRR7</i>                 | 10.9 | up   |
| <i>TRIM52-AS1</i>           | 2.6  | up   |
| <i>NOL7</i>                 | 2.3  | down |
| <i>TDP2</i>                 | 2.2  | up   |
| <i>GMNN</i>                 | 3.0  | up   |
| <i>PGBD1</i>                | 25.3 | down |
| <i>UBD</i>                  | 27.4 | down |
| <i>HLA-J</i>                | 2.0  | down |
| <i>GTF2H4</i>               | 4.4  | down |
| <i>ATP6V1G2-<br/>DDX39B</i> | 8.9  | up   |
| <i>ABHD16A</i>              | 3.1  | down |
| <i>DDAH2</i>                | 8.1  | down |
| <i>PPT2</i>                 | 10.4 | up   |
| <i>AGER</i>                 | 12.3 | down |
| <i>COL11A2</i>              | 13.3 | down |
| <i>BAK1</i>                 | 3.8  | down |
| <i>TREM1</i>                | 7.1  | down |
| <i>ENPP5</i>                | 8.8  | down |
| <i>IL17A</i>                | 10.1 | up   |
| <i>FAM135A</i>              | 2.8  | up   |
| <i>OGFRL1</i>               | 4.1  | up   |
| <i>DCBLD1</i>               | 7.6  | down |
| <i>AKAP7</i>                | 3.3  | up   |
| <i>OR2A4</i>                | 4.6  | down |
| <i>CITED2</i>               | 2.7  | up   |
| <i>EPM2A</i>                | 12.2 | down |
| <i>RSPH3</i>                | 3.5  | down |
| <i>C7orf50</i>              | 10.3 | down |
| <i>GPR146</i>               | 10.4 | down |
| <i>AMZ1</i>                 | 19.8 | down |
| <i>DNAH11</i>               | 16.0 | down |
| <i>LOC646762</i>            | 19.5 | up   |
| <i>RP9</i>                  | 4.7  | down |
| <i>AMPH</i>                 | 15.9 | down |

|                     |      |      |
|---------------------|------|------|
| <i>AEBP1</i>        | 21.3 | down |
| <i>TMED4</i>        | 3.4  | up   |
| <i>FKBP9L</i>       | 8.5  | up   |
| <i>ZNF107</i>       | 2.7  | up   |
| <i>INTS4L2</i>      | 4.0  | down |
| <i>PMS2P8</i>       | 2.7  | up   |
| <i>NCF1B</i>        | 3.8  | down |
| <i>LOC441259</i>    | 2.8  | up   |
| <i>PMS2L2</i>       | 6.1  | up   |
| <i>CCL26</i>        | 71.4 | down |
| <i>CNPY4</i>        | 8.3  | down |
| <i>PILRA</i>        | 3.5  | down |
| <i>GIGYF1</i>       | 2.2  | up   |
| <i>SLC12A9</i>      | 4.1  | up   |
| <i>ALKBH4</i>       | 10.0 | down |
| <i>BCAP29</i>       | 2.0  | up   |
| <i>ST7-AS1</i>      | 6.5  | down |
| <i>LRRC4</i>        | 18.5 | down |
| <i>METTL2B</i>      | 2.6  | up   |
| <i>PLXNA4</i>       | 49.6 | down |
| <i>OR2A7</i>        | 7.3  | down |
| <i>GIMAP4</i>       | 2.2  | down |
| <i>GIMAP2</i>       | 2.0  | down |
| <i>VIPR2</i>        | 2.7  | down |
| <i>CLN8</i>         | 8.0  | down |
| <i>BMP1</i>         | 2.1  | up   |
| <i>EGR3</i>         | 2.1  | up   |
| <i>CLU</i>          | 9.1  | down |
| <i>CYP7B1</i>       | 31.5 | down |
| <i>LOC100132891</i> | 2.3  | up   |
| <i>ZC2HC1A</i>      | 2.8  | down |
| <i>SNX16</i>        | 5.9  | up   |
| <i>INTS8</i>        | 2.2  | up   |
| <i>PTDSS1</i>       | 2.3  | down |
| <i>FLJ45248</i>     | 33.9 | down |
| <i>SLC52A2</i>      | 3.0  | up   |
| <i>PPP1R16A</i>     | 21.0 | up   |
| <i>C9orf72</i>      | 2.1  | up   |
| <i>NDUFB6</i>       | 2.1  | up   |
| <i>CD72</i>         | 4.2  | up   |
| <i>SPAG8</i>        | 5.7  | down |

|                     |      |      |
|---------------------|------|------|
| <i>GNE</i>          | 2.2  | up   |
| <i>LOC100132352</i> | 2.8  | up   |
| <i>UNQ6494</i>      | 38.2 | down |
| <i>INVS</i>         | 6.6  | down |
| <i>FPGS</i>         | 4.9  | down |
| <i>LOC100289019</i> | 2.8  | down |
| <i>SH3GLB2</i>      | 5.6  | up   |
| <i>MED27</i>        | 2.2  | up   |
| <i>SURF2</i>        | 5.2  | down |
| <i>SNHG7</i>        | 3.1  | up   |
| <i>ARRDC1</i>       | 2.4  | up   |
| <i>MRC1</i>         | 10.0 | down |
| <i>MRC1</i>         | 12.6 | down |
| <i>MASTL</i>        | 2.2  | up   |
| <i>ZNF37A</i>       | 2.1  | down |

**Table S5. Demographic and clinical information of participants**

|                                       | <b>*Normal</b> | <b>Remission</b> | <b>Active</b> |
|---------------------------------------|----------------|------------------|---------------|
| n                                     | 5              | 6                | 11            |
| Gender (male %)                       | 40%            | 83%              | 73%           |
| Race (Caucasian %)                    | 82%            | 83%              | 80%           |
| Hispanic%                             | 0%             | 0%               | 0%            |
| Age (years)                           | 12 ± 6.3       | 12 ± 4.6         | 10 ± 4.7      |
| PPI-confirmed EoE                     | 0% (N/A)       | 33%              | 64%           |
| History of PPI usage                  | 20%            | 83%              | 82%           |
| Asthma                                | 20%            | 33%              | 27%           |
| Allergic rhinitis                     | 20%            | 67%              | 45%           |
| Hay fever                             | 20%            | 17%              | 36%           |
| Eczema                                | 40%            | 50%              | 64%           |
| Urticaria                             | 0%             | 50%              | 55%           |
| Food Allergy                          | 0%             | 67%              | 64%           |
| Food anaphylaxis                      | 0%             | 33%              | 27%           |
| Tissue eosinophilia<br>(peak EOS/HPF) | 0.0 ± 0.0      | 4.8 ± 5.6        | 76 ± 55       |
| PPI                                   | 20%            | 83%              | 73%           |
| Swallowed steroid                     | 0%             | 50%              | 18%           |
| H1 Block                              | 20%            | 50%              | 27%           |
| H2 Block                              | 20%            | 0%               | 9%            |

PPI: Proton pump inhibitor; quantitative data represented in “Mean ± SD”.

EOS/HPF: Eosinophils/high power field

\* The normal control were those patients with gastrointestinal symptoms without EoE history and were found to have a completely negative endoscopy and biopsy histology.



**Table S6. The cohort of 1114 PCA genes contributing to the major variations of T1-T8**

| <b>Gene Symbol</b> | <b>p value</b> |
|--------------------|----------------|
| <i>IL1R2</i>       | 3.03E-08       |
| <i>IL1R1</i>       | 1.98E-14       |
| <i>FOXP3</i>       | 1.04E-14       |
| <i>UGP2</i>        | 1.44E-10       |
| <i>GPR15</i>       | 1.32E-09       |
| <i>IKZF2</i>       | 5.04E-06       |
| <i>NAB1</i>        | 1.43E-07       |
| <i>IL10</i>        | 2.48E-15       |
| <i>AC017002.1</i>  | 2.24E-08       |
| <i>LINC01943</i>   | 4.11E-11       |
| <i>CD28</i>        | 6.49E-16       |
| <i>PEL11</i>       | 2.04E-10       |
| <i>IL6R</i>        | 1.35E-08       |
| <i>TBC1D4</i>      | 2.61E-44       |
| <i>IL2RA</i>       | 7.07E-14       |
| <i>ZC2HC1A</i>     | 9.86E-18       |
| <i>CTLA4</i>       | 5.88E-28       |
| <i>MAF</i>         | 9.58E-47       |
| <i>PHACTR2</i>     | 4.74E-21       |
| <i>PHTF2</i>       | 2.13E-28       |
| <i>CD4</i>         | 8.62E-46       |
| <i>CARD16</i>      | 9.12E-13       |
| <i>CASP1</i>       | 4.85E-17       |
| <i>TIGIT</i>       | 3.83E-12       |
| <i>GLCC11</i>      | 1.38E-10       |
| <i>ICOS</i>        | 1.80E-39       |
| <i>SLAMF1</i>      | 6.45E-15       |
| <i>MAST4</i>       | 9.90E-11       |
| <i>GPX1</i>        | 7.72E-10       |
| <i>BATF</i>        | 3.99E-12       |
| <i>NDUFV2</i>      | 4.60E-15       |
| <i>ZNF451</i>      | 0.00357        |
| <i>RHBDD2</i>      | 9.84E-08       |
| <i>CENPC</i>       | 0.000137       |
| <i>BHLHE40-AS1</i> | 1.69E-09       |
| <i>OAF</i>         | 0.0061         |
| <i>EML4</i>        | 4.76E-15       |
| <i>PPCS</i>        | 0.0172         |

|                     |          |
|---------------------|----------|
| <i>PDS5B</i>        | 0.0345   |
| <i>CLDND1</i>       | 5.23E-13 |
| <i>ITGAL</i>        | 2.50E-08 |
| <i>ATG14</i>        | 0.0222   |
| <i>LPXN</i>         | 6.76E-05 |
| <i>PNISR</i>        | 1.37E-10 |
| <i>TAB2</i>         | 1.35E-05 |
| <i>ADAR</i>         | 3.27E-06 |
| <i>ANKRD12</i>      | 1.96E-13 |
| <i>RBPJ</i>         | 4.99E-11 |
| <i>SERINC3</i>      | 2.43E-05 |
| <i>ATXN1</i>        | 2.84E-09 |
| <i>FAS</i>          | 3.18E-05 |
| <i>DUSP10</i>       | 3.81E-08 |
| <i>DUSP4</i>        | 5.71E-14 |
| <i>ARID5B</i>       | 4.50E-13 |
| <i>G3BP2</i>        | 1.70E-07 |
| <i>UBE2B</i>        | 2.64E-12 |
| <i>TPP1</i>         | 6.39E-08 |
| <i>CTSC</i>         | 1.84E-14 |
| <i>TNFRSF1B</i>     | 1.24E-10 |
| <i>MIR4435-2HG</i>  | 8.74E-11 |
| <i>CYTOR</i>        | 5.49E-12 |
| <i>NAMPTP1</i>      | 6.90E-07 |
| <i>NAMPT</i>        | 4.92E-19 |
| <i>CNTLN</i>        | 0.00551  |
| <i>FNTA</i>         | 3.92E-08 |
| <i>RP11-484L7.2</i> | 0.000375 |
| <i>AC012668.1</i>   | 2.17E-05 |
| <i>TLK1</i>         | 9.56E-11 |
| <i>HNRNPLL</i>      | 3.80E-12 |
| <i>LIMA1</i>        | 0.000157 |
| <i>SH3BGRL</i>      | 0.00105  |
| <i>SIRPG</i>        | 1.84E-06 |
| <i>IL2RB</i>        | 4.32E-07 |
| <i>MYO5A</i>        | 1.70E-07 |
| <i>DYNC1I2</i>      | 0.0388   |
| <i>PIM2</i>         | 1.06E-17 |
| <i>ZIM2-AS1</i>     | 8.47E-06 |
| <i>TTN</i>          | 2.85E-12 |
| <i>TTN-AS1</i>      | 0.0425   |

|                      |          |
|----------------------|----------|
| <i>FOXO1</i>         | 4.13E-09 |
| <i>NCOA1</i>         | 0.000364 |
| <i>LAPTM4A</i>       | 4.59E-06 |
| <i>ATP1B1</i>        | 5.02E-05 |
| <i>TNIP3</i>         | 9.07E-07 |
| <i>TNFRSF9</i>       | 6.91E-05 |
| <i>ABHD17B</i>       | 0.00762  |
| <i>CCR4</i>          | 0.00241  |
| <i>PBXIP1</i>        | 1.37E-08 |
| <i>SKAP1</i>         | 2.10E-06 |
| <i>RP11-205M5.3</i>  | 0.00776  |
| <i>POP4</i>          | 0.037    |
| <i>KIAA0922</i>      | 0.0278   |
| <i>GEMIN8</i>        | 8.06E-08 |
| <i>PRDX2</i>         | 7.18E-06 |
| <i>UBR4</i>          | 7.02E-06 |
| <i>RDX</i>           | 0.00785  |
| <i>ARHGAP5</i>       | 0.0155   |
| <i>COPS3</i>         | 0.021    |
| <i>CEP350</i>        | 0.000633 |
| <i>COX5A</i>         | 0.00863  |
| <i>ERI1</i>          | 0.000609 |
| <i>RAC1</i>          | 0.000346 |
| <i>SREK1</i>         | 9.06E-05 |
| <i>RRS1</i>          | 0.04     |
| <i>UBXN1</i>         | 1.38E-06 |
| <i>CD5</i>           | 3.20E-09 |
| <i>MTMR6</i>         | 0.0302   |
| <i>DYNLRB1</i>       | 0.00312  |
| <i>SPPL2A</i>        | 0.000111 |
| <i>NUP58</i>         | 0.0346   |
| <i>DCP2</i>          | 0.015    |
| <i>ATAD2</i>         | 0.00329  |
| <i>ENTPD1</i>        | 0.000109 |
| <i>MIR205HG</i>      | 0.00111  |
| <i>LINC01902</i>     | 0.00333  |
| <i>RP11-473M20.5</i> | 0.00278  |
| <i>NDUFV2P1</i>      | 0.0294   |
| <i>RNU6-1152P</i>    | 0.000196 |
| <i>LINC02119</i>     | 1.28E-05 |
| <i>JAK3</i>          | 4.85E-07 |

|                      |          |
|----------------------|----------|
| <i>IL5</i>           | 7.71E-10 |
| <i>HPGDS</i>         | 2.40E-43 |
| <i>IL13</i>          | 8.80E-26 |
| <i>IL17RB</i>        | 2.67E-49 |
| <i>EGLN3</i>         | 3.96E-13 |
| <i>LIF</i>           | 0.000292 |
| <i>GPR42</i>         | 0.000579 |
| <i>FFAR3</i>         | 8.77E-06 |
| <i>RP11-884K10.7</i> | 1.84E-11 |
| <i>PLN</i>           | 1.22E-10 |
| <i>PPARG</i>         | 3.54E-20 |
| <i>IL1RL1</i>        | 2.21E-05 |
| <i>CHDH</i>          | 1.99E-09 |
| <i>LINC01229</i>     | 0.00336  |
| <i>GK</i>            | 3.55E-23 |
| <i>RP11-242C19.2</i> | 2.69E-06 |
| <i>CD109</i>         | 3.36E-07 |
| <i>GNAQ</i>          | 1.75E-13 |
| <i>TNFRSF11A</i>     | 1.52E-06 |
| <i>HLF</i>           | 1.89E-06 |
| <i>TESPA1</i>        | 2.39E-15 |
| <i>ALAS1</i>         | 8.56E-07 |
| <i>GATA3</i>         | 2.17E-44 |
| <i>PTGS2</i>         | 0.0277   |
| <i>KIAA0408</i>      | 0.00333  |
| <i>PLIN2</i>         | 1.42E-65 |
| <i>DSE</i>           | 0.000145 |
| <i>ACSL4</i>         | 2.26E-13 |
| <i>YPEL2</i>         | 2.47E-08 |
| <i>DUSP6</i>         | 1.43E-22 |
| <i>TIMP1</i>         | 4.91E-08 |
| <i>PDLIM5</i>        | 7.84E-19 |
| <i>ADAM19</i>        | 1.86E-33 |
| <i>KLRB1</i>         | 7.74E-67 |
| <i>PTPN13</i>        | 1.67E-07 |
| <i>CD40LG</i>        | 1.55E-14 |
| <i>LINC00892</i>     | 1.46E-12 |
| <i>RNA5SP493</i>     | 0.00385  |
| <i>AC091492.2</i>    | 6.86E-11 |
| <i>AHR</i>           | 1.02E-21 |
| <i>GAB2</i>          | 0.000215 |

|                     |          |
|---------------------|----------|
| <i>CD38</i>         | 0.00369  |
| <i>TNFSF10</i>      | 1.36E-05 |
| <i>SCD</i>          | 1.09E-07 |
| <i>EFHD2</i>        | 4.78E-05 |
| <i>C1orf162</i>     | 0.0034   |
| <i>IL26</i>         | 2.66E-06 |
| <i>FURIN</i>        | 5.65E-06 |
| <i>GPR35</i>        | 8.42E-07 |
| <i>SESN3</i>        | 1.80E-10 |
| <i>ST6GAL1</i>      | 3.09E-08 |
| <i>PSMD1</i>        | 7.74E-07 |
| <i>FAH</i>          | 0.0324   |
| <i>HS6ST1</i>       | 4.48E-11 |
| <i>SH3TC1</i>       | 5.30E-06 |
| <i>LAGE3</i>        | 7.31E-05 |
| <i>HK2</i>          | 4.61E-10 |
| <i>GDE1</i>         | 0.00635  |
| <i>KIF3A</i>        | 3.93E-08 |
| <i>MAP3K8</i>       | 3.73E-08 |
| <i>LMO4</i>         | 2.69E-16 |
| <i>BHLHE40</i>      | 4.05E-11 |
| <i>ALOX5AP</i>      | 7.99E-37 |
| <i>EPC1</i>         | 6.86E-06 |
| <i>NR3C1</i>        | 5.37E-21 |
| <i>DGKH</i>         | 0.00195  |
| <i>ITGAV</i>        | 1.65E-10 |
| <i>DPY19L1</i>      | 0.00484  |
| <i>SLC27A2</i>      | 0.00138  |
| <i>FAM35BP</i>      | 0.000925 |
| <i>ST13</i>         | 4.08E-08 |
| <i>SLC5A3</i>       | 1.79E-08 |
| <i>MRPS6</i>        | 1.11E-29 |
| <i>SLC4A7</i>       | 6.86E-11 |
| <i>THADA</i>        | 6.32E-05 |
| <i>BLM</i>          | 5.19E-05 |
| <i>MRPL14</i>       | 3.46E-13 |
| <i>SDCBP</i>        | 1.21E-10 |
| <i>GLO1</i>         | 1.15E-11 |
| <i>MRFAP1</i>       | 0.0187   |
| <i>IFNAR2</i>       | 0.000578 |
| <i>RP11-56B16.5</i> | 0.0224   |

|                      |          |
|----------------------|----------|
| <i>RN7SL653P</i>     | 0.00353  |
| <i>TGFBR3</i>        | 8.09E-33 |
| <i>IL4R</i>          | 0.000295 |
| <i>TAB3</i>          | 0.000962 |
| <i>FKBP2</i>         | 0.00542  |
| <i>INPP4B</i>        | 5.28E-07 |
| <i>RAPGEF2</i>       | 0.000199 |
| <i>TTC17</i>         | 0.000293 |
| <i>NDFIP2</i>        | 5.79E-09 |
| <i>RNMT</i>          | 0.00513  |
| <i>KIF20B</i>        | 0.00319  |
| <i>C5orf22</i>       | 0.0287   |
| <i>KLHL6</i>         | 1.09E-06 |
| <i>TIMM9</i>         | 4.20E-08 |
| <i>MGAT5</i>         | 0.0101   |
| <i>PHLDA1</i>        | 2.15E-42 |
| <i>STK24</i>         | 1.20E-05 |
| <i>TOR1AIP1</i>      | 5.59E-07 |
| <i>SEC11C</i>        | 0.00486  |
| <i>MTSS1</i>         | 0.00914  |
| <i>NF2</i>           | 0.000367 |
| <i>DNAJC3</i>        | 8.30E-06 |
| <i>NUDT4</i>         | 1.08E-07 |
| <i>PFDN2</i>         | 0.0013   |
| <i>HSP90B1</i>       | 8.16E-13 |
| <i>SELENOF</i>       | 0.027    |
| <i>C10orf128</i>     | 1.42E-06 |
| <i>ZEB2</i>          | 8.34E-16 |
| <i>RP11-136F16.1</i> | 8.11E-06 |
| <i>PPP2R2C</i>       | 0.000835 |
| <i>DGKE</i>          | 2.74E-06 |
| <i>RP11-107E5.3</i>  | 2.08E-10 |
| <i>TENM4</i>         | 0.014    |
| <i>ITGA4</i>         | 2.49E-06 |
| <i>TBC1D15</i>       | 0.0014   |
| <i>GMPR2</i>         | 0.00376  |
| <i>DCAF4L1</i>       | 0.00128  |
| <i>ITGA2</i>         | 6.96E-09 |
| <i>GPR180</i>        | 0.00113  |
| <i>NFATC3</i>        | 7.12E-06 |
| <i>RP11-96D1.11</i>  | 5.70E-12 |

|                 |          |
|-----------------|----------|
| <i>CD200R1</i>  | 5.73E-14 |
| <i>VIPAS39</i>  | 3.25E-06 |
| <i>BFSP2</i>    | 0.000221 |
| <i>ARHGAP18</i> | 0.0035   |
| <i>SOCS1</i>    | 2.49E-12 |
| <i>TRIP12</i>   | 0.000102 |
| <i>EAPP</i>     | 0.0215   |
| <i>MFSD1</i>    | 0.0441   |
| <i>RER1</i>     | 5.79E-05 |
| <i>E2F3</i>     | 0.0236   |
| <i>DGUOK</i>    | 0.0165   |
| <i>CCDC86</i>   | 0.00884  |
| <i>BAZ1A</i>    | 0.00152  |
| <i>FNBP1</i>    | 9.91E-06 |
| <i>STXBP3</i>   | 0.0158   |
| <i>NDUFB4</i>   | 0.0459   |
| <i>USP15</i>    | 1.19E-08 |
| <i>SELENOT</i>  | 1.22E-12 |
| <i>FILIP1L</i>  | 0.0203   |
| <i>GAB3</i>     | 0.000532 |
| <i>UBA6</i>     | 0.0334   |
| <i>ELOVL5</i>   | 2.00E-13 |
| <i>AZI2</i>     | 0.0458   |
| <i>SRPK1</i>    | 0.00997  |
| <i>CDK1</i>     | 1.49E-05 |
| <i>BCL2L11</i>  | 1.76E-06 |
| <i>DROSHA</i>   | 0.00535  |
| <i>ZC3H11A</i>  | 0.00324  |
| <i>MRPS31</i>   | 0.000843 |
| <i>WBP11</i>    | 0.0228   |
| <i>TM9SF3</i>   | 0.000363 |
| <i>MTDH</i>     | 0.000578 |
| <i>TIMMDC1</i>  | 0.00164  |
| <i>TIMM23</i>   | 0.00612  |
| <i>VEGFB</i>    | 4.60E-08 |
| <i>TDG</i>      | 0.00408  |
| <i>LYSMD4</i>   | 0.00265  |
| <i>RAD23B</i>   | 0.0485   |
| <i>SEC61G</i>   | 0.00724  |
| <i>DENND1B</i>  | 2.32E-06 |
| <i>LYSMD3</i>   | 6.36E-20 |

|                       |          |
|-----------------------|----------|
| <i>TRIM59</i>         | 0.0242   |
| <i>POLR3E</i>         | 0.0311   |
| <i>FBXO34</i>         | 0.000453 |
| <i>CFAP36</i>         | 0.00164  |
| <i>REEP3</i>          | 4.77E-07 |
| <i>NEK10</i>          | 0.00906  |
| <i>PDCL3</i>          | 9.49E-06 |
| <i>PRDX1</i>          | 9.44E-08 |
| <i>LIMS1</i>          | 2.42E-05 |
| <i>SPATS2L</i>        | 1.11E-09 |
| <i>FDFT1</i>          | 0.0112   |
| <i>DNAJC2</i>         | 0.0158   |
| <i>COMMD1</i>         | 0.0201   |
| <i>EIF2AK1</i>        | 0.00275  |
| <i>RP11-643M14.1</i>  | 0.00523  |
| <i>TMEM167A</i>       | 2.98E-05 |
| <i>SNX5</i>           | 5.08E-07 |
| <i>RAP1A</i>          | 1.14E-07 |
| <i>MRPS21</i>         | 0.0416   |
| <i>B9D2</i>           | 0.0483   |
| <i>CCDC66</i>         | 0.00382  |
| <i>SF3B1</i>          | 3.96E-06 |
| <i>PPM1G</i>          | 0.00585  |
| <i>RP1-257A7.4</i>    | 0.0256   |
| <i>POLI</i>           | 0.027    |
| <i>MAT2B</i>          | 0.0128   |
| <i>PRKACB</i>         | 0.000349 |
| <i>NCK1</i>           | 0.0167   |
| <i>POGLUT1</i>        | 0.012    |
| <i>FXR1</i>           | 4.18E-05 |
| <i>FAM172A</i>        | 0.0268   |
| <i>WDR70</i>          | 0.0388   |
| <i>ELOF1</i>          | 0.0242   |
| <i>SH2D6</i>          | 0.00799  |
| <i>ABI1</i>           | 0.000122 |
| <i>EIF4ENIF1</i>      | 0.000452 |
| <i>SRSF11</i>         | 3.12E-06 |
| <i>RBM39</i>          | 8.29E-06 |
| <i>RP11-1042B17.3</i> | 0.00967  |
| <i>ITK</i>            | 9.73E-23 |
| <i>EIF3D</i>          | 0.00144  |



|                   |          |
|-------------------|----------|
| <i>MOB3A</i>      | 1.18E-09 |
| <i>DNAJC9-AS1</i> | 0.0489   |
| <i>PMPCB</i>      | 0.00615  |
| <i>EHMT1</i>      | 0.0221   |
| <i>FGFR1</i>      | 0.00296  |
| <i>BCAM</i>       | 0.0191   |
| <i>TMED5</i>      | 9.30E-06 |
| <i>MARCH7</i>     | 0.0119   |
| <i>ATP11B</i>     | 0.00119  |
| <i>FRA10AC1</i>   | 0.00161  |
| <i>S100A11</i>    | 3.49E-11 |
| <i>HIGD2A</i>     | 0.0111   |
| <i>RPL37</i>      | 4.36E-23 |
| <i>RPS29</i>      | 5.11E-06 |
| <i>RPS25</i>      | 9.31E-09 |
| <i>RPS3</i>       | 4.30E-06 |
| <i>RPS3A</i>      | 3.10E-06 |
| <i>RPL34</i>      | 9.97E-07 |
| <i>RPL36A</i>     | 9.48E-10 |
| <i>RPS12</i>      | 3.34E-06 |
| <i>RPL35A</i>     | 1.17E-10 |
| <i>RPL9</i>       | 3.46E-15 |
| <i>RPS18</i>      | 6.13E-06 |
| <i>RPLP1</i>      | 5.73E-10 |
| <i>AC010970.2</i> | 5.69E-06 |
| <i>RPL27A</i>     | 8.24E-08 |
| <i>RPL31</i>      | 3.18E-10 |
| <i>RPS28</i>      | 9.16E-24 |
| <i>RPL23</i>      | 1.82E-14 |
| <i>RPL39</i>      | 2.10E-21 |
| <i>RPS7</i>       | 5.37E-07 |
| <i>RPS15</i>      | 3.03E-11 |
| <i>RPL27</i>      | 4.86E-06 |
| <i>RPL32</i>      | 1.03E-07 |
| <i>RPS11</i>      | 3.58E-06 |
| <i>RPL15</i>      | 1.51E-16 |
| <i>RPL30</i>      | 5.65E-07 |
| <i>RPS20</i>      | 1.28E-06 |
| <i>RPS15A</i>     | 1.03E-09 |
| <i>RPS21</i>      | 4.13E-14 |
| <i>RPL11</i>      | 2.69E-16 |

|                   |          |
|-------------------|----------|
| <i>RPL38</i>      | 5.30E-08 |
| <i>RPS23</i>      | 1.28E-13 |
| <i>RPLP0</i>      | 1.62E-06 |
| <i>RPS10</i>      | 1.27E-06 |
| <i>UBA52</i>      | 1.19E-06 |
| <i>RPL35</i>      | 2.05E-10 |
| <i>FAU</i>        | 1.33E-07 |
| <i>RPL18</i>      | 5.15E-13 |
| <i>RPS8</i>       | 1.37E-06 |
| <i>RPL6</i>       | 2.20E-11 |
| <i>RPL12</i>      | 4.03E-06 |
| <i>RPS16</i>      | 3.53E-19 |
| <i>RPL7A</i>      | 4.36E-06 |
| <i>EEF1G</i>      | 9.26E-10 |
| <i>RPS17</i>      | 8.24E-12 |
| <i>RPS24</i>      | 3.44E-34 |
| <i>RPL7</i>       | 1.33E-07 |
| <i>RPL36</i>      | 5.01E-18 |
| <i>RPL26</i>      | 2.24E-09 |
| <i>SERF2</i>      | 1.00E-11 |
| <i>AC004057.1</i> | 2.22E-07 |
| <i>RPS26</i>      | 4.90E-08 |
| <i>ATP5G2</i>     | 9.84E-08 |
| <i>RPL5</i>       | 9.97E-20 |
| <i>RPS13</i>      | 3.59E-11 |
| <i>ATP5L</i>      | 6.47E-16 |
| <i>RPL4</i>       | 2.50E-17 |
| <i>RAC2</i>       | 3.09E-09 |
| <i>CLIC1</i>      | 4.61E-09 |
| <i>SI00A4</i>     | 7.20E-13 |
| <i>HLA-C</i>      | 6.49E-06 |
| <i>HLA-B</i>      | 3.91E-07 |
| <i>HLA-A</i>      | 5.61E-10 |
| <i>ACTB</i>       | 4.21E-06 |
| <i>B2M</i>        | 5.92E-07 |
| <i>IL32</i>       | 2.07E-33 |
| <i>ACTG1</i>      | 1.86E-07 |
| <i>EIF1</i>       | 1.11E-06 |
| <i>PTMA</i>       | 6.63E-07 |
| <i>TRBC1</i>      | 7.49E-10 |
| <i>TRAC</i>       | 2.34E-06 |

|                 |          |
|-----------------|----------|
| <i>SH3BGRL3</i> | 2.14E-10 |
| <i>COX6A1</i>   | 1.68E-08 |
| <i>TMA7</i>     | 2.13E-06 |
| <i>GAPDH</i>    | 8.07E-09 |
| <i>MYL6</i>     | 2.27E-15 |
| <i>UBB</i>      | 2.08E-10 |
| <i>UBC</i>      | 3.07E-13 |
| <i>H3F3A</i>    | 1.37E-06 |
| <i>PFN1</i>     | 5.75E-10 |
| <i>TPM3</i>     | 2.80E-08 |
| <i>CD3D</i>     | 3.30E-06 |
| <i>UBL5</i>     | 2.46E-07 |
| <i>YWHAB</i>    | 1.72E-10 |
| <i>ARPC3</i>    | 0.000167 |
| <i>FXD5</i>     | 9.96E-09 |
| <i>PPIA</i>     | 1.51E-16 |
| <i>ELOB</i>     | 2.86E-06 |
| <i>YBX1</i>     | 0.00265  |
| <i>LCP1</i>     | 3.80E-06 |
| <i>CAPZA1</i>   | 2.49E-06 |
| <i>YWHAZ</i>    | 2.83E-07 |
| <i>IL2RG</i>    | 2.84E-09 |
| <i>RASSF2</i>   | 0.00183  |
| <i>YWHAE</i>    | 1.86E-07 |
| <i>OAZ1</i>     | 3.58E-08 |
| <i>CALM2</i>    | 1.71E-09 |
| <i>ARPC4</i>    | 7.50E-07 |
| <i>ARPC1B</i>   | 3.20E-06 |
| <i>LPTM5</i>    | 2.20E-08 |
| <i>NDUFA13</i>  | 5.69E-07 |
| <i>SKP1</i>     | 1.21E-06 |
| <i>CNBP</i>     | 5.67E-07 |
| <i>NDUFA4</i>   | 9.26E-07 |
| <i>TRAPPC1</i>  | 0.000522 |
| <i>TRBC2</i>    | 4.26E-06 |
| <i>GABARAP</i>  | 2.67E-06 |
| <i>NDUFA1</i>   | 6.09E-08 |
| <i>CCND2</i>    | 2.16E-10 |
| <i>ATP5F1</i>   | 0.000119 |
| <i>GMFG</i>     | 9.16E-08 |
| <i>CCNI</i>     | 1.54E-11 |

|                  |          |
|------------------|----------|
| <i>UQCR10</i>    | 0.000293 |
| <i>NACA</i>      | 4.77E-07 |
| <i>ENO1</i>      | 4.32E-07 |
| <i>BUB3</i>      | 2.54E-06 |
| <i>ACTR3</i>     | 2.23E-07 |
| <i>NDUFB8</i>    | 0.000546 |
| <i>CLEC2B</i>    | 6.18E-07 |
| <i>HNRNPA2B1</i> | 1.32E-09 |
| <i>BRK1</i>      | 0.000767 |
| <i>UCP2</i>      | 4.93E-12 |
| <i>POMP</i>      | 1.04E-08 |
| <i>PSME2</i>     | 0.00905  |
| <i>MRPL33</i>    | 5.94E-06 |
| <i>SSR4</i>      | 2.57E-07 |
| <i>ISCU</i>      | 0.000255 |
| <i>GTF3C6</i>    | 0.00644  |
| <i>SERINC5</i>   | 1.32E-09 |
| <i>TMBIM4</i>    | 4.13E-06 |
| <i>FKBP1A</i>    | 3.89E-17 |
| <i>CIB1</i>      | 3.08E-06 |
| <i>SRP14</i>     | 1.96E-07 |
| <i>SEC61B</i>    | 5.94E-06 |
| <i>DCTN6</i>     | 0.000173 |
| <i>DYNLL1</i>    | 8.70E-07 |
| <i>RHOF</i>      | 1.48E-05 |
| <i>CAPG</i>      | 5.07E-07 |
| <i>OSTF1</i>     | 4.42E-08 |
| <i>ARF6</i>      | 5.08E-08 |
| <i>YWHAQ</i>     | 7.48E-05 |
| <i>HMGB1</i>     | 8.05E-07 |
| <i>HMGB1P6</i>   | 0.0257   |
| <i>NDUFC1</i>    | 0.0437   |
| <i>DAD1</i>      | 1.11E-06 |
| <i>SNRPN</i>     | 0.0177   |
| <i>UBE2V1</i>    | 1.32E-07 |
| <i>SUMO2</i>     | 1.90E-09 |
| <i>SURF4</i>     | 0.0188   |
| <i>UBE2D3</i>    | 1.16E-11 |
| <i>IQGAP1</i>    | 1.75E-08 |
| <i>PARP1</i>     | 0.00378  |
| <i>SETX</i>      | 0.0472   |

|                  |          |
|------------------|----------|
| <i>DOCK8</i>     | 5.76E-15 |
| <i>GAS5</i>      | 6.64E-08 |
| <i>MBNL1</i>     | 1.53E-15 |
| <i>RAB27A</i>    | 5.24E-06 |
| <i>RAN</i>       | 4.01E-07 |
| <i>RAB2A</i>     | 0.0433   |
| <i>PPIB</i>      | 6.01E-10 |
| <i>PSMA2</i>     | 1.77E-05 |
| <i>DERL2</i>     | 0.0237   |
| <i>MRPL18</i>    | 8.00E-10 |
| <i>PGAM1</i>     | 0.000184 |
| <i>ATP5J</i>     | 1.40E-06 |
| <i>UBE2L3</i>    | 0.0464   |
| <i>PRNP</i>      | 0.0173   |
| <i>ZFR</i>       | 0.00092  |
| <i>PA2G4</i>     | 3.39E-05 |
| <i>WTAP</i>      | 5.99E-06 |
| <i>CTBP1</i>     | 6.98E-06 |
| <i>C6orf62</i>   | 2.17E-07 |
| <i>ALDOA</i>     | 1.30E-07 |
| <i>PTEN</i>      | 0.0308   |
| <i>HIGD1A</i>    | 3.20E-09 |
| <i>ETNK1</i>     | 0.0407   |
| <i>ZFAS1</i>     | 0.0109   |
| <i>SNHG8</i>     | 2.46E-07 |
| <i>AZIN1</i>     | 8.36E-08 |
| <i>POLR2K</i>    | 0.0315   |
| <i>NEK1</i>      | 0.00457  |
| <i>LAT</i>       | 1.79E-08 |
| <i>RNASEK</i>    | 2.86E-08 |
| <i>MEF2A</i>     | 0.00492  |
| <i>XRCC6</i>     | 3.91E-05 |
| <i>SUSD6</i>     | 1.98E-05 |
| <i>PSMD12</i>    | 0.000204 |
| <i>ITPR1</i>     | 2.63E-06 |
| <i>ATP6V1F</i>   | 0.00575  |
| <i>KHDRBS1</i>   | 0.0179   |
| <i>ATP6V0E1</i>  | 1.96E-07 |
| <i>ATP5O</i>     | 0.00157  |
| <i>RN7SL132P</i> | 0.0476   |
| <i>NDUFV1</i>    | 0.000708 |

|                |          |
|----------------|----------|
| <i>ARF4</i>    | 0.000505 |
| <i>CMTM3</i>   | 3.18E-06 |
| <i>ISG15</i>   | 1.37E-06 |
| <i>PDIA6</i>   | 0.000613 |
| <i>WDR1</i>    | 7.49E-05 |
| <i>CPEB4</i>   | 4.07E-06 |
| <i>SOD1</i>    | 4.78E-09 |
| <i>CCT8</i>    | 6.63E-07 |
| <i>DBF4</i>    | 0.0018   |
| <i>METTL5</i>  | 0.0214   |
| <i>BST2</i>    | 0.00401  |
| <i>NDUFB3</i>  | 0.0306   |
| <i>COX8A</i>   | 0.00685  |
| <i>UQCRCQ</i>  | 0.0165   |
| <i>DBNL</i>    | 0.0304   |
| <i>NDUFS6</i>  | 0.0176   |
| <i>UBE2K</i>   | 1.50E-07 |
| <i>FAM120A</i> | 0.00747  |
| <i>CDV3</i>    | 1.26E-09 |
| <i>GOLGA8B</i> | 4.15E-06 |
| <i>GOLGA8A</i> | 2.36E-07 |
| <i>PBX4</i>    | 0.0107   |
| <i>CEBPZ</i>   | 0.000412 |
| <i>NFKBIZ</i>  | 1.11E-32 |
| <i>TANK</i>    | 4.81E-09 |
| <i>FAM107B</i> | 2.03E-07 |
| <i>NFKB1</i>   | 1.74E-07 |
| <i>DDX21</i>   | 2.37E-06 |
| <i>CDK17</i>   | 0.00553  |
| <i>ENY2</i>    | 8.78E-06 |
| <i>NCL</i>     | 7.96E-08 |
| <i>MT1X</i>    | 0.000457 |
| <i>PTP4A2</i>  | 1.40E-06 |
| <i>CSNK1A1</i> | 8.13E-06 |
| <i>IRF2BP2</i> | 2.09E-07 |
| <i>RBMS1</i>   | 1.13E-06 |
| <i>BFAR</i>    | 0.000325 |
| <i>CTR9</i>    | 0.000486 |
| <i>HNRNPH3</i> | 0.0374   |
| <i>GPS1</i>    | 3.13E-10 |
| <i>GOLPH3</i>  | 0.00184  |

|                    |          |
|--------------------|----------|
| <i>GNG5</i>        | 0.00111  |
| <i>LRRC8D</i>      | 0.00179  |
| <i>MOB4</i>        | 0.000997 |
| <i>COX17</i>       | 4.13E-07 |
| <i>SNRPB2</i>      | 0.0291   |
| <i>C14orf166</i>   | 0.000282 |
| <i>PSMB1</i>       | 1.63E-05 |
| <i>NME2</i>        | 0.000117 |
| <i>ORMDL3</i>      | 6.17E-08 |
| <i>ALKBH5</i>      | 0.0305   |
| <i>TNFAIP8</i>     | 1.79E-07 |
| <i>PPP6C</i>       | 0.0342   |
| <i>PRELID3B</i>    | 0.000654 |
| <i>NDUFC2</i>      | 2.13E-05 |
| <i>RNF6</i>        | 0.00147  |
| <i>UBE2L6</i>      | 0.0495   |
| <i>HNRNPM</i>      | 0.00384  |
| <i>RRM1</i>        | 0.0116   |
| <i>NDUFA6</i>      | 0.0119   |
| <i>RBX1</i>        | 1.03E-06 |
| <i>RPN2</i>        | 8.91E-05 |
| <i>NEAT1</i>       | 3.42E-07 |
| <i>KCTD20</i>      | 0.00189  |
| <i>LPIN2</i>       | 1.39E-05 |
| <i>GBP2</i>        | 0.00255  |
| <i>GBP3</i>        | 0.00413  |
| <i>CDKN1B</i>      | 3.66E-07 |
| <i>PSMD14</i>      | 0.0015   |
| <i>PPP1R18</i>     | 0.016    |
| <i>ZRANB2</i>      | 0.0152   |
| <i>NUDC</i>        | 1.91E-06 |
| <i>CCT4</i>        | 4.70E-12 |
| <i>AC107081.5</i>  | 0.0429   |
| <i>VASP</i>        | 0.00482  |
| <i>CTB-43P18.1</i> | 0.00397  |
| <i>SELENOK</i>     | 7.07E-12 |
| <i>FTH1</i>        | 1.51E-13 |
| <i>SAMSN1</i>      | 1.23E-18 |
| <i>SRGN</i>        | 4.09E-23 |
| <i>RGS1</i>        | 2.05E-33 |
| <i>RGS2</i>        | 1.64E-27 |

|                  |          |
|------------------|----------|
| <i>CREM</i>      | 3.44E-34 |
| <i>LY86-AS1</i>  | 2.01E-06 |
| <i>CNOT6L</i>    | 1.14E-08 |
| <i>TIPARP</i>    | 5.80E-05 |
| <i>TNFAIP3</i>   | 2.34E-06 |
| <i>NR4A2</i>     | 4.80E-12 |
| <i>KLF6</i>      | 6.39E-07 |
| <i>ZFP36L2</i>   | 1.04E-08 |
| <i>CXCR4</i>     | 1.14E-12 |
| <i>RASGEF1B</i>  | 7.27E-22 |
| <i>PTGER4</i>    | 1.41E-16 |
| <i>EZR</i>       | 4.67E-07 |
| <i>FOSL2</i>     | 3.91E-07 |
| <i>ZNF331</i>    | 2.62E-08 |
| <i>NR4A3</i>     | 5.35E-11 |
| <i>REL</i>       | 1.29E-09 |
| <i>MCL1</i>      | 2.11E-06 |
| <i>PDE4D</i>     | 4.07E-08 |
| <i>PER1</i>      | 6.32E-09 |
| <i>ANXA1</i>     | 7.03E-30 |
| <i>ANKRD28</i>   | 2.10E-13 |
| <i>LINC01871</i> | 3.93E-13 |
| <i>SYTL3</i>     | 2.36E-07 |
| <i>AUTS2</i>     | 7.97E-15 |
| <i>ASIC4</i>     | 0.000406 |
| <i>RGPD5</i>     | 6.20E-06 |
| <i>RANBP2</i>    | 2.45E-10 |
| <i>ELF1</i>      | 3.17E-12 |
| <i>PRMT9</i>     | 8.92E-07 |
| <i>TSC22D2</i>   | 8.74E-06 |
| <i>PDCD4</i>     | 1.76E-06 |
| <i>SARAF</i>     | 2.14E-10 |
| <i>PABPC1</i>    | 2.97E-08 |
| <i>EIF5</i>      | 1.35E-08 |
| <i>PPP2R5C</i>   | 8.81E-08 |
| <i>PRRC2C</i>    | 4.80E-08 |
| <i>CLK1</i>      | 1.12E-06 |
| <i>ADGRE5</i>    | 8.06E-08 |
| <i>ELL2</i>      | 7.70E-07 |
| <i>BIRC3</i>     | 2.94E-07 |
| <i>GTF2B</i>     | 9.95E-38 |



|                  |          |
|------------------|----------|
| <i>KDM6B</i>     | 1.81E-08 |
| <i>VPS37B</i>    | 0.00159  |
| <i>CCT2</i>      | 3.95E-05 |
| <i>IRF1</i>      | 4.95E-06 |
| <i>PPP1R16B</i>  | 0.000781 |
| <i>RSL24D1</i>   | 0.0052   |
| <i>GNL3</i>      | 0.00353  |
| <i>HSPB1</i>     | 6.28E-08 |
| <i>FKBP4</i>     | 1.49E-07 |
| <i>BAG3</i>      | 4.65E-19 |
| <i>HSPA6</i>     | 1.36E-07 |
| <i>DNAJA4</i>    | 2.67E-12 |
| <i>ZFAND2A</i>   | 4.28E-15 |
| <i>SERPINH1</i>  | 1.47E-07 |
| <i>CACYBP</i>    | 6.39E-14 |
| <i>DNAJB4</i>    | 1.22E-06 |
| <i>PPP1R15A</i>  | 3.68E-07 |
| <i>DUSP1</i>     | 9.14E-10 |
| <i>HSP90AA6P</i> | 5.02E-10 |
| <i>HSP90AA2P</i> | 4.73E-10 |
| <i>HSP90AA1</i>  | 1.46E-12 |
| <i>HSPA1B</i>    | 8.05E-17 |
| <i>HSPA1A</i>    | 2.59E-22 |
| <i>HSPH1</i>     | 8.17E-19 |
| <i>DNAJB1</i>    | 6.42E-15 |
| <i>HSP90AB1</i>  | 1.37E-13 |
| <i>HSPD1</i>     | 3.00E-19 |
| <i>HSPE1</i>     | 3.69E-23 |
| <i>AHSA1</i>     | 6.53E-08 |
| <i>CHORDC1</i>   | 3.77E-11 |
| <i>DNAJB6</i>    | 1.22E-12 |
| <i>TCP1</i>      | 2.63E-15 |
| <i>HSPA4</i>     | 5.08E-08 |
| <i>NABP1</i>     | 2.20E-09 |
| <i>TRA2B</i>     | 2.41E-06 |
| <i>GPBP1</i>     | 1.32E-14 |
| <i>STIP1</i>     | 1.81E-07 |
| <i>BCAS2</i>     | 0.000218 |
| <i>NKRF</i>      | 0.005    |
| <i>PTGES3</i>    | 8.29E-09 |
| <i>MAP7D3</i>    | 0.00203  |

|                      |          |
|----------------------|----------|
| <i>CDKN1A</i>        | 1.43E-11 |
| <i>DUSP5</i>         | 3.36E-12 |
| <i>CSRNP1</i>        | 0.000183 |
| <i>RBM8A</i>         | 7.93E-07 |
| <i>CKS2</i>          | 2.10E-12 |
| <i>EGR1</i>          | 1.17E-06 |
| <i>RP11-1100L3.8</i> | 3.73E-10 |
| <i>NR4A1</i>         | 7.72E-12 |
| <i>TAGAP</i>         | 6.43E-07 |
| <i>CD69</i>          | 6.99E-09 |
| <i>DNAJA1</i>        | 1.51E-09 |
| <i>HSPA8</i>         | 7.96E-10 |
| <i>JUNB</i>          | 3.65E-06 |
| <i>JUN</i>           | 6.22E-13 |
| <i>DUSP2</i>         | 2.81E-12 |
| <i>FOS</i>           | 5.08E-07 |
| <i>FOSB</i>          | 5.00E-07 |
| <i>BTG2</i>          | 4.38E-06 |
| <i>YPEL5</i>         | 1.96E-06 |
| <i>ZFP36L1</i>       | 1.61E-06 |
| <i>CH507-42P11.8</i> | 3.96E-07 |
| <i>CDK2AP2</i>       | 0.000436 |
| <i>MYLIP</i>         | 0.00012  |
| <i>CD83</i>          | 6.50E-05 |
| <i>NFKBIA</i>        | 4.10E-07 |
| <i>DDIT4</i>         | 3.15E-10 |
| <i>IER5</i>          | 0.000644 |
| <i>ZC3H12A</i>       | 0.000265 |
| <i>TUBB4B</i>        | 6.54E-13 |
| <i>EIF4A2</i>        | 2.95E-07 |
| <i>PMAIP1</i>        | 2.52E-09 |
| <i>ROMO1</i>         | 0.0118   |
| <i>PPP1R15B</i>      | 5.78E-05 |
| <i>ABI3</i>          | 0.00449  |
| <i>SLC20A1</i>       | 0.00311  |
| <i>EPG5</i>          | 2.00E-05 |
| <i>ZNF131</i>        | 0.0213   |
| <i>RSRC2</i>         | 2.45E-10 |
| <i>SMARCA2</i>       | 5.19E-07 |
| <i>NOP58</i>         | 8.88E-13 |
| <i>UTY</i>           | 0.000332 |

|                     |          |
|---------------------|----------|
| <i>TTY15</i>        | 0.00989  |
| <i>DDX3Y</i>        | 0.000654 |
| <i>RPS4Y1</i>       | 0.000511 |
| <i>RP11-631M6.2</i> | 9.49E-06 |
| <i>SF3A3</i>        | 0.00717  |
| <i>RSBN1</i>        | 0.00823  |
| <i>ACTR2</i>        | 8.87E-06 |
| <i>NUFIP2</i>       | 0.0132   |
| <i>ZYX</i>          | 0.00108  |
| <i>DEK</i>          | 0.00198  |
| <i>SUCO</i>         | 0.0102   |
| <i>RASA2</i>        | 0.00872  |
| <i>ARAP2</i>        | 0.0277   |
| <i>SH2D1A</i>       | 0.00048  |
| <i>PSMC5</i>        | 0.00142  |
| <i>ETFB</i>         | 0.049    |
| <i>IFI6</i>         | 0.0172   |
| <i>GPR89A</i>       | 0.00168  |
| <i>PHTF1</i>        | 0.00244  |
| <i>EAF1</i>         | 0.0167   |
| <i>SERPINB9</i>     | 3.78E-11 |
| <i>SIMC1</i>        | 0.0188   |
| <i>MRPS11</i>       | 0.0311   |
| <i>WDR43</i>        | 0.017    |
| <i>YY1</i>          | 0.00129  |
| <i>ARL6IP1</i>      | 9.24E-06 |
| <i>RAB21</i>        | 0.0126   |
| <i>VPS26A</i>       | 0.0128   |
| <i>ZWILCH</i>       | 0.0227   |
| <i>BNIP3L</i>       | 0.0192   |
| <i>PPP2CA</i>       | 0.00538  |
| <i>TMX1</i>         | 0.00181  |
| <i>RNF19A</i>       | 4.57E-30 |
| <i>SPAG1</i>        | 0.0137   |
| <i>SAT1</i>         | 1.49E-12 |
| <i>TSPYL2</i>       | 4.86E-08 |
| <i>CCDC47</i>       | 0.0146   |
| <i>FKBP5</i>        | 1.23E-13 |
| <i>IL7R</i>         | 8.29E-15 |
| <i>SMAP2</i>        | 0.00231  |
| <i>TXNIP</i>        | 2.07E-10 |

|                  |          |
|------------------|----------|
| <i>PIK3IP1</i>   | 0.00012  |
| <i>SLA</i>       | 8.06E-08 |
| <i>RBM12</i>     | 0.00753  |
| <i>PPP2R3C</i>   | 0.0291   |
| <i>SREBF1</i>    | 0.0205   |
| <i>TMED10</i>    | 0.00537  |
| <i>BIRC2</i>     | 0.00126  |
| <i>LINC01578</i> | 2.19E-06 |
| <i>IL18R1</i>    | 0.00804  |
| <i>DEF6</i>      | 0.0251   |
| <i>ZMAT2</i>     | 4.90E-21 |
| <i>CWC22</i>     | 0.000618 |
| <i>SNHG25</i>    | 0.0181   |
| <i>PSMC2</i>     | 1.04E-09 |
| <i>IQCBI</i>     | 0.0227   |
| <i>ZBTB1</i>     | 8.30E-07 |
| <i>XRN2</i>      | 0.0366   |
| <i>BTG3</i>      | 2.11E-06 |
| <i>JTB</i>       | 0.0143   |
| <i>Clorf52</i>   | 3.52E-18 |
| <i>PIGF</i>      | 0.0106   |
| <i>TFG</i>       | 0.0123   |
| <i>GGCT</i>      | 2.88E-09 |
| <i>MANF</i>      | 5.38E-06 |
| <i>ATP6V0B</i>   | 0.000505 |
| <i>MZT1</i>      | 0.00427  |
| <i>HINT2</i>     | 1.14E-09 |
| <i>KIF5B</i>     | 0.0101   |
| <i>MKL1</i>      | 2.65E-07 |
| <i>DYNLT1</i>    | 3.05E-05 |
| <i>YTHDF2</i>    | 2.19E-09 |
| <i>LAMA4</i>     | 0.00982  |
| <i>BLVRA</i>     | 0.0233   |
| <i>USP7</i>      | 2.31E-05 |
| <i>LYST</i>      | 0.0432   |
| <i>TSEN54</i>    | 0.000193 |
| <i>WDR19</i>     | 0.0163   |
| <i>SND1</i>      | 0.00418  |
| <i>GCC2</i>      | 0.000524 |
| <i>ICAM2</i>     | 0.00107  |
| <i>SRSF9</i>     | 0.00352  |

|                      |          |
|----------------------|----------|
| <i>GPSM3</i>         | 0.0277   |
| <i>RP11-158G18.1</i> | 3.21E-05 |
| <i>ARHGAP30</i>      | 0.00641  |
| <i>TSNAX</i>         | 0.0083   |
| <i>SLC30A1</i>       | 8.41E-07 |
| <i>FAM126B</i>       | 0.000293 |
| <i>CACNA1D</i>       | 0.00114  |
| <i>ERO1A</i>         | 9.94E-06 |
| <i>SMC3</i>          | 0.0223   |
| <i>ZNF148</i>        | 0.00207  |
| <i>RTCA</i>          | 0.0315   |
| <i>ACTR1A</i>        | 0.0122   |
| <i>CIAO1</i>         | 3.72E-26 |
| <i>SRPRA</i>         | 0.00694  |
| <i>DCTN1</i>         | 0.00739  |
| <i>SPTBN1</i>        | 0.000649 |
| <i>IKBKB</i>         | 0.00165  |
| <i>CCT7</i>          | 0.0303   |
| <i>TROVE2</i>        | 0.00077  |
| <i>NRDE2</i>         | 0.0255   |
| <i>GPS2</i>          | 0.0308   |
| <i>COPS5</i>         | 0.0359   |
| <i>ERVK3-1</i>       | 0.0137   |
| <i>CASP2</i>         | 0.0107   |
| <i>SNRNP40</i>       | 0.0416   |
| <i>DZIP3</i>         | 0.000287 |
| <i>AP4B1</i>         | 0.0234   |
| <i>ILF2</i>          | 0.000226 |
| <i>PRDX3</i>         | 0.00748  |
| <i>AHCTF1</i>        | 0.0379   |
| <i>TERF2IP</i>       | 0.00435  |
| <i>AC007403.3</i>    | 0.0323   |
| <i>SIN3A</i>         | 0.047    |
| <i>SEC14L1</i>       | 0.049    |
| <i>RP11-297D21.4</i> | 0.0012   |
| <i>LAP3</i>          | 0.0105   |
| <i>BZW1</i>          | 0.0247   |
| <i>CCDC93</i>        | 2.59E-10 |
| <i>JAK1</i>          | 0.00032  |
| <i>TOP1</i>          | 0.000336 |
| <i>WWC3</i>          | 0.0248   |

|                     |          |
|---------------------|----------|
| <i>ATP6V1A</i>      | 0.00445  |
| <i>UBASH3B</i>      | 0.0391   |
| <i>NCBP2</i>        | 0.0211   |
| <i>CPNE3</i>        | 0.0294   |
| <i>SLC35B1</i>      | 0.0496   |
| <i>KIF13B</i>       | 9.44E-07 |
| <i>TMEM230</i>      | 0.0234   |
| <i>AH11</i>         | 1.32E-09 |
| <i>BRX1</i>         | 0.0248   |
| <i>HAX1</i>         | 0.00034  |
| <i>PPP2R5E</i>      | 0.0103   |
| <i>SQSTM1</i>       | 4.59E-11 |
| <i>P2RY10</i>       | 5.44E-06 |
| <i>SLC35A2</i>      | 7.12E-12 |
| <i>EIF3J</i>        | 0.000509 |
| <i>VDAC1</i>        | 0.00425  |
| <i>SLC25A19</i>     | 1.01E-27 |
| <i>SLX4IP</i>       | 0.0244   |
| <i>ATP5G3</i>       | 0.00101  |
| <i>PCBP1</i>        | 0.00177  |
| <i>RBBP6</i>        | 0.0287   |
| <i>PRKD3</i>        | 0.0367   |
| <i>EED</i>          | 0.00268  |
| <i>OGFOD1</i>       | 0.00203  |
| <i>VDAC3</i>        | 6.34E-05 |
| <i>IL10RA</i>       | 5.63E-05 |
| <i>GPR65</i>        | 2.27E-06 |
| <i>RP11-632C17</i>  | 0.0124   |
| <i>RP11-641D5.1</i> | 0.0299   |
| <i>RNU2-2P</i>      | 0.0409   |
| <i>RNU4ATAC</i>     | 6.26E-06 |
| <i>UHMK1</i>        | 0.00923  |
| <i>RP1-56K13.3</i>  | 0.00305  |
| <i>NEDD9</i>        | 3.87E-07 |
| <i>MKNK2</i>        | 4.38E-09 |
| <i>CCNK</i>         | 0.0185   |
| <i>TSTA3</i>        | 0.0208   |
| <i>NT5DC2</i>       | 0.00708  |
| <i>EPAS1</i>        | 0.00069  |
| <i>CAB39</i>        | 0.00178  |
| <i>LIMD2</i>        | 0.0443   |

|                       |          |
|-----------------------|----------|
| <i>NBDY</i>           | 0.00299  |
| <i>FAM32A</i>         | 2.69E-05 |
| <i>POLE4</i>          | 0.0147   |
| <i>NDUFS4</i>         | 0.00519  |
| <i>RLF</i>            | 0.0308   |
| <i>SP3</i>            | 1.83E-29 |
| <i>RAD51D</i>         | 0.0113   |
| <i>CALU</i>           | 0.00013  |
| <i>NFU1</i>           | 0.0252   |
| <i>DDOST</i>          | 0.0407   |
| <i>ABCB10</i>         | 3.48E-07 |
| <i>IL10RB</i>         | 0.000583 |
| <i>NFAT5</i>          | 0.000471 |
| <i>TINF2</i>          | 0.00479  |
| <i>HIBCH</i>          | 0.0221   |
| <i>CAMK4</i>          | 4.29E-05 |
| <i>FLI1</i>           | 0.03     |
| <i>LNPK</i>           | 0.0226   |
| <i>PTBP3</i>          | 7.47E-05 |
| <i>ARHGEF3</i>        | 0.0208   |
| <i>SOS2</i>           | 0.00993  |
| <i>PIGV</i>           | 0.0221   |
| <i>IRAK4</i>          | 0.0449   |
| <i>TVP23C-CDRT4</i>   | 0.00095  |
| <i>NLRX1</i>          | 0.0276   |
| <i>RC3H2</i>          | 0.000848 |
| <i>EIF2A</i>          | 0.0446   |
| <i>SERP1</i>          | 0.022    |
| <i>KYAT3</i>          | 2.82E-08 |
| <i>CD58</i>           | 0.00677  |
| <i>KIAA1109</i>       | 3.35E-06 |
| <i>SIPA1</i>          | 0.0425   |
| <i>RPS7P10</i>        | 2.62E-05 |
| <i>ITPR2</i>          | 0.00447  |
| <i>SDF2</i>           | 0.0196   |
| <i>RP11-1024P17.1</i> | 0.0197   |
| <i>PSMA1</i>          | 0.00156  |
| <i>DHRS3</i>          | 1.80E-05 |
| <i>PTP4A1</i>         | 0.000371 |
| <i>RP11-545A16.4</i>  | 1.12E-05 |
| <i>SEC62-AS1</i>      | 0.0208   |

|                       |          |
|-----------------------|----------|
| <i>RORA-AS1</i>       | 0.00181  |
| <i>CTC-505O3.3</i>    | 3.46E-09 |
| <i>RORA</i>           | 9.29E-23 |
| <i>CYCSP38</i>        | 8.88E-06 |
| <i>TRIB2</i>          | 1.24E-09 |
| <i>CXCR6</i>          | 2.67E-06 |
| <i>PRDM1</i>          | 6.24E-18 |
| <i>MGAT4A</i>         | 1.43E-09 |
| <i>TBC1D31</i>        | 0.02     |
| <i>TRNT1</i>          | 0.0102   |
| <i>RNF4</i>           | 9.66E-05 |
| <i>SLC30A7</i>        | 0.0147   |
| <i>ANAPC15</i>        | 0.016    |
| <i>HN1</i>            | 0.0106   |
| <i>RBM4</i>           | 0.00133  |
| <i>MYEF2</i>          | 0.00866  |
| <i>CHKB</i>           | 0.0301   |
| <i>TUBB</i>           | 5.94E-06 |
| <i>SETD5</i>          | 3.70E-05 |
| <i>ERN1</i>           | 2.42E-05 |
| <i>CACNB3</i>         | 0.00273  |
| <i>ABCC1</i>          | 0.00159  |
| <i>MAP3K10</i>        | 3.15E-06 |
| <i>DLEU1</i>          | 0.00335  |
| <i>RP11-5O24.1</i>    | 0.0476   |
| <i>B3GALNT1P1</i>     | 0.0156   |
| <i>HAVCR2</i>         | 0.00274  |
| <i>BAZ1B</i>          | 0.00282  |
| <i>ZCCHC6</i>         | 2.24E-05 |
| <i>USP42</i>          | 8.93E-06 |
| <i>COL4A3BP</i>       | 0.0163   |
| <i>NUPL2</i>          | 7.94E-05 |
| <i>TSPAN6</i>         | 0.00354  |
| <i>TULP4</i>          | 1.98E-06 |
| <i>RP3-449O17.1</i>   | 0.00889  |
| <i>KAT2B</i>          | 5.09E-07 |
| <i>RP11-1152H15.1</i> | 0.0403   |
| <i>NUP62</i>          | 0.0107   |
| <i>RP11-76I7.1</i>    | 0.0245   |
| <i>TPMT</i>           | 0.0301   |
| <i>SLFN5</i>          | 1.61E-06 |



|                      |          |
|----------------------|----------|
| <i>STX17</i>         | 0.0152   |
| <i>RP5-826L7.1</i>   | 0.0281   |
| <i>WASHC3</i>        | 0.00288  |
| <i>GOLGA2P5</i>      | 0.0117   |
| <i>NT5C2</i>         | 0.0194   |
| <i>NUDT15</i>        | 0.00657  |
| <i>FAM45A</i>        | 0.045    |
| <i>GSDMD</i>         | 0.0494   |
| <i>LCMT1-AS1</i>     | 0.0414   |
| <i>IL6ST</i>         | 0.00332  |
| <i>TBC1D8</i>        | 0.0186   |
| <i>AC005954.4</i>    | 0.0315   |
| <i>GALC</i>          | 8.12E-12 |
| <i>PRKAB1</i>        | 0.0159   |
| <i>RP11-434H14.1</i> | 0.0371   |
| <i>NAA16</i>         | 0.0233   |
| <i>KAT6B</i>         | 0.00814  |
| <i>FRYL</i>          | 0.0245   |
| <i>PDE3B</i>         | 0.0274   |
| <i>FBXW11</i>        | 0.0249   |
| <i>TMA16</i>         | 0.00579  |
| <i>AKR1A1</i>        | 0.000173 |
| <i>RP11-113K21.6</i> | 0.0477   |
| <i>PTRH1</i>         | 0.0312   |
| <i>EIF4G3</i>        | 0.000141 |
| <i>PLD1</i>          | 0.0175   |
| <i>PHF20</i>         | 0.00175  |
| <i>LIX1L</i>         | 0.0359   |
| <i>EXOSC1</i>        | 0.0237   |
| <i>PINLYP</i>        | 0.00378  |
| <i>ZMYM6</i>         | 0.0109   |
| <i>UQCRC2</i>        | 4.63E-05 |
| <i>LUC7L</i>         | 0.00172  |
| <i>TTPAL</i>         | 0.0453   |
| <i>RP11-703G6.1</i>  | 4.97E-06 |
| <i>RP11-624A21.1</i> | 3.20E-06 |
| <i>GRIPAP1</i>       | 0.000293 |
| <i>TBCK</i>          | 0.0109   |
| <i>MORC3</i>         | 0.00639  |
| <i>AP000692.9</i>    | 0.0464   |
| <i>GALNT10</i>       | 0.00501  |

|                       |          |
|-----------------------|----------|
| <i>RP11-717A5.2</i>   | 0.000567 |
| <i>LINC01697</i>      | 0.0436   |
| <i>PCBD2</i>          | 0.0441   |
| <i>TRIP4</i>          | 0.00551  |
| <i>CNOT4</i>          | 0.00673  |
| <i>LINC00891</i>      | 0.0032   |
| <i>ELK3</i>           | 4.03E-05 |
| <i>RP11-304L19.11</i> | 0.0275   |
| <i>ATG10</i>          | 0.00275  |
| <i>RN7SL624P</i>      | 0.0315   |
| <i>REEP2</i>          | 0.0189   |
| <i>KLF12</i>          | 0.00668  |
| <i>UBE2F</i>          | 0.0116   |
| <i>RP11-715J22.6</i>  | 0.0224   |
| <i>GEMIN7</i>         | 0.00372  |
| <i>ZMYM2</i>          | 3.25E-07 |
| <i>EDEM3</i>          | 0.00339  |
| <i>RP11-264L1.2</i>   | 0.0282   |
| <i>RP11-806L2.2</i>   | 0.000581 |
| <i>CRBN</i>           | 0.000168 |
| <i>KIAA1524</i>       | 0.021    |
| <i>MCM10</i>          | 0.0335   |
| <i>MPV17</i>          | 0.0274   |
| <i>TMX3</i>           | 0.0028   |
| <i>TRIM13</i>         | 0.0339   |
| <i>SOS1</i>           | 7.53E-05 |
| <i>SIAH2</i>          | 0.00316  |
| <i>MAP3K4</i>         | 7.46E-05 |
| <i>GPR171</i>         | 1.50E-11 |
| <i>TRGV4</i>          | 8.38E-06 |
| <i>TRGV3</i>          | 9.24E-07 |
| <i>TRGJP2</i>         | 5.60E-07 |
| <i>TRGC1</i>          | 8.67E-15 |
| <i>TRGC2</i>          | 1.45E-24 |
| <i>TRGJ1</i>          | 9.95E-38 |
| <i>TRGJ2</i>          | 9.95E-38 |
| <i>TRGV10</i>         | 4.12E-19 |
| <i>TRGV9</i>          | 5.60E-09 |
| <i>CCL3</i>           | 5.40E-07 |
| <i>CCL3L3</i>         | 3.80E-08 |
| <i>RP11-230F18.5</i>  | 8.91E-08 |

|                      |          |
|----------------------|----------|
| <i>CTSW</i>          | 4.50E-08 |
| <i>KLRD1</i>         | 5.76E-09 |
| <i>PRF1</i>          | 5.47E-09 |
| <i>GZMA</i>          | 7.01E-16 |
| <i>GZMH</i>          | 2.01E-16 |
| <i>GZMB</i>          | 1.02E-26 |
| <i>ITGA1</i>         | 1.74E-14 |
| <i>XCL2</i>          | 4.70E-17 |
| <i>XCL1</i>          | 4.81E-29 |
| <i>CCL4L2</i>        | 1.19E-18 |
| <i>CCL4</i>          | 1.59E-34 |
| <i>IFNG</i>          | 2.12E-21 |
| <i>ZNF683</i>        | 8.59E-22 |
| <i>NKG7</i>          | 3.54E-22 |
| <i>KLRK1</i>         | 8.62E-46 |
| <i>CCL5</i>          | 5.17E-49 |
| <i>CD8A</i>          | 2.23E-52 |
| <i>CD8B</i>          | 1.84E-28 |
| <i>AOAH</i>          | 1.01E-13 |
| <i>KLRC4</i>         | 5.23E-13 |
| <i>KLRC4-KLRK1</i>   | 4.09E-13 |
| <i>KLRC1</i>         | 2.65E-14 |
| <i>KLRC3</i>         | 8.48E-17 |
| <i>KLRC2</i>         | 6.88E-17 |
| <i>HOPX</i>          | 1.39E-08 |
| <i>RP11-291B21.2</i> | 5.19E-23 |
| <i>SLAMF7</i>        | 4.59E-08 |
| <i>CD244</i>         | 1.06E-17 |
| <i>CST7</i>          | 2.23E-08 |
| <i>CRTAM</i>         | 4.59E-16 |
| <i>FASLG</i>         | 0.000502 |
| <i>CH17-189H20.1</i> | 5.42E-06 |
| <i>PARP8</i>         | 1.73E-10 |
| <i>LINC01138</i>     | 1.94E-09 |
| <i>LINC00869</i>     | 1.92E-05 |
| <i>TBX21</i>         | 1.62E-13 |
| <i>TBCD</i>          | 1.25E-07 |
| <i>CTB-178M22.1</i>  | 1.24E-09 |
| <i>CD55</i>          | 5.77E-17 |
| <i>RP11-77A13.1</i>  | 1.68E-14 |
| <i>TOB1</i>          | 7.78E-06 |

|                       |          |
|-----------------------|----------|
| <i>HLA-DRB5</i>       | 1.11E-06 |
| <i>HLA-DRB1</i>       | 1.07E-06 |
| <i>HLA-DRB6</i>       | 7.38E-09 |
| <i>HLA-DQB1</i>       | 0.000284 |
| <i>HLA-DPB1</i>       | 0.00015  |
| <i>CD63</i>           | 0.0161   |
| <i>RP11-277P12.20</i> | 5.33E-09 |
| <i>STYK1</i>          | 6.31E-11 |
| <i>RP11-73M18.8</i>   | 3.82E-05 |
| <i>USP11</i>          | 0.00937  |

**Table S7. Genes differentially expressed between T7 and T8**

| <b>Gene Symbol</b> | <b>Transcript ID</b> | <b>FDR-adjusted p values</b> | <b>Fold Change (absolute)</b> | <b>Regulation T8 vs. T7</b> |
|--------------------|----------------------|------------------------------|-------------------------------|-----------------------------|
| <i>CD40LG</i>      | NM_000074            | 7.50E-05                     | 5.46E+02                      | down                        |
| <i>TRERF1</i>      | NM_033502            | 7.85E-04                     | 1.81E+01                      | down                        |
| <i>FOXP3</i>       | NM_001114377         | 1.02E-03                     | 3.74E+13                      | down                        |
| <i>PRR5L</i>       | NM_001160169         | 1.03E-03                     | 2.87E+01                      | down                        |
| <i>ZNF92</i>       | NM_001287534         | 1.62E-03                     | 9.85E+01                      | down                        |
| <i>CD6</i>         | NM_006725            | 2.18E-03                     | 2.83E+01                      | down                        |
| <i>THADA</i>       | NM_022065            | 2.89E-03                     | 2.47E+02                      | down                        |
| <i>SLAMF1</i>      | NM_003037            | 4.50E-03                     | 3.06E+18                      | down                        |
| <i>KIF20B</i>      | NM_001284259         | 7.69E-03                     | 2.77E+01                      | down                        |
| <i>MBNL1</i>       | NM_207295            | 8.37E-03                     | 8.27E+01                      | down                        |
| <i>LUC7L</i>       | NM_201412            | 1.04E-02                     | 2.59E+02                      | down                        |
| <i>INPP4B</i>      | NM_001101669         | 1.09E-02                     | 2.42E+10                      | down                        |
| <i>TGFBR2</i>      | NM_003242            | 1.42E-02                     | 2.71E+06                      | down                        |
| <i>PHF6</i>        | NM_032335            | 1.42E-02                     | 5.34E+03                      | down                        |
| <i>TNFRSF9</i>     | NM_001561            | 1.42E-02                     | 1.33E+13                      | down                        |
| <i>CFL2</i>        | NM_001243645         | 1.65E-02                     | 5.22E+02                      | down                        |
| <i>SIRPB1</i>      | NM_001083910         | 1.93E-02                     | 5.56E+03                      | down                        |
| <i>ACAD11</i>      | NM_032169            | 2.39E-02                     | 5.91E+02                      | down                        |
| <i>IL1R1</i>       | NM_000877            | 2.47E-02                     | 6.54E+15                      | down                        |
| <i>PIK3R1</i>      | NM_181523            | 2.53E-02                     | 2.30E+03                      | down                        |
| <i>KRCC1</i>       | NM_001304526         | 2.59E-02                     | 4.51E+01                      | down                        |
| <i>IL1R2</i>       | NR_048564            | 2.96E-02                     | 8.58E+08                      | down                        |
| <i>CST7</i>        | NM_003650            | 3.13E-02                     | 2.53E+31                      | down                        |
| <i>RSRC2</i>       | NR_036434            | 3.17E-02                     | 4.47E+03                      | down                        |
| <i>STAT4</i>       | NM_003151            | 3.48E-02                     | 8.46E+04                      | down                        |
| <i>TINF2</i>       | NM_001099274         | 3.61E-02                     | 9.67E+01                      | down                        |
| <i>ALKBH5</i>      | NM_017758            | 3.70E-02                     | 1.79E+05                      | down                        |
| <i>PDE4D</i>       | NM_001197223         | 3.77E-02                     | 3.10E+01                      | down                        |
| <i>DDX50</i>       | NM_024045            | 3.94E-02                     | 2.40E+14                      | down                        |
| <i>LTB</i>         | NM_002341            | 4.16E-02                     | 8.46E+07                      | down                        |
| <i>ARHGEF3</i>     | NM_001289698         | 4.35E-02                     | 9.24E+02                      | down                        |
| <i>COX10-AS1</i>   | NR_049718            | 4.87E-02                     | 1.59E+09                      | down                        |
| <i>EGLN3</i>       | NM_001308103         | 0.00E+00                     | 1.54E+24                      | up                          |
| <i>LIF</i>         | NM_001257135         | 0.00E+00                     | 9.09E+06                      | up                          |
| <i>PLN</i>         | NM_002667            | 2.17E-13                     | 3.45E+37                      | up                          |
| <i>PPARG</i>       | NM_138711            | 1.56E-12                     | 9.81E+19                      | up                          |
| <i>PTGDR2</i>      | NM_004778            | 1.91E-11                     | 6.96E+15                      | up                          |
| <i>LMO4</i>        | NM_006769            | 2.60E-11                     | 7.62E+06                      | up                          |

|                     |              |          |          |    |
|---------------------|--------------|----------|----------|----|
| <i>TESPA1</i>       | NM_001136030 | 7.50E-11 | 1.34E+16 | up |
| <i>PLIN2</i>        | NR_038064    | 2.58E-10 | 3.44E+18 | up |
| <i>NR3C1</i>        | NM_001024094 | 4.27E-10 | 5.68E+01 | up |
| <i>GALC</i>         | NM_000153    | 6.55E-10 | 5.09E+01 | up |
| <i>CHDH</i>         | NM_018397    | 1.02E-09 | 2.91E+13 | up |
| <i>PTPN13</i>       | NM_080684    | 1.41E-09 | 2.26E+03 | up |
| <i>GNAQ</i>         | NM_002072    | 3.97E-09 | 2.14E+09 | up |
| <i>CACNA1D</i>      | NM_001128839 | 4.23E-08 | 1.27E+03 | up |
| <i>ZEB2</i>         | NM_014795    | 7.83E-08 | 6.65E+01 | up |
| <i>AH11</i>         | NM_001134832 | 9.73E-08 | 1.18E+06 | up |
| <i>MAP3K8</i>       | NM_005204    | 1.45E-07 | 1.13E+07 | up |
| <i>ACSL4</i>        | NM_022977    | 2.23E-07 | 5.23E+01 | up |
| <i>ALOX5AP</i>      | NM_001204406 | 4.67E-07 | 1.85E+17 | up |
| <i>CASQ1</i>        | NM_001231    | 4.68E-07 | 9.89E+20 | up |
| <i>GLO1</i>         | NM_006708    | 8.79E-07 | 6.86E+20 | up |
| <i>TSEN54</i>       | NM_207346    | 1.18E-06 | 5.18E+10 | up |
| <i>BHLHE40-AS1</i>  | NR_125914    | 1.37E-06 | 1.78E+03 | up |
| <i>GATA3</i>        | NM_002051    | 1.41E-06 | 3.94E+23 | up |
| <i>GK</i>           | NM_001205019 | 1.42E-06 | 6.68E+02 | up |
| <i>PLCL2</i>        | NM_015184    | 2.43E-06 | 1.29E+05 | up |
| <i>FKBP5</i>        | NM_004117    | 3.43E-06 | 2.33E+05 | up |
| <i>ITPR1</i>        | NM_002222    | 8.77E-06 | 1.81E+03 | up |
| <i>BLM</i>          | NM_001287248 | 9.58E-06 | 1.73E+01 | up |
| <i>NFKBIZ</i>       | NM_031419    | 9.65E-06 | 1.80E+09 | up |
| <i>TNFSF11</i>      | NM_003701    | 1.04E-05 | 4.33E+05 | up |
| <i>ITK</i>          | NM_005546    | 1.15E-05 | 2.22E+20 | up |
| <i>LINC00892</i>    | NR_038461    | 1.18E-05 | 2.38E+22 | up |
| <i>IL1RL1</i>       | NM_016232    | 1.40E-05 | 2.48E+22 | up |
| <i>TNFSF10</i>      | NR_033994    | 1.43E-05 | 4.88E+06 | up |
| <i>ALAS1</i>        | NM_199166    | 1.45E-05 | 8.57E+26 | up |
| <i>CD200R1</i>      | NM_170780    | 1.74E-05 | 1.70E+03 | up |
| <i>LOC101928791</i> | NR_110121    | 1.81E-05 | 1.68E+32 | up |
| <i>ILA</i>          | NM_000589    | 2.42E-05 | 6.49E+07 | up |
| <i>ST6GAL1</i>      | NM_173217    | 2.58E-05 | 2.25E+06 | up |
| <i>TIMP1</i>        | NM_003254    | 2.96E-05 | 9.15E+36 | up |
| <i>MRPS6</i>        | NM_032476    | 3.20E-05 | 1.39E+25 | up |
| <i>HLF</i>          | NM_002126    | 3.35E-05 | 2.17E+05 | up |
| <i>C5orf22</i>      | NM_018356    | 3.74E-05 | 4.14E+11 | up |
| <i>PFDN1</i>        | NM_002622    | 4.22E-05 | 5.23E+09 | up |
| <i>SOS1</i>         | NM_005633    | 4.22E-05 | 4.16E+08 | up |
| <i>SDCBP</i>        | NM_001007067 | 4.30E-05 | 1.64E+10 | up |

|                   |              |          |          |    |
|-------------------|--------------|----------|----------|----|
| <i>BAG2</i>       | NM_004282    | 4.70E-05 | 3.42E+03 | up |
| <i>SLC27A2</i>    | NM_001159629 | 5.82E-05 | 8.33E+03 | up |
| <i>BHLHE40</i>    | NM_003670    | 7.17E-05 | 2.59E+14 | up |
| <i>HK2</i>        | NM_000189    | 9.01E-05 | 2.13E+03 | up |
| <i>YPEL2</i>      | NM_001005404 | 9.82E-05 | 1.72E+03 | up |
| <i>C1orf162</i>   | NM_001300835 | 1.04E-04 | 1.55E+03 | up |
| <i>DZIP3</i>      | NM_014648    | 1.33E-04 | 1.35E+16 | up |
| <i>SMARCA2</i>    | NM_001289399 | 1.43E-04 | 1.18E+12 | up |
| <i>TAB3</i>       | NM_152787    | 1.58E-04 | 2.27E+03 | up |
| <i>CYSLTR1</i>    | NM_006639    | 1.66E-04 | 6.38E+09 | up |
| <i>DENND1B</i>    | NM_001195215 | 1.66E-04 | 3.43E+01 | up |
| <i>IL10RA</i>     | NM_001558    | 1.66E-04 | 4.36E+09 | up |
| <i>RGS9</i>       | NM_001165933 | 1.67E-04 | 5.05E+05 | up |
| <i>TIMMDC1</i>    | NM_016589    | 1.94E-04 | 4.44E+20 | up |
| <i>ADAM19</i>     | NM_033274    | 2.09E-04 | 1.64E+33 | up |
| <i>TMED5</i>      | NM_001167830 | 2.14E-04 | 9.28E+02 | up |
| <i>ATP11B</i>     | NM_014616    | 2.64E-04 | 8.05E+03 | up |
| <i>DUSP4</i>      | NM_001394    | 2.66E-04 | 7.44E+08 | up |
| <i>SLC4A7</i>     | NM_001258380 | 2.66E-04 | 2.93E+04 | up |
| <i>GPR35</i>      | NM_005301    | 3.13E-04 | 3.99E+13 | up |
| <i>BCL2L11</i>    | NM_001204107 | 3.69E-04 | 9.66E+02 | up |
| <i>UBE2E1</i>     | NM_001202476 | 4.83E-04 | 8.97E+02 | up |
| <i>PTP4A2</i>     | NM_080391    | 4.89E-04 | 2.72E+13 | up |
| <i>CREM</i>       | NM_182717    | 5.08E-04 | 3.11E+34 | up |
| <i>GAB3</i>       | NR_104114    | 6.13E-04 | 2.63E+30 | up |
| <i>PSMD1</i>      | NM_002807    | 6.34E-04 | 8.99E+02 | up |
| <i>RBPJ</i>       | NM_203284    | 6.47E-04 | 5.28E+05 | up |
| <i>BCAR3</i>      | NM_001308251 | 6.81E-04 | 5.03E+07 | up |
| <i>ITGA4</i>      | NM_000885    | 7.24E-04 | 6.48E+07 | up |
| <i>IL4R</i>       | NM_001257997 | 7.71E-04 | 6.54E+01 | up |
| <i>SLC1A4</i>     | NM_001193493 | 7.75E-04 | 2.03E+03 | up |
| <i>PTGER4</i>     | NM_000958    | 8.21E-04 | 9.92E+06 | up |
| <i>RABGAP1L</i>   | NM_001243763 | 8.21E-04 | 3.98E+02 | up |
| <i>IL10RB-AS1</i> | NR_038974    | 8.34E-04 | 2.96E+09 | up |
| <i>FUT8</i>       | NR_038170    | 8.56E-04 | 1.51E+05 | up |
| <i>PDCD4</i>      | NM_014456    | 8.67E-04 | 1.61E+06 | up |
| <i>RNU4ATAC</i>   | NR_023343    | 8.73E-04 | 2.16E+14 | up |
| <i>SCD</i>        | NM_005063    | 9.06E-04 | 2.88E+24 | up |
| <i>DSE</i>        | NM_001080976 | 9.06E-04 | 4.22E+03 | up |
| <i>SERP1</i>      | NM_014445    | 9.86E-04 | 1.43E+13 | up |
| <i>AHR</i>        | NM_001621    | 1.21E-03 | 3.22E+18 | up |

|                  |              |          |          |    |
|------------------|--------------|----------|----------|----|
| <i>NDFIP2</i>    | NM_019080    | 1.21E-03 | 2.90E+03 | up |
| <i>EIF2AK1</i>   | NM_014413    | 1.26E-03 | 2.04E+06 | up |
| <i>CRBN</i>      | NM_016302    | 1.28E-03 | 2.38E+23 | up |
| <i>SOCS1</i>     | NM_003745    | 1.34E-03 | 5.82E+06 | up |
| <i>FBXL5</i>     | NM_012161    | 1.34E-03 | 6.48E+03 | up |
| <i>NFATC3</i>    | NM_173165    | 1.37E-03 | 8.13E+05 | up |
| <i>PPIB</i>      | NM_000942    | 1.42E-03 | 2.46E+36 | up |
| <i>KIF13B</i>    | NM_015254    | 1.43E-03 | 6.71E+02 | up |
| <i>C10orf128</i> | NM_001010863 | 1.46E-03 | 1.92E+06 | up |
| <i>CDC73</i>     | NM_024529    | 1.46E-03 | 7.68E+05 | up |
| <i>JUN</i>       | NM_002228    | 1.48E-03 | 2.50E+10 | up |
| <i>ZC2HC1A</i>   | NM_016010    | 1.50E-03 | 1.93E+02 | up |
| <i>RAD50</i>     | NM_005732    | 1.54E-03 | 2.56E+04 | up |
| <i>RHOQ</i>      | NM_012249    | 1.62E-03 | 1.69E+02 | up |
| <i>ATAD2</i>     | NM_014109    | 1.70E-03 | 2.33E+02 | up |
| <i>RAB33A</i>    | NM_004794    | 1.81E-03 | 2.29E+07 | up |
| <i>RAPGEF2</i>   | NM_014247    | 1.82E-03 | 4.10E+01 | up |
| <i>OGN</i>       | NM_014057    | 1.82E-03 | 3.39E+07 | up |
| <i>RNF19A</i>    | NM_183419    | 1.82E-03 | 3.28E+06 | up |
| <i>PTGS2</i>     | NM_000963    | 1.82E-03 | 1.46E+04 | up |
| <i>TIGIT</i>     | NM_173799    | 1.89E-03 | 9.69E+28 | up |
| <i>MRPS31</i>    | NM_005830    | 1.96E-03 | 1.12E+07 | up |
| <i>AZIN1</i>     | NM_001301668 | 1.96E-03 | 1.13E+02 | up |
| <i>SERINC5</i>   | NM_001174072 | 1.97E-03 | 7.20E+17 | up |
| <i>LACTB</i>     | NM_032857    | 1.98E-03 | 1.52E+02 | up |
| <i>POLK</i>      | NM_016218    | 2.18E-03 | 3.09E+07 | up |
| <i>TNFAIP8</i>   | NM_014350    | 2.19E-03 | 1.16E+14 | up |
| <i>MLEC</i>      | NM_001303627 | 2.19E-03 | 4.67E+01 | up |
| <i>TFG</i>       | NM_001195478 | 2.34E-03 | 3.21E+05 | up |
| <i>DOCK8</i>     | NM_203447    | 2.47E-03 | 5.33E+03 | up |
| <i>FAM193A</i>   | NR_046335    | 2.64E-03 | 6.83E+05 | up |
| <i>KLHL6</i>     | NM_130446    | 2.70E-03 | 3.03E+02 | up |
| <i>HADHA</i>     | NM_000182    | 2.78E-03 | 1.51E+10 | up |
| <i>SAMSN1</i>    | NM_022136    | 2.88E-03 | 9.94E+35 | up |
| <i>EVC2</i>      | NM_147127    | 2.97E-03 | 9.77E+01 | up |
| <i>SNX22</i>     | NM_024798    | 3.06E-03 | 1.74E+03 | up |
| <i>KDM1A</i>     | NM_015013    | 3.06E-03 | 4.43E+02 | up |
| <i>CCDC71L</i>   | NM_175884    | 3.28E-03 | 1.09E+03 | up |
| <i>IL9R</i>      | NM_002186    | 3.28E-03 | 6.78E+01 | up |
| <i>SOS2</i>      | NM_006939    | 3.40E-03 | 3.77E+03 | up |
| <i>SNHG8</i>     | NR_003584    | 3.42E-03 | 8.34E+14 | up |



|                |              |          |          |    |
|----------------|--------------|----------|----------|----|
| <i>CPEB4</i>   | NM_001308192 | 3.54E-03 | 3.33E+01 | up |
| <i>PXK</i>     | NM_001289101 | 3.60E-03 | 1.46E+10 | up |
| <i>ZFC3H1</i>  | NM_144982    | 3.62E-03 | 8.41E+04 | up |
| <i>RPL23P8</i> | NR_026673    | 3.76E-03 | 1.57E+07 | up |
| <i>SQSTM1</i>  | NM_003900    | 4.06E-03 | 3.85E+12 | up |
| <i>NAA60</i>   | NM_024845    | 4.30E-03 | 1.33E+02 | up |
| <i>RPL37</i>   | NM_000997    | 4.39E-03 | 1.03E+24 | up |
| <i>WDR7</i>    | NM_052834    | 4.46E-03 | 8.84E+04 | up |
| <i>MLH1</i>    | NM_000249    | 4.47E-03 | 4.51E+01 | up |
| <i>MRPS28</i>  | NM_014018    | 4.50E-03 | 4.16E+11 | up |
| <i>PHYH</i>    | NM_006214    | 4.63E-03 | 2.97E+14 | up |
| <i>SORD</i>    | NR_034039    | 4.90E-03 | 5.54E+02 | up |
| <i>ZCCHC10</i> | NM_001308129 | 5.16E-03 | 1.73E+08 | up |
| <i>CKAP5</i>   | NM_014756    | 5.33E-03 | 1.62E+04 | up |
| <i>LRMP</i>    | NM_001204127 | 5.44E-03 | 3.52E+02 | up |
| <i>SPTBN1</i>  | NM_003128    | 5.72E-03 | 6.75E+02 | up |
| <i>CYP4F22</i> | NM_173483    | 5.83E-03 | 1.72E+03 | up |
| <i>FAH</i>     | NM_000137    | 5.85E-03 | 7.60E+20 | up |
| <i>TRA2A</i>   | NM_001282757 | 5.86E-03 | 4.27E+16 | up |
| <i>PRKAB1</i>  | NM_006253    | 6.32E-03 | 7.64E+27 | up |
| <i>POLB</i>    | NM_002690    | 6.62E-03 | 6.44E+04 | up |
| <i>TERF2IP</i> | NM_018975    | 6.75E-03 | 9.22E+08 | up |
| <i>GMNN</i>    | NM_015895    | 6.80E-03 | 5.96E+15 | up |
| <i>CCDC86</i>  | NM_024098    | 6.80E-03 | 3.51E+02 | up |
| <i>RTN4</i>    | NM_207521    | 6.85E-03 | 2.48E+02 | up |
| <i>PDHB</i>    | NM_000925    | 6.88E-03 | 4.62E+10 | up |
| <i>OSTF1</i>   | NM_012383    | 6.98E-03 | 7.98E+17 | up |
| <i>UBE2D3</i>  | NM_181887    | 7.08E-03 | 2.17E+06 | up |
| <i>TRAM1</i>   | NM_014294    | 7.19E-03 | 3.53E+05 | up |
| <i>DGKE</i>    | NM_003647    | 7.40E-03 | 6.26E+10 | up |
| <i>ERN1</i>    | NM_001433    | 7.72E-03 | 1.60E+02 | up |
| <i>HENMT1</i>  | NM_001102592 | 7.86E-03 | 1.62E+10 | up |
| <i>CLDND1</i>  | NM_001040182 | 7.86E-03 | 3.97E+02 | up |
| <i>USP15</i>   | NM_001252078 | 8.16E-03 | 2.72E+02 | up |
| <i>ASNSD1</i>  | NM_019048    | 8.20E-03 | 5.79E+07 | up |
| <i>E2F3</i>    | NM_001243076 | 8.20E-03 | 1.25E+03 | up |
| <i>XPO1</i>    | NM_003400    | 8.94E-03 | 6.17E+15 | up |
| <i>NUB1</i>    | NM_001243351 | 8.94E-03 | 1.05E+03 | up |
| <i>NCOA1</i>   | NM_003743    | 8.94E-03 | 8.27E+01 | up |
| <i>ATP5F1</i>  | NM_001688    | 9.10E-03 | 8.50E+26 | up |
| <i>FXYD5</i>   | NM_001164605 | 9.14E-03 | 4.55E+03 | up |

|                |              |          |          |    |
|----------------|--------------|----------|----------|----|
| <i>GSTO1</i>   | NM_004832    | 9.15E-03 | 1.55E+27 | up |
| <i>CANX</i>    | NM_001024649 | 9.23E-03 | 2.05E+16 | up |
| <i>SLC5A3</i>  | NM_006933    | 9.88E-03 | 1.65E+04 | up |
| <i>DEK</i>     | NM_001134709 | 9.96E-03 | 3.99E+10 | up |
| <i>FOXP1</i>   | NM_001244812 | 1.03E-02 | 1.72E+01 | up |
| <i>MRPL32</i>  | NM_031903    | 1.06E-02 | 7.84E+21 | up |
| <i>CASP1</i>   | NM_001223    | 1.07E-02 | 1.07E+02 | up |
| <i>CLECL1</i>  | NM_172004    | 1.07E-02 | 1.65E+03 | up |
| <i>AKIRIN2</i> | NM_018064    | 1.09E-02 | 2.28E+15 | up |
| <i>POLE4</i>   | NM_019896    | 1.17E-02 | 8.78E+07 | up |
| <i>PLA2G16</i> | NM_001128203 | 1.21E-02 | 6.00E+01 | up |
| <i>FBXO34</i>  | NM_017943    | 1.21E-02 | 3.32E+01 | up |
| <i>TTC3</i>    | NM_001001894 | 1.23E-02 | 3.94E+03 | up |
| <i>LAGE3</i>   | NM_006014    | 1.23E-02 | 2.50E+01 | up |
| <i>NUDT4</i>   | NM_001301024 | 1.23E-02 | 3.73E+10 | up |
| <i>TARBP1</i>  | NM_005646    | 1.23E-02 | 1.10E+07 | up |
| <i>TAF1D</i>   | NM_024116    | 1.26E-02 | 1.97E+07 | up |
| <i>SLC38A1</i> | NM_001077484 | 1.26E-02 | 3.50E+01 | up |
| <i>ANKRD44</i> | NM_001195144 | 1.26E-02 | 5.87E+05 | up |
| <i>AOAH</i>    | NM_001637    | 1.27E-02 | 2.45E+03 | up |
| <i>DGKA</i>    | NM_201554    | 1.28E-02 | 9.23E+06 | up |
| <i>NAA35</i>   | NM_024635    | 1.30E-02 | 2.68E+01 | up |
| <i>TXNDC11</i> | NM_015914    | 1.36E-02 | 2.49E+09 | up |
| <i>GPR65</i>   | NM_003608    | 1.36E-02 | 3.02E+01 | up |
| <i>CSNK2B</i>  | NM_001282385 | 1.37E-02 | 5.25E+01 | up |
| <i>TMEM173</i> | NM_001301738 | 1.38E-02 | 1.84E+04 | up |
| <i>SLFN5</i>   | NM_144975    | 1.38E-02 | 1.05E+03 | up |
| <i>MRPL53</i>  | NM_053050    | 1.39E-02 | 9.65E+21 | up |
| <i>RIF1</i>    | NM_001177664 | 1.39E-02 | 6.55E+01 | up |
| <i>EIF3L</i>   | NM_001242923 | 1.42E-02 | 4.79E+08 | up |
| <i>XPNPEP1</i> | NM_020383    | 1.44E-02 | 2.50E+11 | up |
| <i>SAFB</i>    | NR_037699    | 1.44E-02 | 6.37E+04 | up |
| <i>MRFAP1</i>  | NM_033296    | 1.47E-02 | 2.44E+08 | up |
| <i>POLR2G</i>  | NM_002696    | 1.48E-02 | 5.49E+08 | up |
| <i>PIGP</i>    | NM_153682    | 1.49E-02 | 5.55E+10 | up |
| <i>TMEM14B</i> | NM_001127711 | 1.49E-02 | 5.44E+03 | up |
| <i>BIRC3</i>   | NM_182962    | 1.52E-02 | 1.12E+31 | up |
| <i>RTFDC1</i>  | NM_001283037 | 1.53E-02 | 6.70E+07 | up |
| <i>LIMA1</i>   | NM_001113547 | 1.53E-02 | 2.28E+27 | up |
| <i>RPS24</i>   | NM_033022    | 1.57E-02 | 2.49E+05 | up |
| <i>SPIRE1</i>  | NM_001128627 | 1.57E-02 | 1.21E+05 | up |

|                 |              |          |          |    |
|-----------------|--------------|----------|----------|----|
| <i>EDEM3</i>    | NM_025191    | 1.60E-02 | 3.14E+02 | up |
| <i>NR4A3</i>    | NM_006981    | 1.61E-02 | 1.24E+06 | up |
| <i>NACA</i>     | NR_045277    | 1.61E-02 | 1.60E+30 | up |
| <i>GDE1</i>     | NM_016641    | 1.61E-02 | 3.58E+18 | up |
| <i>SND1</i>     | NM_014390    | 1.61E-02 | 1.50E+02 | up |
| <i>CXorf65</i>  | NR_033212    | 1.62E-02 | 2.08E+01 | up |
| <i>UNG</i>      | NM_080911    | 1.63E-02 | 6.78E+23 | up |
| <i>CCDC28B</i>  | NM_024296    | 1.65E-02 | 1.17E+02 | up |
| <i>BTG3</i>     | NM_006806    | 1.65E-02 | 4.37E+07 | up |
| <i>GIMAP2</i>   | NM_015660    | 1.65E-02 | 1.68E+16 | up |
| <i>SLCO4C1</i>  | NM_180991    | 1.66E-02 | 2.50E+01 | up |
| <i>SMCO4</i>    | NM_020179    | 1.67E-02 | 8.37E+26 | up |
| <i>MOAP1</i>    | NM_022151    | 1.67E-02 | 1.16E+10 | up |
| <i>AVEN</i>     | NM_020371    | 1.67E-02 | 7.49E+04 | up |
| <i>RHBDD2</i>   | NM_001040457 | 1.67E-02 | 4.34E+04 | up |
| <i>UBE2R2</i>   | NM_017811    | 1.67E-02 | 1.89E+03 | up |
| <i>KRAS</i>     | NM_004985    | 1.67E-02 | 3.97E+01 | up |
| <i>SNAP23</i>   | NM_003825    | 1.67E-02 | 1.77E+01 | up |
| <i>FKBP4</i>    | NM_002014    | 1.70E-02 | 4.40E+04 | up |
| <i>ERO1A</i>    | NM_014584    | 1.72E-02 | 2.43E+34 | up |
| <i>IRF2BP2</i>  | NM_001077397 | 1.72E-02 | 8.42E+16 | up |
| <i>STAMBPL1</i> | NM_020799    | 1.75E-02 | 1.22E+13 | up |
| <i>CD83</i>     | NM_004233    | 1.77E-02 | 1.73E+21 | up |
| <i>ISG15</i>    | NM_005101    | 1.77E-02 | 6.13E+15 | up |
| <i>DDX17</i>    | NM_006386    | 1.77E-02 | 3.44E+08 | up |
| <i>MS4A6A</i>   | NM_022349    | 1.77E-02 | 1.12E+02 | up |
| <i>ASF1A</i>    | NM_014034    | 1.79E-02 | 1.20E+16 | up |
| <i>CAPZA2</i>   | NM_006136    | 1.81E-02 | 1.40E+20 | up |
| <i>SNRPD2</i>   | NM_177542    | 1.82E-02 | 1.48E+02 | up |
| <i>HSPD1</i>    | NM_199440    | 1.83E-02 | 2.22E+28 | up |
| <i>ITCH</i>     | NM_001257138 | 1.83E-02 | 5.83E+03 | up |
| <i>DCTN6</i>    | NM_006571    | 1.88E-02 | 4.13E+26 | up |
| <i>CHCHD2</i>   | NM_016139    | 1.91E-02 | 3.29E+08 | up |
| <i>COX5A</i>    | NM_004255    | 1.94E-02 | 6.26E+03 | up |
| <i>IFNGR2</i>   | NM_005534    | 1.95E-02 | 6.56E+05 | up |
| <i>TIMM9</i>    | NM_012460    | 1.96E-02 | 5.72E+05 | up |
| <i>BAG3</i>     | NM_004281    | 2.02E-02 | 1.71E+07 | up |
| <i>PSMC2</i>    | NM_002803    | 2.07E-02 | 2.06E+09 | up |
| <i>CDR2</i>     | NM_001802    | 2.11E-02 | 1.31E+04 | up |
| <i>GNAI3</i>    | NM_001282425 | 2.16E-02 | 2.95E+10 | up |
| <i>ILK</i>      | NM_004517    | 2.17E-02 | 2.30E+13 | up |

|                  |              |          |          |    |
|------------------|--------------|----------|----------|----|
| <i>MSTO1</i>     | NR_046294    | 2.18E-02 | 3.54E+03 | up |
| <i>LINC00657</i> | NR_027451    | 2.18E-02 | 3.45E+01 | up |
| <i>APLP2</i>     | NM_001142278 | 2.23E-02 | 2.58E+05 | up |
| <i>IL10RB</i>    | NM_000628    | 2.24E-02 | 4.63E+02 | up |
| <i>FKBP2</i>     | NM_004470    | 2.26E-02 | 1.31E+04 | up |
| <i>SH2D2A</i>    | NM_003975    | 2.26E-02 | 1.42E+03 | up |
| <i>INPP1</i>     | NM_002194    | 2.27E-02 | 3.47E+04 | up |
| <i>PRELID3B</i>  | NM_001256403 | 2.29E-02 | 2.52E+10 | up |
| <i>SLC25A20</i>  | NM_000387    | 2.29E-02 | 1.68E+07 | up |
| <i>LRRC8C</i>    | NM_032270    | 2.29E-02 | 2.12E+03 | up |
| <i>SLC39A8</i>   | NM_001135146 | 2.29E-02 | 4.39E+01 | up |
| <i>FAM76B</i>    | NM_144664    | 2.30E-02 | 2.55E+04 | up |
| <i>PFDN2</i>     | NM_012394    | 2.30E-02 | 3.28E+05 | up |
| <i>DNAJC2</i>    | NM_001129887 | 2.35E-02 | 8.51E+02 | up |
| <i>RPL22</i>     | NM_000983    | 2.37E-02 | 4.24E+06 | up |
| <i>CAPG</i>      | NM_001256139 | 2.37E-02 | 6.03E+31 | up |
| <i>RDX</i>       | NM_001260493 | 2.37E-02 | 2.66E+06 | up |
| <i>SPCS2</i>     | NM_014752    | 2.37E-02 | 1.10E+08 | up |
| <i>CD226</i>     | NM_001303619 | 2.38E-02 | 5.33E+03 | up |
| <i>SGK1</i>      | NM_005627    | 2.38E-02 | 9.76E+01 | up |
| <i>CLEC2D</i>    | NM_001004419 | 2.42E-02 | 1.07E+10 | up |
| <i>SEPHS2</i>    | NM_012248    | 2.44E-02 | 1.67E+01 | up |
| <i>OGT</i>       | NM_181673    | 2.45E-02 | 1.52E+11 | up |
| <i>MCOLN2</i>    | NM_153259    | 2.45E-02 | 4.46E+01 | up |
| <i>APEX1</i>     | NM_080648    | 2.47E-02 | 4.07E+06 | up |
| <i>P4HB</i>      | NM_000918    | 2.48E-02 | 1.95E+22 | up |
| <i>SF3B1</i>     | NM_012433    | 2.50E-02 | 4.24E+21 | up |
| <i>FAM120A</i>   | NM_001286722 | 2.51E-02 | 4.88E+01 | up |
| <i>FAM35BP</i>   | NR_027632    | 2.52E-02 | 2.03E+01 | up |
| <i>RMRP</i>      | NR_003051    | 2.53E-02 | 4.03E+06 | up |
| <i>ADD1</i>      | NM_001119    | 2.53E-02 | 1.02E+03 | up |
| <i>ACADVL</i>    | NM_000018    | 2.54E-02 | 1.70E+01 | up |
| <i>PSMA5</i>     | NM_001199773 | 2.56E-02 | 1.73E+02 | up |
| <i>SESN3</i>     | NM_001271594 | 2.56E-02 | 8.18E+01 | up |
| <i>ELF1</i>      | NM_172373    | 2.62E-02 | 1.79E+02 | up |
| <i>ZNF217</i>    | NM_006526    | 2.62E-02 | 2.62E+01 | up |
| <i>NEK1</i>      | NM_001199399 | 2.66E-02 | 2.46E+04 | up |
| <i>TM2D2</i>     | NM_078473    | 2.69E-02 | 7.85E+02 | up |
| <i>FNBP4</i>     | NM_015308    | 2.71E-02 | 8.58E+02 | up |
| <i>FURIN</i>     | NM_001289823 | 2.72E-02 | 1.96E+03 | up |
| <i>COX7B</i>     | NM_001866    | 2.75E-02 | 1.17E+38 | up |

|                 |              |          |          |    |
|-----------------|--------------|----------|----------|----|
| <i>SEC61G</i>   | NM_014302    | 2.75E-02 | 5.52E+15 | up |
| <i>NDUFV1</i>   | NM_007103    | 2.78E-02 | 4.19E+12 | up |
| <i>SIAH2</i>    | NM_005067    | 2.80E-02 | 1.25E+05 | up |
| <i>RHOH</i>     | NM_001278364 | 2.83E-02 | 7.00E+01 | up |
| <i>SNORA84</i>  | NR_003704    | 2.86E-02 | 1.18E+06 | up |
| <i>MIR3651</i>  | NR_037424    | 2.86E-02 | 2.49E+01 | up |
| <i>RPN1</i>     | NM_002950    | 2.89E-02 | 4.61E+01 | up |
| <i>MIER1</i>    | NM_001077704 | 2.90E-02 | 9.45E+05 | up |
| <i>DNAJA4</i>   | NM_001130183 | 2.91E-02 | 9.19E+23 | up |
| <i>MRPS11</i>   | NM_022839    | 2.91E-02 | 2.68E+08 | up |
| <i>DNTTIP2</i>  | NM_014597    | 2.92E-02 | 1.78E+28 | up |
| <i>MT1F</i>     | NM_005949    | 2.94E-02 | 1.67E+20 | up |
| <i>SEMA4D</i>   | NM_006378    | 2.94E-02 | 1.56E+05 | up |
| <i>RRAGA</i>    | NM_006570    | 2.95E-02 | 3.45E+02 | up |
| <i>PABPC1L</i>  | NM_001124756 | 2.96E-02 | 1.85E+07 | up |
| <i>ZFAND5</i>   | NM_001278244 | 3.02E-02 | 8.81E+08 | up |
| <i>MRPS12</i>   | NM_033362    | 3.03E-02 | 5.35E+05 | up |
| <i>USP22</i>    | NM_015276    | 3.05E-02 | 1.46E+16 | up |
| <i>IL16</i>     | NM_004513    | 3.05E-02 | 6.12E+07 | up |
| <i>STRIP1</i>   | NM_001270768 | 3.06E-02 | 1.03E+13 | up |
| <i>GPR171</i>   | NM_013308    | 3.09E-02 | 3.88E+09 | up |
| <i>HMOX2</i>    | NM_001286271 | 3.12E-02 | 7.22E+05 | up |
| <i>SRSF9</i>    | NM_003769    | 3.17E-02 | 8.68E+12 | up |
| <i>YY1</i>      | NM_003403    | 3.17E-02 | 8.73E+03 | up |
| <i>TSEN15</i>   | NM_052965    | 3.17E-02 | 4.96E+03 | up |
| <i>NCEH1</i>    | NM_001146278 | 3.21E-02 | 7.47E+01 | up |
| <i>UBE2K</i>    | NM_005339    | 3.28E-02 | 4.05E+03 | up |
| <i>SETD5</i>    | NM_001292043 | 3.35E-02 | 1.82E+02 | up |
| <i>ZC3H12A</i>  | NM_025079    | 3.36E-02 | 4.23E+06 | up |
| <i>SREK1</i>    | NM_001077199 | 3.37E-02 | 2.16E+02 | up |
| <i>USP9Y</i>    | NM_004654    | 3.38E-02 | 9.70E+02 | up |
| <i>DNAJC3</i>   | NM_006260    | 3.40E-02 | 5.81E+16 | up |
| <i>FGFR1</i>    | NM_001174066 | 3.43E-02 | 1.26E+08 | up |
| <i>LDB1</i>     | NM_001113407 | 3.49E-02 | 2.60E+02 | up |
| <i>TBC1D15</i>  | NM_001146213 | 3.49E-02 | 5.94E+04 | up |
| <i>CDK2AP1</i>  | NM_001270433 | 3.49E-02 | 6.66E+04 | up |
| <i>FAM118A</i>  | NM_017911    | 3.51E-02 | 8.26E+14 | up |
| <i>ZFAS1</i>    | NR_003604    | 3.51E-02 | 4.37E+07 | up |
| <i>EML4</i>     | NM_001145076 | 3.55E-02 | 1.46E+20 | up |
| <i>C21orf33</i> | NM_004649    | 3.61E-02 | 9.43E+04 | up |
| <i>DNAJC15</i>  | NM_013238    | 3.62E-02 | 9.29E+02 | up |

|                  |              |          |          |    |
|------------------|--------------|----------|----------|----|
| <i>PELI1</i>     | NM_020651    | 3.65E-02 | 8.55E+03 | up |
| <i>RBM39</i>     | NR_040724    | 3.65E-02 | 1.55E+03 | up |
| <i>JTB</i>       | NM_006694    | 3.66E-02 | 7.78E+11 | up |
| <i>NFKBID</i>    | NM_139239    | 3.69E-02 | 2.23E+03 | up |
| <i>RAB6A</i>     | NM_002869    | 3.73E-02 | 2.71E+06 | up |
| <i>KIF3A</i>     | NM_007054    | 3.74E-02 | 2.09E+04 | up |
| <i>PPCS</i>      | NM_001077447 | 3.75E-02 | 9.02E+08 | up |
| <i>WDR36</i>     | NM_139281    | 3.76E-02 | 4.81E+03 | up |
| <i>CNOT2</i>     | NR_037615    | 3.76E-02 | 7.74E+01 | up |
| <i>FBXO7</i>     | NM_001033024 | 3.80E-02 | 2.73E+07 | up |
| <i>ACTR3</i>     | NM_001277140 | 3.80E-02 | 9.34E+06 | up |
| <i>IFNAR2</i>    | NM_000874    | 3.82E-02 | 1.96E+10 | up |
| <i>LINC00852</i> | NR_026829    | 3.83E-02 | 1.61E+06 | up |
| <i>SRP54</i>     | NM_003136    | 3.84E-02 | 1.83E+05 | up |
| <i>FAM102B</i>   | NM_001010883 | 3.85E-02 | 4.29E+01 | up |
| <i>MRPL14</i>    | NM_032111    | 3.89E-02 | 6.72E+17 | up |
| <i>LGALS8</i>    | NM_006499    | 3.89E-02 | 1.88E+01 | up |
| <i>TADA2A</i>    | NM_001291918 | 3.89E-02 | 3.00E+08 | up |
| <i>TDG</i>       | NM_003211    | 3.89E-02 | 3.34E+03 | up |
| <i>NDUFA11</i>   | NM_175614    | 3.93E-02 | 3.11E+07 | up |
| <i>AGGF1</i>     | NM_018046    | 3.94E-02 | 1.87E+05 | up |
| <i>BNIP1</i>     | NM_001205    | 3.98E-02 | 1.82E+10 | up |
| <i>PAPOLA</i>    | NM_001293632 | 3.98E-02 | 1.05E+09 | up |
| <i>MTHFD2</i>    | NM_006636    | 3.98E-02 | 3.68E+05 | up |
| <i>NFU1</i>      | NR_045631    | 3.98E-02 | 3.18E+02 | up |
| <i>CHMP6</i>     | NM_024591    | 3.98E-02 | 2.83E+02 | up |
| <i>PRPS2</i>     | NM_002765    | 4.04E-02 | 8.66E+13 | up |
| <i>MLLT3</i>     | NM_001286691 | 4.07E-02 | 2.07E+05 | up |
| <i>PLEKHO1</i>   | NM_001304723 | 4.11E-02 | 3.14E+01 | up |
| <i>IL32</i>      | NM_001308078 | 4.14E-02 | 2.87E+23 | up |
| <i>PCBP2</i>     | NM_005016    | 4.14E-02 | 3.20E+05 | up |
| <i>PSMB9</i>     | NM_002800    | 4.15E-02 | 1.93E+32 | up |
| <i>PPM1A</i>     | NM_177951    | 4.17E-02 | 1.84E+01 | up |
| <i>TRAPPC2L</i>  | NM_016209    | 4.17E-02 | 3.11E+16 | up |
| <i>EFHD2</i>     | NM_024329    | 4.19E-02 | 6.47E+03 | up |
| <i>DUSP10</i>    | NR_111939    | 4.21E-02 | 1.51E+06 | up |
| <i>TSPAN13</i>   | NM_014399    | 4.27E-02 | 3.46E+03 | up |
| <i>ZNF326</i>    | NM_182975    | 4.27E-02 | 9.17E+01 | up |
| <i>NR1H2</i>     | NM_001256647 | 4.27E-02 | 2.21E+01 | up |
| <i>RBM48</i>     | NM_032120    | 4.28E-02 | 4.67E+13 | up |
| <i>MRPL33</i>    | NM_145330    | 4.28E-02 | 6.39E+10 | up |

|                 |              |          |          |    |
|-----------------|--------------|----------|----------|----|
| <i>TMEM167A</i> | NM_174909    | 4.28E-02 | 3.59E+08 | up |
| <i>HIST1H1D</i> | NM_005320    | 4.28E-02 | 1.96E+11 | up |
| <i>CLTB</i>     | NM_001834    | 4.31E-02 | 1.30E+22 | up |
| <i>CCDC47</i>   | NM_020198    | 4.35E-02 | 1.10E+08 | up |
| <i>SAMD9</i>    | NM_001193307 | 4.35E-02 | 1.87E+06 | up |
| <i>NXT2</i>     | NM_001242618 | 4.35E-02 | 2.60E+02 | up |
| <i>VEGFB</i>    | NM_003377    | 4.38E-02 | 2.29E+01 | up |
| <i>BATF</i>     | NM_006399    | 4.47E-02 | 2.08E+19 | up |
| <i>STX17</i>    | NM_017919    | 4.48E-02 | 6.23E+02 | up |
| <i>SRI</i>      | NM_003130    | 4.52E-02 | 9.88E+03 | up |
| <i>PRKD3</i>    | NM_005813    | 4.53E-02 | 4.80E+04 | up |
| <i>NOMO3</i>    | NM_001004067 | 4.53E-02 | 2.01E+01 | up |
| <i>PBDC1</i>    | NM_001300888 | 4.59E-02 | 3.31E+03 | up |
| <i>NASP</i>     | NM_002482    | 4.63E-02 | 1.11E+07 | up |
| <i>PDCD11</i>   | NM_014976    | 4.65E-02 | 7.15E+02 | up |
| <i>SERPINB9</i> | NM_004155    | 4.71E-02 | 1.26E+38 | up |
| <i>MGA</i>      | NM_001164273 | 4.94E-02 | 8.93E+01 | up |
| <i>DENND4C</i>  | NM_017925    | 4.94E-02 | 2.28E+01 | up |
| <i>DYNLT1</i>   | NM_006519    | 4.97E-02 | 2.90E+35 | up |
| <i>RPS3</i>     | NM_001005    | 4.97E-02 | 2.45E+02 | up |

**Table S8. Full gene ontology analysis of T7**(FDR-adjusted  $p < 0.05$  by Fisher)

| <b>GO biological process complete</b>                              | <b>Enrichment</b> | <b>FDR-adjusted p value</b> |
|--------------------------------------------------------------------|-------------------|-----------------------------|
| regulation of leukocyte proliferation (GO:0070663)                 | 24.3              | 6.6E-06                     |
| regulation of mononuclear cell proliferation (GO:0032944)          | 25.3              | 7.4E-06                     |
| negative regulation of cell activation (GO:0050866)                | 26.4              | 1.2E-05                     |
| negative regulation of T cell activation (GO:0050868)              | 39.9              | 1.3E-05                     |
| regulation of lymphocyte proliferation (GO:0050670)                | 25.4              | 1.4E-05                     |
| regulation of cell-cell adhesion (GO:0022407)                      | 13.7              | 1.5E-05                     |
| negative regulation of leukocyte cell-cell adhesion (GO:1903038)   | 37.1              | 1.7E-05                     |
| regulation of lymphocyte activation (GO:0051249)                   | 12.2              | 3.3E-05                     |
| negative regulation of T cell proliferation (GO:0042130)           | 58.0              | 3.4E-05                     |
| positive regulation of leukocyte activation (GO:0002696)           | 13.9              | 7.6E-05                     |
| regulation of regulatory T cell differentiation (GO:0045589)       | > 100             | 8.1E-05                     |
| immune response (GO:0006955)                                       | 5.2               | 8.4E-05                     |
| regulation of leukocyte activation (GO:0002694)                    | 10.7              | 8.6E-05                     |
| positive regulation of cell activation (GO:0050867)                | 13.5              | 8.8E-05                     |
| negative regulation of cell-cell adhesion (GO:0022408)             | 25.5              | 9.5E-05                     |
| negative regulation of response to external stimulus (GO:0032102)  | 16.6              | 1.2E-04                     |
| regulation of cell activation (GO:0050865)                         | 10.0              | 1.2E-04                     |
| negative regulation of B cell activation (GO:0050869)              | 79.7              | 1.7E-04                     |
| regulation of B cell activation (GO:0050864)                       | 22.4              | 1.7E-04                     |
| T cell selection (GO:0045058)                                      | 70.9              | 2.4E-04                     |
| regulation of cell adhesion (GO:0030155)                           | 8.6               | 3.7E-04                     |
| positive regulation of lymphocyte activation (GO:0051251)          | 13.4              | 4.0E-04                     |
| negative regulation of inflammatory response (GO:0050728)          | 29.0              | 4.7E-04                     |
| regulation of T cell differentiation (GO:0045580)                  | 25.7              | 8.0E-04                     |
| positive regulation of biological process (GO:0048518)             | 2.5               | 8.6E-04                     |
| negative regulation of cell adhesion (GO:0007162)                  | 16.1              | 8.8E-04                     |
| regulation of inflammatory response (GO:0050727)                   | 11.7              | 8.8E-04                     |
| positive regulation of lymphocyte proliferation (GO:0050671)       | 24.3              | 9.2E-04                     |
| positive regulation of mononuclear cell proliferation (GO:0032946) | 24.2              | 9.3E-04                     |
| cytokine production (GO:0001816)                                   | 23.6              | 9.5E-04                     |
| negative regulation of immune system process (GO:0002683)          | 11.2              | 9.7E-04                     |
| negative regulation of cytokine secretion (GO:0050710)             | 44.8              | 9.7E-04                     |
| positive regulation of leukocyte proliferation (GO:0070665)        | 23.3              | 9.7E-04                     |
| regulation of response to external stimulus (GO:0032101)           | 7.3               | 9.9E-04                     |
| regulation of leukocyte differentiation (GO:1902105)               | 15.1              | 1.0E-03                     |



|                                                                                                                                                      |       |         |
|------------------------------------------------------------------------------------------------------------------------------------------------------|-------|---------|
| positive regulation of cell-cell adhesion (GO:0022409)                                                                                               | 14.9  | 1.1E-03 |
| regulation of B cell proliferation (GO:0030888)                                                                                                      | 41.1  | 1.2E-03 |
| regulation of hemopoiesis (GO:1903706)                                                                                                               | 10.6  | 1.2E-03 |
| negative regulation of B cell proliferation (GO:0030889)                                                                                             | > 100 | 1.3E-03 |
| regulation of lymphocyte differentiation (GO:0045619)                                                                                                | 21.1  | 1.4E-03 |
| regulation of cytokine production (GO:0001817)                                                                                                       | 8.2   | 1.4E-03 |
| regulation of interleukin-2 biosynthetic process (GO:0045076)                                                                                        | > 100 | 1.4E-03 |
| positive regulation of cellular process (GO:0048522)                                                                                                 | 2.6   | 2.0E-03 |
| negative regulation of defense response (GO:0031348)                                                                                                 | 18.9  | 2.1E-03 |
| regulation of gene expression (GO:0010468)                                                                                                           | 2.6   | 2.9E-03 |
| negative regulation of interleukin-1 production (GO:0032692)                                                                                         | 79.7  | 2.9E-03 |
| positive regulation of RNA metabolic process (GO:0051254)                                                                                            | 4.7   | 3.1E-03 |
| positive regulation of gene expression (GO:0010628)                                                                                                  | 4.2   | 3.1E-03 |
| regulation of immune system process (GO:0002682)                                                                                                     | 4.6   | 3.6E-03 |
| immune system process (GO:0002376)                                                                                                                   | 3.5   | 3.8E-03 |
| positive regulation of T cell proliferation (GO:0042102)                                                                                             | 27.1  | 4.3E-03 |
| regulation of cytokine biosynthetic process (GO:0042035)                                                                                             | 26.6  | 4.5E-03 |
| regulation of cell proliferation (GO:0042127)                                                                                                        | 4.4   | 4.7E-03 |
| regulation of isotype switching (GO:0045191)                                                                                                         | 63.8  | 4.7E-03 |
| positive regulation of macromolecule metabolic process (GO:0010604)                                                                                  | 3.2   | 4.7E-03 |
| regulation of RNA metabolic process (GO:0051252)                                                                                                     | 2.8   | 5.0E-03 |
| positive regulation of T cell activation (GO:0050870)                                                                                                | 14.9  | 5.2E-03 |
| lymphocyte differentiation (GO:0030098)                                                                                                              | 14.7  | 5.4E-03 |
| positive regulation of immune system process (GO:0002684)                                                                                            | 5.5   | 5.4E-03 |
| regulation of defense response (GO:0031347)                                                                                                          | 6.5   | 5.5E-03 |
| positive regulation of leukocyte cell-cell adhesion (GO:1903039)                                                                                     | 14.3  | 5.9E-03 |
| regulation of multi-organism process (GO:0043900)                                                                                                    | 9.8   | 6.9E-03 |
| positive regulation of cell adhesion (GO:0045785)                                                                                                    | 9.7   | 7.1E-03 |
| response to organic substance (GO:0010033)                                                                                                           | 3.2   | 7.1E-03 |
| negative regulation of protein secretion (GO:0050709)                                                                                                | 22.4  | 7.2E-03 |
| positive regulation of cytokine production (GO:0001819)                                                                                              | 9.6   | 7.2E-03 |
| regulation of response to stimulus (GO:0048583)                                                                                                      | 2.7   | 7.6E-03 |
| negative regulation of cytokine production (GO:0001818)                                                                                              | 13.1  | 8.2E-03 |
| negative regulation of peptide secretion (GO:0002792)                                                                                                | 21.3  | 8.2E-03 |
| regulation of I-kappaB kinase/NF-kappaB signaling (GO:0043122)                                                                                       | 12.9  | 8.4E-03 |
| regulation of adaptive immune response based on somatic recombination of immune receptors built from immunoglobulin superfamily domains (GO:0002822) | 20.9  | 8.6E-03 |
| positive regulation of nucleobase-containing compound metabolic process (GO:0045935)                                                                 | 4.0   | 8.7E-03 |
| positive regulation of metabolic process (GO:0009893)                                                                                                | 2.9   | 9.0E-03 |
| negative regulation of response to biotic stimulus (GO:0002832)                                                                                      | 45.6  | 9.0E-03 |

|                                                                             |       |         |
|-----------------------------------------------------------------------------|-------|---------|
| regulatory T cell differentiation (GO:0045066)                              | > 100 | 9.1E-03 |
| negative regulation of chronic inflammatory response (GO:0002677)           | > 100 | 9.2E-03 |
| T cell differentiation (GO:0030217)                                         | 20.2  | 9.2E-03 |
| adaptive immune response (GO:0002250)                                       | 8.8   | 9.9E-03 |
| regulation of interleukin-10 production (GO:0032653)                        | 42.5  | 1.0E-02 |
| regulation of adaptive immune response (GO:0002819)                         | 19.2  | 1.1E-02 |
| positive regulation of leukocyte differentiation (GO:1902107)               | 19.2  | 1.1E-02 |
| negative regulation of immune response (GO:0050777)                         | 19.0  | 1.1E-02 |
| regulation of interleukin-1-mediated signaling pathway (GO:2000659)         | > 100 | 1.1E-02 |
| regulation of B cell mediated immunity (GO:0002712)                         | 40.7  | 1.1E-02 |
| regulation of immunoglobulin mediated immune response (GO:0002889)          | 40.7  | 1.1E-02 |
| negative regulation of cell proliferation (GO:0008285)                      | 6.8   | 1.1E-02 |
| regulation of nucleobase-containing compound metabolic process (GO:0019219) | 2.5   | 1.1E-02 |
| regulation of molecular function (GO:0065009)                               | 2.8   | 1.2E-02 |
| regulation of cellular process (GO:0050794)                                 | 1.7   | 1.2E-02 |
| regulation of interleukin-2 production (GO:0032663)                         | 37.5  | 1.3E-02 |
| cell surface receptor signaling pathway (GO:0007166)                        | 3.4   | 1.6E-02 |
| leukocyte differentiation (GO:0002521)                                      | 10.5  | 1.7E-02 |
| regulation of signal transduction (GO:0009966)                              | 2.9   | 1.7E-02 |
| regulation of immunoglobulin production (GO:0002637)                        | 33.6  | 1.7E-02 |
| negative regulation of cellular process (GO:0048523)                        | 2.4   | 1.8E-02 |
| negative regulation of biological process (GO:0048519)                      | 2.3   | 1.8E-02 |
| regulation of nitrogen compound metabolic process (GO:0051171)              | 2.1   | 1.9E-02 |
| CD4-positive, alpha-beta T cell lineage commitment (GO:0043373)             | > 100 | 1.9E-02 |
| positive regulation of hemopoiesis (GO:1903708)                             | 15.4  | 2.0E-02 |
| negative regulation of multi-organism process (GO:0043901)                  | 15.0  | 2.2E-02 |
| regulation of cytokine secretion (GO:0050707)                               | 14.9  | 2.2E-02 |
| regulation of chronic inflammatory response (GO:0002676)                    | > 100 | 2.2E-02 |
| regulation of multicellular organismal process (GO:0051239)                 | 3.0   | 2.2E-02 |
| type 2 immune response (GO:0042092)                                         | > 100 | 2.4E-02 |
| alpha-beta T cell lineage commitment (GO:0002363)                           | > 100 | 2.5E-02 |
| regulation of T cell tolerance induction (GO:0002664)                       | > 100 | 2.5E-02 |
| cytokine-mediated signaling pathway (GO:0019221)                            | 7.1   | 2.5E-02 |
| regulation of primary metabolic process (GO:0080090)                        | 2.1   | 2.5E-02 |
| regulation of macromolecule metabolic process (GO:0060255)                  | 2.1   | 2.5E-02 |
| negative regulation of secretion by cell (GO:1903531)                       | 14.3  | 2.5E-02 |
| regulation of transcription, DNA-templated (GO:0006355)                     | 2.6   | 2.5E-02 |
| regulation of nucleic acid-templated transcription (GO:1903506)             | 2.6   | 2.6E-02 |
| regulation of interleukin-1 production (GO:0032652)                         | 27.3  | 2.6E-02 |
| lymphocyte activation (GO:0046649)                                          | 9.2   | 2.6E-02 |
| regulation of RNA biosynthetic process (GO:2001141)                         | 2.6   | 2.6E-02 |

|                                                                                                                                                               |       |         |
|---------------------------------------------------------------------------------------------------------------------------------------------------------------|-------|---------|
| regulation of isotype switching to IgG isotypes (GO:0048302)                                                                                                  | > 100 | 2.7E-02 |
| positive regulation of interleukin-2 biosynthetic process (GO:0045086)                                                                                        | > 100 | 2.7E-02 |
| regulation of DNA recombination (GO:0000018)                                                                                                                  | 26.6  | 2.7E-02 |
| positive regulation of I-kappaB kinase/NF-kappaB signaling (GO:0043123)                                                                                       | 13.5  | 2.8E-02 |
| CD4-positive or CD8-positive, alpha-beta T cell lineage commitment (GO:0043369)                                                                               | 98.1  | 2.9E-02 |
| negative regulation of interleukin-1 secretion (GO:0050711)                                                                                                   | 98.1  | 2.9E-02 |
| negative regulation of lipopolysaccharide-mediated signaling pathway (GO:0031665)                                                                             | 98.1  | 3.0E-02 |
| regulation of alpha-beta T cell activation (GO:0046634)                                                                                                       | 25.5  | 3.0E-02 |
| T cell costimulation (GO:0031295)                                                                                                                             | 25.2  | 3.0E-02 |
| cellular response to cytokine stimulus (GO:0071345)                                                                                                           | 5.4   | 3.0E-02 |
| positive regulation of transcription by RNA polymerase II (GO:0045944)                                                                                        | 4.6   | 3.0E-02 |
| lymphocyte costimulation (GO:0031294)                                                                                                                         | 24.8  | 3.1E-02 |
| biological regulation (GO:0065007)                                                                                                                            | 1.5   | 3.1E-02 |
| response to other organism (GO:0051707)                                                                                                                       | 5.3   | 3.1E-02 |
| positive regulation of transcription, DNA-templated (GO:0045893)                                                                                              | 4.0   | 3.1E-02 |
| positive regulation of RNA biosynthetic process (GO:1902680)                                                                                                  | 4.0   | 3.1E-02 |
| response to external biotic stimulus (GO:0043207)                                                                                                             | 5.3   | 3.1E-02 |
| positive regulation of nucleic acid-templated transcription (GO:1903508)                                                                                      | 4.0   | 3.1E-02 |
| positive regulation of nitrogen compound metabolic process (GO:0051173)                                                                                       | 2.8   | 3.1E-02 |
| positive regulation of adaptive immune response based on somatic recombination of immune receptors built from immunoglobulin superfamily domains (GO:0002824) | 24.5  | 3.1E-02 |
| cellular response to organic substance (GO:0071310)                                                                                                           | 3.3   | 3.1E-02 |
| negative regulation of protein transport (GO:0051224)                                                                                                         | 12.6  | 3.1E-02 |
| regulation of cell communication (GO:0010646)                                                                                                                 | 2.7   | 3.1E-02 |
| negative regulation of macromolecule metabolic process (GO:0010605)                                                                                           | 3.0   | 3.2E-02 |
| negative regulation of secretion (GO:0051048)                                                                                                                 | 12.5  | 3.2E-02 |
| positive regulation of adaptive immune response (GO:0002821)                                                                                                  | 23.3  | 3.3E-02 |
| negative regulation of establishment of protein localization (GO:1904950)                                                                                     | 12.3  | 3.3E-02 |
| positive regulation of lymphocyte differentiation (GO:0045621)                                                                                                | 23.3  | 3.3E-02 |
| regulation of biological process (GO:0050789)                                                                                                                 | 1.6   | 3.3E-02 |
| negative regulation of response to stimulus (GO:0048585)                                                                                                      | 3.9   | 3.4E-02 |
| regulation of signaling (GO:0023051)                                                                                                                          | 2.6   | 3.4E-02 |
| regulation of cellular metabolic process (GO:0031323)                                                                                                         | 2.1   | 3.4E-02 |
| regulation of DNA binding transcription factor activity (GO:0051090)                                                                                          | 8.2   | 3.5E-02 |
| positive regulation of cell proliferation (GO:0008284)                                                                                                        | 5.1   | 3.5E-02 |
| negative regulation of interleukin-12 production (GO:0032695)                                                                                                 | 79.7  | 3.5E-02 |
| leukocyte activation (GO:0045321)                                                                                                                             | 5.1   | 3.5E-02 |
| response to insulin (GO:0032868)                                                                                                                              | 11.9  | 3.6E-02 |

|                                                                |      |         |
|----------------------------------------------------------------|------|---------|
| response to biotic stimulus (GO:0009607)                       | 5.1  | 3.6E-02 |
| T cell activation (GO:0042110)                                 | 11.7 | 3.7E-02 |
| regulation of tolerance induction (GO:0002643)                 | 75.0 | 3.8E-02 |
| positive regulation of cellular metabolic process (GO:0031325) | 2.7  | 3.9E-02 |
| T cell lineage commitment (GO:0002360)                         | 70.9 | 4.2E-02 |
| response to cytokine (GO:0034097)                              | 4.9  | 4.6E-02 |
| defense response to protozoan (GO:0042832)                     | 67.1 | 4.6E-02 |
| regulation of protein secretion (GO:0050708)                   | 7.5  | 4.7E-02 |
| antigen receptor-mediated signaling pathway (GO:0050851)       | 10.8 | 4.8E-02 |
| response to protozoan (GO:0001562)                             | 63.8 | 4.9E-02 |

**Table S9. Full gene ontology analysis of T8 biological functions**(FDR-adjusted  $p < 0.05$  by Fisher)

| <b>GO biological process complete</b>                               | <b>Enrichment</b> | <b>FDR-adjusted p value</b> |
|---------------------------------------------------------------------|-------------------|-----------------------------|
| cellular process (GO:0009987)                                       | 1.28              | 3.26E-17                    |
| positive regulation of biological process (GO:0048518)              | 1.89              | 3.36E-17                    |
| regulation of cellular protein metabolic process (GO:0032268)       | 2.5               | 7.55E-16                    |
| immune system process (GO:0002376)                                  | 2.48              | 8.68E-16                    |
| negative regulation of biological process (GO:0048519)              | 1.93              | 8.81E-16                    |
| biological regulation (GO:0065007)                                  | 1.39              | 1.34E-15                    |
| regulation of protein metabolic process (GO:0051246)                | 2.39              | 1.71E-15                    |
| response to organic substance (GO:0010033)                          | 2.38              | 2.65E-15                    |
| regulation of biological process (GO:0050789)                       | 1.41              | 8.03E-15                    |
| regulation of response to stimulus (GO:0048583)                     | 2.02              | 1.10E-14                    |
| positive regulation of cellular process (GO:0048522)                | 1.88              | 1.52E-14                    |
| cellular response to chemical stimulus (GO:0070887)                 | 2.37              | 2.40E-14                    |
| regulation of metabolic process (GO:0019222)                        | 1.69              | 2.46E-14                    |
| regulation of cellular metabolic process (GO:0031323)               | 1.73              | 3.47E-14                    |
| regulation of macromolecule metabolic process (GO:0060255)          | 1.73              | 4.63E-14                    |
| regulation of cellular process (GO:0050794)                         | 1.43              | 6.65E-14                    |
| regulation of immune system process (GO:0002682)                    | 2.89              | 1.28E-13                    |
| negative regulation of cellular process (GO:0048523)                | 1.92              | 1.42E-13                    |
| regulation of molecular function (GO:0065009)                       | 2.11              | 1.53E-13                    |
| signal transduction (GO:0007165)                                    | 1.84              | 2.16E-13                    |
| cellular response to organic substance (GO:0071310)                 | 2.49              | 3.44E-13                    |
| regulation of catalytic activity (GO:0050790)                       | 2.41              | 4.09E-13                    |
| regulation of primary metabolic process (GO:0080090)                | 1.7               | 6.03E-13                    |
| regulation of immune response (GO:0050776)                          | 3.32              | 6.76E-13                    |
| regulation of nitrogen compound metabolic process (GO:0051171)      | 1.71              | 1.36E-12                    |
| positive regulation of immune system process (GO:0002684)           | 3.25              | 5.08E-12                    |
| cellular response to stimulus (GO:0051716)                          | 1.65              | 5.45E-12                    |
| positive regulation of metabolic process (GO:0009893)               | 2.06              | 5.58E-12                    |
| negative regulation of macromolecule metabolic process (GO:0010605) | 2.26              | 6.05E-12                    |
| response to cytokine (GO:0034097)                                   | 3.41              | 6.86E-12                    |
| cell surface receptor signaling pathway (GO:0007166)                | 2.35              | 7.30E-12                    |
| positive regulation of macromolecule metabolic process (GO:0010604) | 2.11              | 8.06E-12                    |
| negative regulation of metabolic process (GO:0009892)               | 2.16              | 1.08E-11                    |
| symbiont process (GO:0044403)                                       | 3.72              | 1.89E-11                    |

|                                                                         |      |          |
|-------------------------------------------------------------------------|------|----------|
| cellular response to cytokine stimulus (GO:0071345)                     | 3.51 | 2.09E-11 |
| interspecies interaction between organisms (GO:0044419)                 | 3.62 | 2.42E-11 |
| signaling (GO:0023052)                                                  | 1.73 | 2.42E-11 |
| cell communication (GO:0007154)                                         | 1.71 | 3.58E-11 |
| response to chemical (GO:0042221)                                       | 1.86 | 5.12E-11 |
| positive regulation of response to stimulus (GO:0048584)                | 2.31 | 7.10E-11 |
| negative regulation of protein metabolic process (GO:0051248)           | 3    | 8.76E-11 |
| response to stimulus (GO:0050896)                                       | 1.5  | 9.35E-11 |
| positive regulation of cellular metabolic process (GO:0031325)          | 2.04 | 1.39E-10 |
| response to stress (GO:0006950)                                         | 1.97 | 1.39E-10 |
| organonitrogen compound metabolic process (GO:1901564)                  | 1.68 | 1.52E-10 |
| Unclassified (UNCLASSIFIED)                                             | 0.26 | 2.34E-10 |
| biological_process (GO:0008150)                                         | 1.15 | 2.39E-10 |
| regulation of cell communication (GO:0010646)                           | 1.96 | 2.40E-10 |
| regulation of signal transduction (GO:0009966)                          | 2.02 | 2.75E-10 |
| negative regulation of cellular protein metabolic process (GO:0032269)  | 3    | 3.19E-10 |
| negative regulation of nitrogen compound metabolic process (GO:0051172) | 2.2  | 3.66E-10 |
| transport (GO:0006810)                                                  | 1.8  | 3.72E-10 |
| establishment of localization (GO:0051234)                              | 1.78 | 3.99E-10 |
| regulation of signaling (GO:0023051)                                    | 1.94 | 4.84E-10 |
| localization (GO:0051179)                                               | 1.67 | 5.71E-10 |
| cell activation (GO:0001775)                                            | 3.02 | 5.81E-10 |
| cellular response to stress (GO:0033554)                                | 2.51 | 8.20E-10 |
| regulation of protein modification process (GO:0031399)                 | 2.42 | 8.46E-10 |
| negative regulation of programmed cell death (GO:0043069)               | 3.22 | 8.58E-10 |
| positive regulation of nitrogen compound metabolic process (GO:0051173) | 2.02 | 8.64E-10 |
| viral process (GO:0016032)                                              | 3.6  | 1.38E-09 |
| negative regulation of cell death (GO:0060548)                          | 3.07 | 1.38E-09 |
| regulation of intracellular signal transduction (GO:1902531)            | 2.39 | 1.40E-09 |
| response to abiotic stimulus (GO:0009628)                               | 2.86 | 1.48E-09 |
| negative regulation of apoptotic process (GO:0043066)                   | 3.2  | 1.57E-09 |
| multi-organism process (GO:0051704)                                     | 2.15 | 1.91E-09 |
| response to oxygen levels (GO:0070482)                                  | 4.7  | 2.62E-09 |
| protein folding (GO:0006457)                                            | 5.99 | 3.28E-09 |
| positive regulation of signal transduction (GO:0009967)                 | 2.5  | 3.66E-09 |
| regulation of programmed cell death (GO:0043067)                        | 2.5  | 3.80E-09 |
| regulation of cell death (GO:0010941)                                   | 2.43 | 4.41E-09 |
| negative regulation of cellular metabolic process (GO:0031324)          | 2.08 | 4.46E-09 |

|                                                                        |      |          |
|------------------------------------------------------------------------|------|----------|
| positive regulation of cell communication (GO:0010647)                 | 2.41 | 5.90E-09 |
| establishment of localization in cell (GO:0051649)                     | 2.49 | 6.08E-09 |
| regulation of apoptotic process (GO:0042981)                           | 2.49 | 6.39E-09 |
| positive regulation of molecular function (GO:0044093)                 | 2.34 | 6.40E-09 |
| positive regulation of signaling (GO:0023056)                          | 2.4  | 6.58E-09 |
| immune response (GO:0006955)                                           | 2.37 | 6.76E-09 |
| leukocyte activation (GO:0045321)                                      | 3.06 | 9.24E-09 |
| regulation of multicellular organismal process (GO:0051239)            | 1.99 | 9.99E-09 |
| regulation of cytokine production (GO:0001817)                         | 3.55 | 1.00E-08 |
| regulation of biological quality (GO:0065008)                          | 1.83 | 1.31E-08 |
| phosphorus metabolic process (GO:0006793)                              | 2.14 | 1.42E-08 |
| negative regulation of protein modification process (GO:0031400)       | 3.46 | 3.44E-08 |
| phosphate-containing compound metabolic process (GO:0006796)           | 2.15 | 3.50E-08 |
| positive regulation of immune response (GO:0050778)                    | 3.18 | 3.73E-08 |
| immune response-regulating signaling pathway (GO:0002764)              | 3.69 | 3.75E-08 |
| intracellular signal transduction (GO:0035556)                         | 2.35 | 4.47E-08 |
| positive regulation of protein metabolic process (GO:0051247)          | 2.34 | 4.84E-08 |
| response to decreased oxygen levels (GO:0036293)                       | 4.52 | 4.87E-08 |
| positive regulation of catalytic activity (GO:0043085)                 | 2.43 | 7.19E-08 |
| positive regulation of cellular protein metabolic process (GO:0032270) | 2.37 | 7.23E-08 |
| regulation of protein localization (GO:0032880)                        | 2.73 | 7.50E-08 |
| regulation of response to stress (GO:0080134)                          | 2.42 | 7.81E-08 |
| apoptotic process (GO:0006915)                                         | 2.87 | 8.87E-08 |
| regulation of leukocyte cell-cell adhesion (GO:1903037)                | 4.51 | 1.03E-07 |
| T cell receptor signaling pathway (GO:0050852)                         | 6.88 | 1.13E-07 |
| cellular localization (GO:0051641)                                     | 2.1  | 1.21E-07 |
| response to hypoxia (GO:0001666)                                       | 4.46 | 1.25E-07 |
| cellular metabolic process (GO:0044237)                                | 1.38 | 1.25E-07 |
| phosphorylation (GO:0016310)                                           | 2.48 | 1.61E-07 |
| regulation of establishment of protein localization (GO:0070201)       | 2.94 | 1.71E-07 |
| regulation of T cell activation (GO:0050863)                           | 4.54 | 1.82E-07 |
| regulation of I-kappaB kinase/NF-kappaB signaling (GO:0043122)         | 5.18 | 1.95E-07 |
| cellular protein metabolic process (GO:0044267)                        | 1.74 | 2.96E-07 |
| cellular response to oxygen levels (GO:0071453)                        | 5.56 | 3.49E-07 |
| nitrogen compound metabolic process (GO:0006807)                       | 1.39 | 3.50E-07 |
| regulation of lymphocyte activation (GO:0051249)                       | 3.7  | 3.51E-07 |
| immune response-activating signal transduction (GO:0002757)            | 3.6  | 3.56E-07 |
| homeostatic process (GO:0042592)                                       | 2.33 | 3.94E-07 |
| regulation of cell-cell adhesion (GO:0022407)                          | 3.89 | 4.22E-07 |

|                                                                                                |      |          |
|------------------------------------------------------------------------------------------------|------|----------|
| negative regulation of molecular function (GO:0044092)                                         | 2.52 | 4.42E-07 |
| positive regulation of intracellular signal transduction (GO:1902533)                          | 2.7  | 4.64E-07 |
| regulation of leukocyte activation (GO:0002694)                                                | 3.46 | 4.65E-07 |
| regulation of cell activation (GO:0050865)                                                     | 3.34 | 5.69E-07 |
| regulation of transcription from RNA polymerase II promoter in response to stress (GO:0043618) | 7.65 | 6.93E-07 |
| regulation of proteolysis (GO:0030162)                                                         | 2.83 | 7.12E-07 |
| protein localization (GO:0008104)                                                              | 2.09 | 7.45E-07 |
| regulation of transferase activity (GO:0051338)                                                | 2.61 | 8.08E-07 |
| positive regulation of leukocyte cell-cell adhesion (GO:1903039)                               | 5.21 | 8.65E-07 |
| protein transport (GO:0015031)                                                                 | 2.35 | 8.80E-07 |
| cotranslational protein targeting to membrane (GO:0006613)                                     | 8.22 | 9.37E-07 |
| establishment of protein localization (GO:0045184)                                             | 2.3  | 9.68E-07 |
| macromolecule localization (GO:0033036)                                                        | 1.98 | 9.68E-07 |
| immune response-regulating cell surface receptor signaling pathway (GO:0002768)                | 3.72 | 9.78E-07 |
| negative regulation of catalytic activity (GO:0043086)                                         | 2.74 | 1.01E-06 |
| activation of immune response (GO:0002253)                                                     | 3.31 | 1.11E-06 |
| myeloid leukocyte activation (GO:0002274)                                                      | 3.3  | 1.17E-06 |
| regulation of DNA-templated transcription in response to stress (GO:0043620)                   | 7.27 | 1.18E-06 |
| protein targeting (GO:0006605)                                                                 | 4.6  | 1.18E-06 |
| regulation of gene expression (GO:0010468)                                                     | 1.61 | 1.18E-06 |
| protein targeting to ER (GO:0045047)                                                           | 7.98 | 1.22E-06 |
| intracellular transport (GO:0046907)                                                           | 2.39 | 1.43E-06 |
| translational initiation (GO:0006413)                                                          | 6.5  | 1.51E-06 |
| regulation of cysteine-type endopeptidase activity involved in apoptotic process (GO:0043281)  | 5.28 | 1.52E-06 |
| cytokine-mediated signaling pathway (GO:0019221)                                               | 3.33 | 1.56E-06 |
| protein metabolic process (GO:0019538)                                                         | 1.61 | 1.62E-06 |
| leukocyte activation involved in immune response (GO:0002366)                                  | 3.17 | 1.66E-06 |
| peptide transport (GO:0015833)                                                                 | 2.31 | 1.67E-06 |
| regulation of macromolecule biosynthetic process (GO:0010556)                                  | 1.64 | 1.67E-06 |
| establishment of protein localization to endoplasmic reticulum (GO:0072599)                    | 7.68 | 1.78E-06 |
| cell activation involved in immune response (GO:0002263)                                       | 3.14 | 1.87E-06 |
| antigen receptor-mediated signaling pathway (GO:0050851)                                       | 4.91 | 1.88E-06 |
| protein localization to endoplasmic reticulum (GO:0070972)                                     | 6.92 | 1.90E-06 |
| positive regulation of T cell activation (GO:0050870)                                          | 5.16 | 1.99E-06 |
| establishment of protein localization to organelle (GO:0072594)                                | 3.91 | 2.17E-06 |
| amide transport (GO:0042886)                                                                   | 2.27 | 2.30E-06 |



|                                                                                                 |      |          |
|-------------------------------------------------------------------------------------------------|------|----------|
| establishment of protein localization to membrane (GO:0090150)                                  | 5.09 | 2.40E-06 |
| protein localization to organelle (GO:0033365)                                                  | 3.1  | 2.40E-06 |
| regulation of cellular macromolecule biosynthetic process (GO:2000112)                          | 1.64 | 2.61E-06 |
| cell death (GO:0008219)                                                                         | 2.49 | 2.86E-06 |
| SRP-dependent cotranslational protein targeting to membrane (GO:0006614)                        | 8.13 | 2.94E-06 |
| regulation of biosynthetic process (GO:0009889)                                                 | 1.6  | 3.07E-06 |
| cellular protein localization (GO:0034613)                                                      | 2.3  | 3.16E-06 |
| programmed cell death (GO:0012501)                                                              | 2.52 | 3.19E-06 |
| protein targeting to membrane (GO:0006612)                                                      | 6.56 | 3.39E-06 |
| cellular macromolecule localization (GO:0070727)                                                | 2.29 | 3.61E-06 |
| regulation of transcription from RNA polymerase II promoter in response to hypoxia (GO:0061418) | 8.83 | 4.26E-06 |
| positive regulation of lymphocyte activation (GO:0051251)                                       | 4.03 | 4.44E-06 |
| response to unfolded protein (GO:0006986)                                                       | 5.89 | 4.59E-06 |
| metabolic process (GO:0008152)                                                                  | 1.31 | 4.91E-06 |
| primary metabolic process (GO:0044238)                                                          | 1.33 | 5.37E-06 |
| immune effector process (GO:0002252)                                                            | 2.49 | 5.44E-06 |
| positive regulation of cell-cell adhesion (GO:0022409)                                          | 4.52 | 5.70E-06 |
| regulation of peptide transport (GO:0090087)                                                    | 2.7  | 5.82E-06 |
| positive regulation of leukocyte activation (GO:0002696)                                        | 3.8  | 5.98E-06 |
| regulation of transport (GO:0051049)                                                            | 2.04 | 6.24E-06 |
| positive regulation of cytokine production (GO:0001819)                                         | 3.65 | 6.50E-06 |
| regulation of hydrolase activity (GO:0051336)                                                   | 2.34 | 7.79E-06 |
| regulation of cysteine-type endopeptidase activity (GO:2000116)                                 | 4.62 | 8.66E-06 |
| immune response-activating cell surface receptor signaling pathway (GO:0002429)                 | 3.59 | 8.74E-06 |
| protein phosphorylation (GO:0006468)                                                            | 2.52 | 8.96E-06 |
| positive regulation of cell activation (GO:0050867)                                             | 3.7  | 9.19E-06 |
| mitochondrion organization (GO:0007005)                                                         | 3.46 | 9.39E-06 |
| organic substance metabolic process (GO:0071704)                                                | 1.31 | 1.02E-05 |
| cellular response to decreased oxygen levels (GO:0036294)                                       | 5.12 | 1.03E-05 |
| signal transduction by protein phosphorylation (GO:0023014)                                     | 3.54 | 1.10E-05 |
| leukocyte mediated immunity (GO:0002443)                                                        | 2.76 | 1.12E-05 |
| translation (GO:0006412)                                                                        | 3.64 | 1.16E-05 |
| regulation of localization (GO:0032879)                                                         | 1.81 | 1.16E-05 |
| cellular component organization or biogenesis (GO:0071840)                                      | 1.49 | 1.16E-05 |
| viral gene expression (GO:0019080)                                                              | 6.36 | 1.18E-05 |
| positive regulation of defense response (GO:0031349)                                            | 3.51 | 1.21E-05 |
| negative regulation of response to stimulus (GO:0048585)                                        | 2.16 | 1.21E-05 |

|                                                                                         |      |          |
|-----------------------------------------------------------------------------------------|------|----------|
| regulation of phosphorylation (GO:0042325)                                              | 2.15 | 1.35E-05 |
| regulation of cellular biosynthetic process (GO:0031326)                                | 1.57 | 1.35E-05 |
| intracellular protein transport (GO:0006886)                                            | 2.73 | 1.36E-05 |
| cellular homeostasis (GO:0019725)                                                       | 2.64 | 1.37E-05 |
| Fc receptor signaling pathway (GO:0038093)                                              | 4.44 | 1.41E-05 |
| cellular macromolecule catabolic process (GO:0044265)                                   | 2.59 | 1.49E-05 |
| myeloid cell activation involved in immune response (GO:0002275)                        | 3.17 | 1.54E-05 |
| regulation of peptidase activity (GO:0052547)                                           | 3.45 | 1.56E-05 |
| response to topologically incorrect protein (GO:0035966)                                | 5.25 | 1.61E-05 |
| regulation of protein transport (GO:0051223)                                            | 2.66 | 1.66E-05 |
| myeloid leukocyte mediated immunity (GO:0002444)                                        | 3.15 | 1.69E-05 |
| regulation of catabolic process (GO:0009894)                                            | 2.52 | 1.72E-05 |
| regulation of cell proliferation (GO:0042127)                                           | 2.09 | 1.76E-05 |
| viral transcription (GO:0019083)                                                        | 6.63 | 1.96E-05 |
| nitrogen compound transport (GO:0071705)                                                | 2.05 | 1.97E-05 |
| protein stabilization (GO:0050821)                                                      | 5.48 | 2.25E-05 |
| regulation of protein phosphorylation (GO:0001932)                                      | 2.18 | 2.25E-05 |
| MAPK cascade (GO:0000165)                                                               | 3.6  | 2.27E-05 |
| positive regulation of gene expression (GO:0010628)                                     | 1.98 | 2.27E-05 |
| regulation of proteolysis involved in cellular protein catabolic process (GO:1903050)   | 4.26 | 2.31E-05 |
| organonitrogen compound biosynthetic process (GO:1901566)                               | 2.14 | 2.41E-05 |
| response to oxygen-containing compound (GO:1901700)                                     | 2.13 | 2.59E-05 |
| chaperone-mediated protein folding (GO:0061077)                                         | 9.38 | 2.68E-05 |
| regulation of protein catabolic process (GO:0042176)                                    | 3.44 | 2.74E-05 |
| cellular response to hypoxia (GO:0071456)                                               | 5    | 2.76E-05 |
| protein localization to membrane (GO:0072657)                                           | 3.43 | 2.83E-05 |
| regulation of cell adhesion (GO:0030155)                                                | 2.77 | 3.16E-05 |
| regulation of protein modification by small protein conjugation or removal (GO:1903320) | 3.97 | 3.17E-05 |
| peptide biosynthetic process (GO:0043043)                                               | 3.4  | 3.17E-05 |
| peptide metabolic process (GO:0006518)                                                  | 3.03 | 3.19E-05 |
| regulation of protein ubiquitination (GO:0031396)                                       | 4.15 | 3.20E-05 |
| leukocyte degranulation (GO:0043299)                                                    | 3.11 | 3.21E-05 |
| apoptotic signaling pathway (GO:0097190)                                                | 3.95 | 3.26E-05 |
| cellular chemical homeostasis (GO:0055082)                                              | 2.75 | 3.57E-05 |
| purine nucleotide metabolic process (GO:0006163)                                        | 3.47 | 3.85E-05 |
| negative regulation of gene expression (GO:0010629)                                     | 2.02 | 4.09E-05 |
| neutrophil degranulation (GO:0043312)                                                   | 3.13 | 4.57E-05 |
| negative regulation of cell communication (GO:0010648)                                  | 2.19 | 4.78E-05 |

|                                                                             |      |          |
|-----------------------------------------------------------------------------|------|----------|
| neutrophil activation involved in immune response (GO:0002283)              | 3.12 | 4.88E-05 |
| negative regulation of signaling (GO:0023057)                               | 2.18 | 4.95E-05 |
| regulated exocytosis (GO:0045055)                                           | 2.7  | 4.99E-05 |
| regulation of endopeptidase activity (GO:0052548)                           | 3.39 | 5.45E-05 |
| cellular macromolecule metabolic process (GO:0044260)                       | 1.4  | 5.62E-05 |
| positive regulation of cell adhesion (GO:0045785)                           | 3.38 | 5.63E-05 |
| positive regulation of establishment of protein localization (GO:1904951)   | 3    | 5.77E-05 |
| regulation of innate immune response (GO:0045088)                           | 3.27 | 5.82E-05 |
| mitochondrial membrane organization (GO:0007006)                            | 5.86 | 6.13E-05 |
| neutrophil activation (GO:0042119)                                          | 3.07 | 6.27E-05 |
| neutrophil mediated immunity (GO:0002446)                                   | 3.05 | 6.95E-05 |
| regulation of cellular response to stress (GO:0080135)                      | 2.76 | 7.05E-05 |
| granulocyte activation (GO:0036230)                                         | 3.04 | 7.14E-05 |
| regulation of phosphate metabolic process (GO:0019220)                      | 1.96 | 7.75E-05 |
| cellular component organization (GO:0016043)                                | 1.47 | 8.03E-05 |
| positive regulation of innate immune response (GO:0045089)                  | 3.69 | 8.18E-05 |
| regulation of cellular protein catabolic process (GO:1903362)               | 3.85 | 8.42E-05 |
| negative regulation of transferase activity (GO:0051348)                    | 3.4  | 8.62E-05 |
| regulation of nucleobase-containing compound metabolic process (GO:0019219) | 1.54 | 8.69E-05 |
| posttranscriptional regulation of gene expression (GO:0010608)              | 2.92 | 9.13E-05 |
| positive regulation of macromolecule biosynthetic process (GO:0010557)      | 1.96 | 9.14E-05 |
| cellular nitrogen compound metabolic process (GO:0034641)                   | 1.47 | 9.41E-05 |
| Fc-epsilon receptor signaling pathway (GO:0038095)                          | 4.76 | 9.57E-05 |
| organic substance transport (GO:0071702)                                    | 1.85 | 1.13E-04 |
| regulation of phosphorus metabolic process (GO:0051174)                     | 1.94 | 1.20E-04 |
| positive regulation of transport (GO:0051050)                               | 2.32 | 1.31E-04 |
| regulation of cellular catabolic process (GO:0031329)                       | 2.52 | 1.34E-04 |
| purine nucleoside triphosphate metabolic process (GO:0009144)               | 4.08 | 1.38E-04 |
| regulation of defense response (GO:0031347)                                 | 2.51 | 1.38E-04 |
| negative regulation of protein ubiquitination (GO:0031397)                  | 5.36 | 1.41E-04 |
| mitochondrial transport (GO:0006839)                                        | 4.07 | 1.44E-04 |
| purine-containing compound metabolic process (GO:0072521)                   | 3.17 | 1.46E-04 |
| activation of innate immune response (GO:0002218)                           | 4.05 | 1.50E-04 |
| regulation of cellular localization (GO:0060341)                            | 2.39 | 1.51E-04 |
| positive regulation of proteolysis (GO:0045862)                             | 3.25 | 1.59E-04 |
| purine ribonucleoside monophosphate metabolic process (GO:0009167)          | 4.02 | 1.64E-04 |
| nucleoside monophosphate metabolic process (GO:0009123)                     | 3.82 | 1.64E-04 |

|                                                                                                  |      |          |
|--------------------------------------------------------------------------------------------------|------|----------|
| negative regulation of signal transduction (GO:0009968)                                          | 2.17 | 1.70E-04 |
| purine nucleoside monophosphate metabolic process (GO:0009126)                                   | 4    | 1.71E-04 |
| response to organonitrogen compound (GO:0010243)                                                 | 2.37 | 1.72E-04 |
| positive regulation of RNA metabolic process (GO:0051254)                                        | 2.01 | 1.72E-04 |
| organelle organization (GO:0006996)                                                              | 1.63 | 1.75E-04 |
| response to nitrogen compound (GO:1901698)                                                       | 2.27 | 1.77E-04 |
| purine ribonucleotide metabolic process (GO:0009150)                                             | 3.34 | 1.81E-04 |
| secretion by cell (GO:0032940)                                                                   | 2.3  | 1.92E-04 |
| positive regulation of nucleobase-containing compound metabolic process (GO:0045935)             | 1.9  | 2.10E-04 |
| cation homeostasis (GO:0055080)                                                                  | 2.64 | 2.23E-04 |
| chemical homeostasis (GO:0048878)                                                                | 2.28 | 2.23E-04 |
| innate immune response-activating signal transduction (GO:0002758)                               | 4.12 | 2.31E-04 |
| cellular cation homeostasis (GO:0030003)                                                         | 2.73 | 2.65E-04 |
| positive regulation of cellular biosynthetic process (GO:0031328)                                | 1.87 | 2.84E-04 |
| negative regulation of protein modification by small protein conjugation or removal (GO:1903321) | 4.94 | 2.94E-04 |
| ATP metabolic process (GO:0046034)                                                               | 4.27 | 2.95E-04 |
| ribonucleoside monophosphate metabolic process (GO:0009161)                                      | 3.82 | 2.95E-04 |
| lymphocyte activation (GO:0046649)                                                               | 3.34 | 2.95E-04 |
| ribonucleotide metabolic process (GO:0009259)                                                    | 3.2  | 3.13E-04 |
| amide biosynthetic process (GO:0043604)                                                          | 2.91 | 3.27E-04 |
| inorganic ion homeostasis (GO:0098771)                                                           | 2.58 | 3.28E-04 |
| cellular component biogenesis (GO:0044085)                                                       | 1.69 | 3.28E-04 |
| response to temperature stimulus (GO:0009266)                                                    | 4.88 | 3.29E-04 |
| nucleoside triphosphate metabolic process (GO:0009141)                                           | 3.77 | 3.31E-04 |
| purine ribonucleoside triphosphate metabolic process (GO:0009205)                                | 3.96 | 3.50E-04 |
| nucleotide metabolic process (GO:0009117)                                                        | 2.8  | 3.78E-04 |
| regulation of peptide secretion (GO:0002791)                                                     | 2.96 | 3.81E-04 |
| cellular ion homeostasis (GO:0006873)                                                            | 2.66 | 3.93E-04 |
| regulation of hemopoiesis (GO:1903706)                                                           | 3.04 | 4.04E-04 |
| cytokine production (GO:0001816)                                                                 | 5.17 | 4.25E-04 |
| exocytosis (GO:0006887)                                                                          | 2.41 | 4.31E-04 |
| positive regulation of transcription, DNA-templated (GO:0045893)                                 | 1.99 | 4.32E-04 |
| positive regulation of RNA biosynthetic process (GO:1902680)                                     | 1.99 | 4.32E-04 |
| regulation of multi-organism process (GO:0043900)                                                | 3.12 | 4.33E-04 |
| positive regulation of nucleic acid-templated transcription (GO:1903508)                         | 1.99 | 4.34E-04 |
| 'de novo' protein folding (GO:0006458)                                                           | 11   | 4.38E-04 |
| nucleoside phosphate metabolic process (GO:0006753)                                              | 2.77 | 4.38E-04 |

|                                                                                  |       |          |
|----------------------------------------------------------------------------------|-------|----------|
| positive regulation of multicellular organismal process (GO:0051240)             | 1.95  | 4.38E-04 |
| ribonucleoside triphosphate metabolic process (GO:0009199)                       | 3.86  | 4.50E-04 |
| positive regulation of biosynthetic process (GO:0009891)                         | 1.84  | 4.51E-04 |
| mRNA catabolic process (GO:0006402)                                              | 4.07  | 4.66E-04 |
| nucleobase-containing compound catabolic process (GO:0034655)                    | 3.21  | 4.67E-04 |
| immune system development (GO:0002520)                                           | 2.62  | 4.70E-04 |
| macromolecule catabolic process (GO:0009057)                                     | 2.22  | 4.71E-04 |
| RNA catabolic process (GO:0006401)                                               | 3.83  | 4.86E-04 |
| cellular catabolic process (GO:0044248)                                          | 1.88  | 4.88E-04 |
| positive regulation of transferase activity (GO:0051347)                         | 2.53  | 4.89E-04 |
| response to endoplasmic reticulum stress (GO:0034976)                            | 3.81  | 5.03E-04 |
| positive regulation of I-kappaB kinase/NF-kappaB signaling (GO:0043123)          | 4.31  | 5.05E-04 |
| ribose phosphate metabolic process (GO:0019693)                                  | 3.07  | 5.10E-04 |
| cellular amide metabolic process (GO:0043603)                                    | 2.51  | 5.10E-04 |
| cellular response to tumor necrosis factor (GO:0071356)                          | 3.8   | 5.23E-04 |
| regulation of cellular protein localization (GO:1903827)                         | 2.6   | 5.27E-04 |
| positive regulation of protein modification process (GO:0031401)                 | 2.08  | 5.59E-04 |
| regulation of transcription by RNA polymerase II (GO:0006357)                    | 1.79  | 6.03E-04 |
| cellular response to oxygen-containing compound (GO:1901701)                     | 2.25  | 6.28E-04 |
| protein refolding (GO:0042026)                                                   | 20.76 | 6.32E-04 |
| nuclear-transcribed mRNA catabolic process, nonsense-mediated decay (GO:0000184) | 5.37  | 6.55E-04 |
| hydrogen ion transmembrane transport (GO:1902600)                                | 5.37  | 6.57E-04 |
| regulation of protein stability (GO:0031647)                                     | 3.69  | 7.09E-04 |
| homeostasis of number of cells (GO:0048872)                                      | 4.15  | 7.11E-04 |
| regulation of proteasomal protein catabolic process (GO:0061136)                 | 4.45  | 7.30E-04 |
| negative regulation of protein phosphorylation (GO:0001933)                      | 2.98  | 7.74E-04 |
| regulation of cellular response to heat (GO:1900034)                             | 6.71  | 7.91E-04 |
| ion homeostasis (GO:0050801)                                                     | 2.48  | 8.04E-04 |
| negative regulation of ubiquitin protein ligase activity (GO:1904667)            | 6.62  | 8.63E-04 |
| negative regulation of phosphorylation (GO:0042326)                              | 2.85  | 8.93E-04 |
| cellular response to interleukin-4 (GO:0071353)                                  | 12.46 | 9.60E-04 |
| regulation of kinase activity (GO:0043549)                                       | 2.26  | 1.05E-03 |
| proton transport (GO:0015992)                                                    | 4.62  | 1.06E-03 |
| positive regulation of hydrolase activity (GO:0051345)                           | 2.36  | 1.06E-03 |
| cellular component assembly (GO:0022607)                                         | 1.69  | 1.09E-03 |
| aromatic compound catabolic process (GO:0019439)                                 | 2.89  | 1.13E-03 |
| cellular nitrogen compound biosynthetic process (GO:0044271)                     | 1.53  | 1.15E-03 |
| regulation of protein secretion (GO:0050708)                                     | 2.88  | 1.20E-03 |

|                                                                                                        |       |          |
|--------------------------------------------------------------------------------------------------------|-------|----------|
| tumor necrosis factor-mediated signaling pathway (GO:0033209)                                          | 4.96  | 1.25E-03 |
| response to tumor necrosis factor (GO:0034612)                                                         | 3.5   | 1.26E-03 |
| cellular protein modification process (GO:0006464)                                                     | 1.56  | 1.42E-03 |
| protein modification process (GO:0036211)                                                              | 1.56  | 1.42E-03 |
| enzyme linked receptor protein signaling pathway (GO:0007167)                                          | 2.36  | 1.45E-03 |
| response to interleukin-4 (GO:0070670)                                                                 | 11.25 | 1.52E-03 |
| negative regulation of ubiquitin-protein transferase activity (GO:0051444)                             | 6.08  | 1.52E-03 |
| NIK/NF-kappaB signaling (GO:0038061)                                                                   | 6.08  | 1.53E-03 |
| leukocyte differentiation (GO:0002521)                                                                 | 3.26  | 1.60E-03 |
| regulation of protein kinase activity (GO:0045859)                                                     | 2.3   | 1.60E-03 |
| secretion (GO:0046903)                                                                                 | 2.06  | 1.61E-03 |
| activation of cysteine-type endopeptidase activity involved in apoptotic process (GO:0006919)          | 6.01  | 1.63E-03 |
| positive regulation of cellular protein localization (GO:1903829)                                      | 2.9   | 1.63E-03 |
| macromolecule metabolic process (GO:0043170)                                                           | 1.29  | 1.63E-03 |
| negative regulation of cytokine production (GO:0001818)                                                | 3.57  | 1.69E-03 |
| regulation of developmental process (GO:0050793)                                                       | 1.66  | 1.70E-03 |
| negative regulation of phosphate metabolic process (GO:0045936)                                        | 2.51  | 1.72E-03 |
| negative regulation of phosphorus metabolic process (GO:0010563)                                       | 2.51  | 1.76E-03 |
| response to other organism (GO:0051707)                                                                | 2.22  | 1.76E-03 |
| interaction with host (GO:0051701)                                                                     | 4.33  | 1.77E-03 |
| response to external biotic stimulus (GO:0043207)                                                      | 2.21  | 1.81E-03 |
| macromolecule modification (GO:0043412)                                                                | 1.52  | 1.91E-03 |
| heterocycle catabolic process (GO:0046700)                                                             | 2.86  | 1.93E-03 |
| negative regulation of cysteine-type endopeptidase activity involved in apoptotic process (GO:0043154) | 5.81  | 2.02E-03 |
| positive regulation of transcription by RNA polymerase II (GO:0045944)                                 | 2.03  | 2.04E-03 |
| cellular nitrogen compound catabolic process (GO:0044270)                                              | 2.84  | 2.05E-03 |
| positive regulation of cell death (GO:0010942)                                                         | 2.4   | 2.06E-03 |
| circulatory system development (GO:0072359)                                                            | 2.23  | 2.13E-03 |
| nucleobase-containing small molecule metabolic process (GO:0055086)                                    | 2.48  | 2.15E-03 |
| negative regulation of macromolecule biosynthetic process (GO:0010558)                                 | 1.89  | 2.18E-03 |
| regulation of symbiosis, encompassing mutualism through parasitism (GO:0043903)                        | 3.67  | 2.26E-03 |
| positive regulation of protein localization to membrane (GO:1905477)                                   | 5.05  | 2.27E-03 |
| metal ion homeostasis (GO:0055065)                                                                     | 2.51  | 2.35E-03 |
| response to biotic stimulus (GO:0009607)                                                               | 2.18  | 2.35E-03 |
| regulation of RNA metabolic process (GO:0051252)                                                       | 1.47  | 2.35E-03 |

|                                                                                                        |       |          |
|--------------------------------------------------------------------------------------------------------|-------|----------|
| negative regulation of proteolysis (GO:0045861)                                                        | 3.01  | 2.40E-03 |
| regulation of interleukin-12 production (GO:0032655)                                                   | 7.82  | 2.50E-03 |
| positive regulation of organelle organization (GO:0010638)                                             | 2.43  | 2.52E-03 |
| regulation of ubiquitin protein ligase activity (GO:1904666)                                           | 5.57  | 2.64E-03 |
| myeloid cell differentiation (GO:0030099)                                                              | 3.84  | 2.64E-03 |
| positive regulation of protein transport (GO:0051222)                                                  | 2.62  | 2.64E-03 |
| proteasomal protein catabolic process (GO:0010498)                                                     | 3.1   | 2.68E-03 |
| mitochondrial ATP synthesis coupled proton transport (GO:0042776)                                      | 13.84 | 2.70E-03 |
| regulation of proteasomal ubiquitin-dependent protein catabolic process (GO:0032434)                   | 4.93  | 2.70E-03 |
| organic cyclic compound catabolic process (GO:1901361)                                                 | 2.69  | 2.71E-03 |
| protein polyubiquitination (GO:0000209)                                                                | 3.23  | 2.73E-03 |
| nuclear-transcribed mRNA catabolic process (GO:0000956)                                                | 3.8   | 2.84E-03 |
| positive regulation of peptidase activity (GO:0010952)                                                 | 4.08  | 2.85E-03 |
| regulation of cell differentiation (GO:0045595)                                                        | 1.8   | 2.85E-03 |
| cellular metal ion homeostasis (GO:0006875)                                                            | 2.59  | 2.96E-03 |
| toll-like receptor signaling pathway (GO:0002224)                                                      | 5.45  | 2.97E-03 |
| viral life cycle (GO:0019058)                                                                          | 3.78  | 2.97E-03 |
| pattern recognition receptor signaling pathway (GO:0002221)                                            | 4.8   | 3.19E-03 |
| MyD88-independent toll-like receptor signaling pathway (GO:0002756)                                    | 9.43  | 3.23E-03 |
| regulation of calcium-mediated signaling (GO:0050848)                                                  | 6.2   | 3.23E-03 |
| proteasome-mediated ubiquitin-dependent protein catabolic process (GO:0043161)                         | 3.16  | 3.34E-03 |
| nucleobase-containing compound metabolic process (GO:0006139)                                          | 1.41  | 3.36E-03 |
| negative regulation of intracellular signal transduction (GO:1902532)                                  | 2.56  | 3.54E-03 |
| stimulatory C-type lectin receptor signaling pathway (GO:0002223)                                      | 4.73  | 3.57E-03 |
| positive regulation of apoptotic process (GO:0043065)                                                  | 2.42  | 3.57E-03 |
| positive regulation of cysteine-type endopeptidase activity involved in apoptotic process (GO:0043280) | 4.69  | 3.77E-03 |
| regulation of T cell differentiation (GO:0045580)                                                      | 4.69  | 3.78E-03 |
| response to endogenous stimulus (GO:0009719)                                                           | 1.87  | 3.79E-03 |
| cellular response to external stimulus (GO:0071496)                                                    | 3.12  | 3.80E-03 |
| myeloid cell homeostasis (GO:0002262)                                                                  | 5.23  | 3.84E-03 |
| positive regulation of programmed cell death (GO:0043068)                                              | 2.39  | 3.88E-03 |
| regulation of cellular component organization (GO:0051128)                                             | 1.62  | 3.88E-03 |
| innate immune response activating cell surface receptor signaling pathway (GO:0002220)                 | 4.61  | 4.20E-03 |
| hematopoietic or lymphoid organ development (GO:0048534)                                               | 2.46  | 4.29E-03 |
| ATP hydrolysis coupled cation transmembrane transport (GO:0099132)                                     | 7.02  | 4.30E-03 |
| positive regulation of cellular component organization (GO:0051130)                                    | 1.94  | 4.41E-03 |

|                                                                                                             |       |          |
|-------------------------------------------------------------------------------------------------------------|-------|----------|
| regulation of translation (GO:0006417)                                                                      | 2.74  | 4.42E-03 |
| drug metabolic process (GO:0017144)                                                                         | 2.36  | 4.42E-03 |
| membrane organization (GO:0061024)                                                                          | 2.16  | 4.43E-03 |
| positive regulation of endopeptidase activity (GO:0010950)                                                  | 4.15  | 4.56E-03 |
| organic substance catabolic process (GO:1901575)                                                            | 1.76  | 4.56E-03 |
| negative regulation of transport (GO:0051051)                                                               | 2.57  | 4.57E-03 |
| defense response (GO:0006952)                                                                               | 1.9   | 4.73E-03 |
| regulation of nucleic acid-templated transcription (GO:1903506)                                             | 1.46  | 4.82E-03 |
| negative regulation of cellular macromolecule biosynthetic process (GO:2000113)                             | 1.86  | 4.96E-03 |
| vesicle-mediated transport (GO:0016192)                                                                     | 1.72  | 4.99E-03 |
| inner mitochondrial membrane organization (GO:0007007)                                                      | 8.51  | 5.01E-03 |
| negative regulation of biosynthetic process (GO:0009890)                                                    | 1.8   | 5.10E-03 |
| regulation of cellular amide metabolic process (GO:0034248)                                                 | 2.62  | 5.12E-03 |
| cellular aromatic compound metabolic process (GO:0006725)                                                   | 1.39  | 5.29E-03 |
| interleukin-4-mediated signaling pathway (GO:0035771)                                                       | 43.6  | 5.88E-03 |
| regulation of protein ubiquitination involved in ubiquitin-dependent protein catabolic process (GO:2000058) | 4.89  | 5.89E-03 |
| positive regulation of interleukin-5 production (GO:0032754)                                                | 17.89 | 5.91E-03 |
| regulation of cellular amino acid metabolic process (GO:0006521)                                            | 6.56  | 6.00E-03 |
| regulation of adaptive immune response (GO:0002819)                                                         | 4.37  | 6.01E-03 |
| positive regulation of leukocyte differentiation (GO:1902107)                                               | 4.37  | 6.02E-03 |
| T cell activation (GO:0042110)                                                                              | 3.47  | 6.02E-03 |
| regulation of transcription, DNA-templated (GO:0006355)                                                     | 1.45  | 6.02E-03 |
| organophosphate metabolic process (GO:0019637)                                                              | 2     | 6.04E-03 |
| cellular biosynthetic process (GO:0044249)                                                                  | 1.39  | 6.04E-03 |
| regulation of RNA biosynthetic process (GO:2001141)                                                         | 1.46  | 6.05E-03 |
| regulation of organelle organization (GO:0033043)                                                           | 1.89  | 6.06E-03 |
| regulation of MAPK cascade (GO:0043408)                                                                     | 2.24  | 6.07E-03 |
| negative regulation of immune response (GO:0050777)                                                         | 4.34  | 6.26E-03 |
| heterocycle metabolic process (GO:0046483)                                                                  | 1.39  | 6.30E-03 |
| macromolecular complex subunit organization (GO:0043933)                                                    | 1.71  | 6.47E-03 |
| proteolysis involved in cellular protein catabolic process (GO:0051603)                                     | 2.42  | 6.50E-03 |
| protein complex subunit organization (GO:0071822)                                                           | 1.85  | 6.52E-03 |
| positive regulation of cysteine-type endopeptidase activity (GO:2001056)                                    | 4.31  | 6.55E-03 |
| cellular calcium ion homeostasis (GO:0006874)                                                               | 2.72  | 6.58E-03 |
| ubiquitin-dependent protein catabolic process (GO:0006511)                                                  | 2.48  | 6.75E-03 |
| regulation of protein serine/threonine kinase activity (GO:0071900)                                         | 2.48  | 6.77E-03 |
| macromolecular complex assembly (GO:0065003)                                                                | 1.78  | 6.77E-03 |



|                                                                                                  |        |          |
|--------------------------------------------------------------------------------------------------|--------|----------|
| negative regulation of cysteine-type endopeptidase activity (GO:2000117)                         | 4.76   | 6.78E-03 |
| regulation of leukocyte differentiation (GO:1902105)                                             | 3.2    | 7.11E-03 |
| response to interleukin-15 (GO:0070672)                                                          | 16.61  | 7.13E-03 |
| regulation of interleukin-10 production (GO:0032653)                                             | 7.75   | 7.37E-03 |
| detection of stimulus involved in sensory perception (GO:0050906)                                | < 0.01 | 7.37E-03 |
| cellular response to endogenous stimulus (GO:0071495)                                            | 1.93   | 7.38E-03 |
| negative regulation of nucleobase-containing compound metabolic process (GO:0045934)             | 1.79   | 7.40E-03 |
| regulation of DNA metabolic process (GO:0051052)                                                 | 2.69   | 7.46E-03 |
| endoplasmic reticulum unfolded protein response (GO:0030968)                                     | 4.67   | 7.55E-03 |
| sensory perception of chemical stimulus (GO:0007606)                                             | < 0.01 | 7.58E-03 |
| regulation of hematopoietic progenitor cell differentiation (GO:1901532)                         | 5.28   | 7.71E-03 |
| positive regulation of peptide secretion (GO:0002793)                                            | 3.17   | 7.82E-03 |
| positive regulation of NF-kappaB transcription factor activity (GO:0051092)                      | 4.18   | 7.86E-03 |
| transmembrane receptor protein tyrosine kinase signaling pathway (GO:0007169)                    | 2.47   | 7.96E-03 |
| energy coupled proton transport, down electrochemical gradient (GO:0015985)                      | 10.02  | 8.43E-03 |
| ATP synthesis coupled proton transport (GO:0015986)                                              | 10.02  | 8.45E-03 |
| TRIF-dependent toll-like receptor signaling pathway (GO:0035666)                                 | 10.02  | 8.47E-03 |
| modulation by symbiont of host cellular process (GO:0044068)                                     | 10.02  | 8.49E-03 |
| cellular response to nutrient levels (GO:0031669)                                                | 3.52   | 8.58E-03 |
| biosynthetic process (GO:0009058)                                                                | 1.37   | 8.73E-03 |
| calcium ion homeostasis (GO:0055074)                                                             | 2.64   | 8.92E-03 |
| mitochondrial ATP synthesis coupled electron transport (GO:0042775)                              | 5.11   | 9.30E-03 |
| positive regulation of interleukin-10 production (GO:0032733)                                    | 9.69   | 9.58E-03 |
| positive regulation of interleukin-2 production (GO:0032743)                                     | 9.69   | 9.60E-03 |
| regulation of lymphocyte proliferation (GO:0050670)                                              | 3.47   | 9.64E-03 |
| cellular protein catabolic process (GO:0044257)                                                  | 2.31   | 9.64E-03 |
| negative regulation of G2/M transition of mitotic cell cycle (GO:0010972)                        | 5.05   | 9.80E-03 |
| response to organic cyclic compound (GO:0014070)                                                 | 2.05   | 9.81E-03 |
| ATP synthesis coupled electron transport (GO:0042773)                                            | 5.05   | 9.82E-03 |
| regulation of production of molecular mediator of immune response (GO:0002700)                   | 4.47   | 9.83E-03 |
| positive regulation of protein modification by small protein conjugation or removal (GO:1903322) | 3.45   | 9.91E-03 |
| regulation of mononuclear cell proliferation (GO:0032944)                                        | 3.45   | 9.93E-03 |
| regulation of multicellular organismal development (GO:2000026)                                  | 1.67   | 1.01E-02 |
| negative regulation of interleukin-12 production (GO:0032695)                                    | 14.53  | 1.02E-02 |

|                                                                                                                           |        |          |
|---------------------------------------------------------------------------------------------------------------------------|--------|----------|
| cellular macromolecular complex assembly (GO:0034622)                                                                     | 2.07   | 1.02E-02 |
| response to cold (GO:0009409)                                                                                             | 7.12   | 1.04E-02 |
| gene expression (GO:0010467)                                                                                              | 1.43   | 1.04E-02 |
| detection of chemical stimulus (GO:0009593)                                                                               | < 0.01 | 1.04E-02 |
| regulation of protein insertion into mitochondrial membrane involved in apoptotic signaling pathway (GO:1900739)          | 9.38   | 1.05E-02 |
| intrinsic apoptotic signaling pathway in response to endoplasmic reticulum stress (GO:0070059)                            | 9.38   | 1.05E-02 |
| cristae formation (GO:0042407)                                                                                            | 9.38   | 1.05E-02 |
| regulation of mitochondrial outer membrane permeabilization involved in apoptotic signaling pathway (GO:1901028)          | 7.12   | 1.05E-02 |
| ATP hydrolysis coupled ion transmembrane transport (GO:0099131)                                                           | 5.81   | 1.05E-02 |
| cellular divalent inorganic cation homeostasis (GO:0072503)                                                               | 2.6    | 1.05E-02 |
| positive regulation of protein insertion into mitochondrial membrane involved in apoptotic signaling pathway (GO:1900740) | 9.38   | 1.06E-02 |
| cellular response to unfolded protein (GO:0034620)                                                                        | 4.4    | 1.06E-02 |
| protein complex assembly (GO:0006461)                                                                                     | 1.89   | 1.09E-02 |
| modification-dependent protein catabolic process (GO:0019941)                                                             | 2.46   | 1.10E-02 |
| protein complex biogenesis (GO:0070271)                                                                                   | 1.89   | 1.10E-02 |
| catabolic process (GO:0009056)                                                                                            | 1.64   | 1.10E-02 |
| animal organ development (GO:0048513)                                                                                     | 1.5    | 1.10E-02 |
| positive regulation of protein secretion (GO:0050714)                                                                     | 3.19   | 1.12E-02 |
| modulation of programmed cell death in other organism (GO:0044531)                                                        | 29.06  | 1.16E-02 |
| modulation by symbiont of host programmed cell death (GO:0052040)                                                         | 29.06  | 1.16E-02 |
| modulation by organism of apoptotic process in other organism involved in symbiotic interaction (GO:0052433)              | 29.06  | 1.17E-02 |
| modulation of programmed cell death in other organism involved in symbiotic interaction (GO:0052248)                      | 29.06  | 1.17E-02 |
| modulation of apoptotic process in other organism (GO:0044532)                                                            | 29.06  | 1.17E-02 |
| positive regulation of kinase activity (GO:0033674)                                                                       | 2.32   | 1.18E-02 |
| regulation of inclusion body assembly (GO:0090083)                                                                        | 13.68  | 1.19E-02 |
| response to purine-containing compound (GO:0014074)                                                                       | 3.9    | 1.19E-02 |
| regulation of transporter activity (GO:0032409)                                                                           | 3.16   | 1.19E-02 |
| modification-dependent macromolecule catabolic process (GO:0043632)                                                       | 2.41   | 1.19E-02 |
| positive regulation of phosphorylation (GO:0042327)                                                                       | 1.95   | 1.19E-02 |
| organic substance biosynthetic process (GO:1901576)                                                                       | 1.36   | 1.19E-02 |
| regulation of interleukin-2 production (GO:0032663)                                                                       | 6.84   | 1.20E-02 |
| SCF-dependent proteasomal ubiquitin-dependent protein catabolic process (GO:0031146)                                      | 5.57   | 1.25E-02 |
| placenta development (GO:0001890)                                                                                         | 3.88   | 1.25E-02 |
| positive regulation of protein catabolic process (GO:0045732)                                                             | 2.98   | 1.25E-02 |

|                                                                                                |        |          |
|------------------------------------------------------------------------------------------------|--------|----------|
| regulation of leukocyte proliferation (GO:0070663)                                             | 3.32   | 1.28E-02 |
| regulation of lymphocyte differentiation (GO:0045619)                                          | 3.85   | 1.30E-02 |
| regulation of secretion by cell (GO:1903530)                                                   | 2.17   | 1.30E-02 |
| I-kappaB kinase/NF-kappaB signaling (GO:0007249)                                               | 5.5    | 1.34E-02 |
| response to superoxide (GO:0000303)                                                            | 12.92  | 1.39E-02 |
| detection of chemical stimulus involved in sensory perception (GO:0050907)                     | < 0.01 | 1.39E-02 |
| regulation of ubiquitin-protein transferase activity (GO:0051438)                              | 4.19   | 1.40E-02 |
| positive regulation of DNA binding transcription factor activity (GO:0051091)                  | 3.1    | 1.40E-02 |
| purine ribonucleoside triphosphate biosynthetic process (GO:0009206)                           | 6.58   | 1.41E-02 |
| myeloid leukocyte differentiation (GO:0002573)                                                 | 4.7    | 1.41E-02 |
| positive regulation of cell proliferation (GO:0008284)                                         | 2      | 1.41E-02 |
| regulation of response to endoplasmic reticulum stress (GO:1905897)                            | 5.43   | 1.42E-02 |
| hemopoiesis (GO:0030097)                                                                       | 2.35   | 1.42E-02 |
| cellular protein complex assembly (GO:0043623)                                                 | 2.5    | 1.46E-02 |
| oxidative phosphorylation (GO:0006119)                                                         | 4.65   | 1.48E-02 |
| mRNA metabolic process (GO:0016071)                                                            | 2.14   | 1.48E-02 |
| positive regulation of protein ubiquitination (GO:0031398)                                     | 3.47   | 1.50E-02 |
| T cell costimulation (GO:0031295)                                                              | 5.35   | 1.51E-02 |
| regulation of mitochondrial membrane permeability (GO:0046902)                                 | 5.35   | 1.51E-02 |
| negative regulation of T-helper 1 type immune response (GO:0002826)                            | 24.91  | 1.52E-02 |
| purine nucleoside triphosphate biosynthetic process (GO:0009145)                               | 6.46   | 1.52E-02 |
| cellular response to hyperoxia (GO:0071455)                                                    | 24.91  | 1.53E-02 |
| interleukin-4 production (GO:0032633)                                                          | 24.91  | 1.53E-02 |
| membrane fusion involved in viral entry into host cell (GO:0039663)                            | 24.91  | 1.53E-02 |
| fusion of virus membrane with host plasma membrane (GO:0019064)                                | 24.91  | 1.54E-02 |
| multi-organism membrane fusion (GO:0044800)                                                    | 24.91  | 1.54E-02 |
| lymphocyte costimulation (GO:0031294)                                                          | 5.28   | 1.60E-02 |
| positive regulation of proteolysis involved in cellular protein catabolic process (GO:1903052) | 3.44   | 1.60E-02 |
| lymphocyte differentiation (GO:0030098)                                                        | 3.21   | 1.60E-02 |
| divalent inorganic cation homeostasis (GO:0072507)                                             | 2.47   | 1.62E-02 |
| regulation of cytosolic calcium ion concentration (GO:0051480)                                 | 2.87   | 1.70E-02 |
| T cell selection (GO:0045058)                                                                  | 8.07   | 1.75E-02 |
| regulation of protein localization to membrane (GO:1905475)                                    | 3.66   | 1.79E-02 |
| regulation of mRNA stability (GO:0043488)                                                      | 3.66   | 1.79E-02 |
| entry into host cell (GO:0030260)                                                              | 4.47   | 1.80E-02 |
| reactive oxygen species metabolic process (GO:0072593)                                         | 4.47   | 1.80E-02 |
| positive regulation of lymphocyte proliferation (GO:0050671)                                   | 3.99   | 1.80E-02 |

|                                                                                                |        |          |
|------------------------------------------------------------------------------------------------|--------|----------|
| negative regulation of cellular biosynthetic process (GO:0031327)                              | 1.71   | 1.80E-02 |
| entry into other organism involved in symbiotic interaction (GO:0051828)                       | 4.47   | 1.81E-02 |
| entry into cell of other organism involved in symbiotic interaction (GO:0051806)               | 4.47   | 1.81E-02 |
| entry into host (GO:0044409)                                                                   | 4.47   | 1.81E-02 |
| regulation of hematopoietic stem cell differentiation (GO:1902036)                             | 5.15   | 1.82E-02 |
| negative regulation of cell cycle G2/M phase transition (GO:1902750)                           | 4.47   | 1.82E-02 |
| small molecule metabolic process (GO:0044281)                                                  | 1.63   | 1.83E-02 |
| positive regulation of mononuclear cell proliferation (GO:0032946)                             | 3.96   | 1.89E-02 |
| sensory perception of smell (GO:0007608)                                                       | < 0.01 | 1.95E-02 |
| regulation of secretion (GO:0051046)                                                           | 2.08   | 1.96E-02 |
| multi-organism membrane organization (GO:0044803)                                              | 21.8   | 1.99E-02 |
| cellular response to cold (GO:0070417)                                                         | 21.8   | 1.99E-02 |
| negative regulation of proteolysis involved in cellular protein catabolic process (GO:1903051) | 6.01   | 2.03E-02 |
| IRE1-mediated unfolded protein response (GO:0036498)                                           | 6.01   | 2.03E-02 |
| erythrocyte homeostasis (GO:0034101)                                                           | 5.02   | 2.03E-02 |
| regulation of cellular amine metabolic process (GO:0033238)                                    | 5.02   | 2.03E-02 |
| positive regulation of protein phosphorylation (GO:0001934)                                    | 1.93   | 2.05E-02 |
| response to oxygen radical (GO:0000305)                                                        | 11.07  | 2.09E-02 |
| negative regulation of cell killing (GO:0031342)                                               | 11.07  | 2.09E-02 |
| positive regulation of macrophage activation (GO:0043032)                                      | 11.07  | 2.09E-02 |
| regulation of macrophage activation (GO:0043030)                                               | 7.65   | 2.09E-02 |
| negative regulation of peptidase activity (GO:0010466)                                         | 2.93   | 2.09E-02 |
| negative regulation of immune system process (GO:0002683)                                      | 2.48   | 2.09E-02 |
| regulation of interleukin-5 production (GO:0032674)                                            | 11.07  | 2.10E-02 |
| ribonucleoside triphosphate biosynthetic process (GO:0009201)                                  | 5.91   | 2.17E-02 |
| regulation of tumor necrosis factor-mediated signaling pathway (GO:0010803)                    | 5.91   | 2.17E-02 |
| cellular response to extracellular stimulus (GO:0031668)                                       | 3.07   | 2.19E-02 |
| cellular response to topologically incorrect protein (GO:0035967)                              | 3.85   | 2.23E-02 |
| negative regulation of adaptive immune response (GO:0002820)                                   | 7.45   | 2.29E-02 |
| positive regulation of hemopoiesis (GO:1903708)                                                | 3.5    | 2.31E-02 |
| response to external stimulus (GO:0009605)                                                     | 1.6    | 2.31E-02 |
| positive regulation of leukocyte proliferation (GO:0070665)                                    | 3.82   | 2.33E-02 |
| regulation of cytokine-mediated signaling pathway (GO:0001959)                                 | 3.48   | 2.38E-02 |
| regulation of RNA stability (GO:0043487)                                                       | 3.48   | 2.38E-02 |
| regulation of membrane permeability (GO:0090559)                                               | 4.84   | 2.39E-02 |
| regulation of protein complex assembly (GO:0043254)                                            | 2.45   | 2.39E-02 |
| positive regulation of protein kinase activity (GO:0045860)                                    | 2.27   | 2.39E-02 |

|                                                                                                                           |        |          |
|---------------------------------------------------------------------------------------------------------------------------|--------|----------|
| positive regulation of protein complex assembly (GO:0031334)                                                              | 3.03   | 2.40E-02 |
| regulation of nucleotide-binding oligomerization domain containing signaling pathway (GO:0070424)                         | 19.38  | 2.49E-02 |
| negative regulation of lipid localization (GO:1905953)                                                                    | 7.27   | 2.49E-02 |
| positive regulation of mitochondrial outer membrane permeabilization involved in apoptotic signaling pathway (GO:1901030) | 7.27   | 2.49E-02 |
| regulation of sequestering of calcium ion (GO:0051282)                                                                    | 4.19   | 2.50E-02 |
| negative regulation of protein catabolic process (GO:0042177)                                                             | 4.19   | 2.50E-02 |
| negative regulation of multicellular organismal process (GO:0051241)                                                      | 1.84   | 2.50E-02 |
| organic cyclic compound metabolic process (GO:1901360)                                                                    | 1.33   | 2.50E-02 |
| respiratory electron transport chain (GO:0022904)                                                                         | 4.15   | 2.63E-02 |
| response to lipid (GO:0033993)                                                                                            | 1.95   | 2.65E-02 |
| regulation of immune effector process (GO:0002697)                                                                        | 2.42   | 2.66E-02 |
| detection of chemical stimulus involved in sensory perception of smell (GO:0050911)                                       | < 0.01 | 2.66E-02 |
| multi-organism cellular process (GO:0044764)                                                                              | 10.11  | 2.70E-02 |
| ATP biosynthetic process (GO:0006754)                                                                                     | 7.09   | 2.71E-02 |
| purine-containing compound biosynthetic process (GO:0072522)                                                              | 3.71   | 2.72E-02 |
| regulation of cytokine secretion (GO:0050707)                                                                             | 3.4    | 2.74E-02 |
| protein catabolic process (GO:0030163)                                                                                    | 2.1    | 2.74E-02 |
| regulation of calcium ion transmembrane transporter activity (GO:1901019)                                                 | 4.68   | 2.79E-02 |
| positive regulation of cellular protein catabolic process (GO:1903364)                                                    | 3.15   | 2.82E-02 |
| developmental process (GO:0032502)                                                                                        | 1.3    | 2.84E-02 |
| cation transport (GO:0006812)                                                                                             | 1.93   | 2.85E-02 |
| positive regulation of cytokine secretion (GO:0050715)                                                                    | 4.08   | 2.86E-02 |
| heart development (GO:0007507)                                                                                            | 2.3    | 2.86E-02 |
| regulation of T cell differentiation in thymus (GO:0033081)                                                               | 9.69   | 3.04E-02 |
| regulation of establishment or maintenance of cell polarity (GO:0032878)                                                  | 9.69   | 3.05E-02 |
| response to peptide hormone (GO:0043434)                                                                                  | 2.45   | 3.09E-02 |
| regulation of response to cytokine stimulus (GO:0060759)                                                                  | 3.32   | 3.18E-02 |
| intracellular receptor signaling pathway (GO:0030522)                                                                     | 3.3    | 3.30E-02 |
| positive regulation of multi-organism process (GO:0043902)                                                                | 3.3    | 3.31E-02 |
| cellular response to organonitrogen compound (GO:0071417)                                                                 | 2.25   | 3.37E-02 |
| regulation of endoplasmic reticulum unfolded protein response (GO:1900101)                                                | 9.3    | 3.45E-02 |
| positive regulation of protein serine/threonine kinase activity (GO:0071902)                                              | 2.51   | 3.45E-02 |
| modification by symbiont of host morphology or physiology (GO:0044003)                                                    | 6.61   | 3.50E-02 |
| system development (GO:0048731)                                                                                           | 1.35   | 3.57E-02 |

|                                                                                                                                                      |       |          |
|------------------------------------------------------------------------------------------------------------------------------------------------------|-------|----------|
| regulation of binding (GO:0051098)                                                                                                                   | 2.5   | 3.63E-02 |
| viral entry into host cell (GO:0046718)                                                                                                              | 4.42  | 3.67E-02 |
| extrinsic apoptotic signaling pathway (GO:0097191)                                                                                                   | 4.42  | 3.67E-02 |
| type 2 immune response (GO:0042092)                                                                                                                  | 15.85 | 3.78E-02 |
| negative regulation of inclusion body assembly (GO:0090084)                                                                                          | 15.85 | 3.79E-02 |
| regulation of mRNA catabolic process (GO:0061013)                                                                                                    | 3.23  | 3.80E-02 |
| positive regulation of cytosolic calcium ion concentration (GO:0007204)                                                                              | 2.82  | 4.00E-02 |
| negative regulation of endopeptidase activity (GO:0010951)                                                                                           | 2.82  | 4.00E-02 |
| positive regulation of MAPK cascade (GO:0043410)                                                                                                     | 2.2   | 4.05E-02 |
| regulation of pancreatic stellate cell proliferation (GO:2000229)                                                                                    | 58.13 | 4.13E-02 |
| negative regulation of dendritic cell cytokine production (GO:0002731)                                                                               | 58.13 | 4.13E-02 |
| regulation of cell cycle (GO:0051726)                                                                                                                | 1.75  | 4.13E-02 |
| regulation of adaptive immune response based on somatic recombination of immune receptors built from immunoglobulin superfamily domains (GO:0002822) | 3.81  | 4.14E-02 |
| negative regulation of cellular protein catabolic process (GO:1903363)                                                                               | 5.05  | 4.15E-02 |
| regulation of cell killing (GO:0031341)                                                                                                              | 5.05  | 4.16E-02 |
| inflammatory response (GO:0006954)                                                                                                                   | 2.26  | 4.22E-02 |
| response to drug (GO:0042493)                                                                                                                        | 1.85  | 4.25E-02 |
| ATP hydrolysis coupled proton transport (GO:0015991)                                                                                                 | 8.61  | 4.30E-02 |
| nucleoside triphosphate biosynthetic process (GO:0009142)                                                                                            | 4.98  | 4.42E-02 |
| sensory perception (GO:0007600)                                                                                                                      | 0.31  | 4.48E-02 |
| protein localization to nucleus (GO:0034504)                                                                                                         | 3.14  | 4.50E-02 |
| chaperone cofactor-dependent protein refolding (GO:0051085)                                                                                          | 14.53 | 4.53E-02 |
| negative regulation of transcription from RNA polymerase II promoter in response to stress (GO:0097201)                                              | 14.53 | 4.53E-02 |
| positive regulation of chemokine secretion (GO:0090197)                                                                                              | 14.53 | 4.54E-02 |
| positive regulation of secretion by cell (GO:1903532)                                                                                                | 2.43  | 4.54E-02 |
| negative regulation of hydrolase activity (GO:0051346)                                                                                               | 2.35  | 4.54E-02 |
| multicellular organism development (GO:0007275)                                                                                                      | 1.32  | 4.57E-02 |
| ribonucleoprotein complex biogenesis (GO:0022613)                                                                                                    | 2.24  | 4.60E-02 |
| positive regulation of cell differentiation (GO:0045597)                                                                                             | 1.89  | 4.60E-02 |
| positive regulation of T cell differentiation (GO:0045582)                                                                                           | 4.91  | 4.64E-02 |
| energy coupled proton transmembrane transport, against electrochemical gradient (GO:0015988)                                                         | 8.3   | 4.74E-02 |
| negative regulation of proteasomal ubiquitin-dependent protein catabolic process (GO:0032435)                                                        | 8.3   | 4.75E-02 |
| regulation of interleukin-4 production (GO:0032673)                                                                                                  | 8.3   | 4.76E-02 |
| regulation of ion transmembrane transporter activity (GO:0032412)                                                                                    | 2.91  | 4.79E-02 |
| regulation of intrinsic apoptotic signaling pathway (GO:2001242)                                                                                     | 3.35  | 4.83E-02 |

|                                                                                                      |      |          |
|------------------------------------------------------------------------------------------------------|------|----------|
| T cell differentiation (GO:0030217)                                                                  | 3.69 | 4.84E-02 |
| negative regulation of ubiquitin-protein ligase activity involved in mitotic cell cycle (GO:0051436) | 4.84 | 4.90E-02 |
| cell redox homeostasis (GO:0045454)                                                                  | 4.84 | 4.91E-02 |

**Table S10. The cohort of 865 genes correlating with tissue eosinophilia (disease severity marker)**

| <b>Gene Symbol</b>                                  | <b>P values</b> |
|-----------------------------------------------------|-----------------|
| <i>PTGDR2</i>                                       | 2.62E-05        |
| <i>SNORD127</i>                                     | 0.00015         |
| <i>AB231711</i>                                     | 0.000184        |
| <i>FLJ00050</i>                                     | 0.000202        |
| <i>FFAR3</i>                                        | 0.000259        |
| <i>DTX2P1-</i><br><i>UPK3BP1-</i><br><i>PMS2P11</i> | 0.000312        |
| <i>ASAH2B</i>                                       | 0.000342        |
| <i>BC127952</i>                                     | 0.000399        |
| <i>CHCHD10</i>                                      | 0.00047         |
| <i>IL17RB</i>                                       | 0.000508        |
| <i>SCXA</i>                                         | 0.000518        |
| <i>LINC00879</i>                                    | 0.00057         |
| <i>KIAA1524</i>                                     | 0.000581        |
| <i>GPR137C</i>                                      | 0.000595        |
| <i>ST3GAL5</i>                                      | 0.000639        |
| <i>LIF</i>                                          | 0.000722        |
| <i>RP11-345M22.2</i>                                | 0.000798        |
| <i>CES1P2</i>                                       | 0.000843        |
| <i>PTPRN2</i>                                       | 0.000987        |
| <i>ZNF710</i>                                       | 0.00104         |
| <i>TSEN54</i>                                       | 0.0011          |
| <i>RNF19A</i>                                       | 0.00113         |
| <i>SLC4A7</i>                                       | 0.00118         |
| <i>HPGDS</i>                                        | 0.00119         |
| <i>BC044611</i>                                     | 0.00119         |
| <i>TIGD5</i>                                        | 0.00121         |
| <i>TPSB2</i>                                        | 0.00122         |
| <i>AY190091</i>                                     | 0.00123         |
| <i>LOC100130705</i>                                 | 0.00131         |
| <i>CNIH2</i>                                        | 0.00132         |
| <i>DMD</i>                                          | 0.00137         |
| <i>CCDC64</i>                                       | 0.00138         |
| <i>TMEM132D</i>                                     | 0.00156         |
| <i>CLIP4</i>                                        | 0.00182         |
| <i>IL13</i>                                         | 0.00195         |
| <i>NBEAL2</i>                                       | 0.00217         |



|                      |         |
|----------------------|---------|
| <i>ZBTB24</i>        | 0.00218 |
| <i>INPPL1</i>        | 0.00225 |
| <i>CHPF</i>          | 0.00227 |
| <i>SSX4</i>          | 0.00231 |
| <i>SSX4B</i>         | 0.00231 |
| <i>SH3TC1</i>        | 0.00233 |
| <i>IRS2</i>          | 0.00235 |
| <i>U85052</i>        | 0.00237 |
| <i>SLC25A20</i>      | 0.00239 |
| <i>GOLGA8DP</i>      | 0.00242 |
| <i>MAP3K8</i>        | 0.00243 |
| <i>SOS1</i>          | 0.00251 |
| <i>IL5</i>           | 0.00259 |
| <i>LINC00623</i>     | 0.0026  |
| <i>PDE4A</i>         | 0.00262 |
| <i>TMEM44-AS1</i>    | 0.00264 |
| <i>SUCLG2</i>        | 0.00265 |
| <i>CES2</i>          | 0.00265 |
| <i>AFAP1</i>         | 0.00271 |
| <i>BC064371</i>      | 0.00277 |
| <i>INTS4L2</i>       | 0.00296 |
| <i>RIPK3</i>         | 0.00299 |
| <i>SH2D2A</i>        | 0.00302 |
| <i>CPNE3</i>         | 0.00306 |
| <i>RGCC</i>          | 0.00306 |
| <i>LINC00654</i>     | 0.00308 |
| <i>AK127124</i>      | 0.00316 |
| <i>AY124781</i>      | 0.00327 |
| <i>RNU5F-1</i>       | 0.00327 |
| <i>HES4</i>          | 0.00334 |
| <i>C2orf66</i>       | 0.00339 |
| <i>EGLN3</i>         | 0.00349 |
| <i>SLC35G5</i>       | 0.00349 |
| <i>CORO2B</i>        | 0.00363 |
| <i>VLDLR</i>         | 0.00384 |
| <i>CFLAR-AS1</i>     | 0.00384 |
| <i>RP11-345M22.1</i> | 0.00385 |
| <i>U39123</i>        | 0.00403 |
| <i>DUSP16</i>        | 0.0041  |
| <i>CDYL2</i>         | 0.00411 |
| <i>ENGASE</i>        | 0.00422 |

|                     |         |
|---------------------|---------|
| <i>CYP11A1</i>      | 0.00425 |
| <i>ASIC1</i>        | 0.00444 |
| <i>GPR89C</i>       | 0.00444 |
| <i>TMPO-AS1</i>     | 0.00445 |
| <i>AX747643</i>     | 0.00447 |
| <i>RND1</i>         | 0.00447 |
| <i>AY190112</i>     | 0.00464 |
| <i>ZBTB1</i>        | 0.00467 |
| <i>LRIF1</i>        | 0.00487 |
| <i>AK309215</i>     | 0.00491 |
| <i>UBXN10-AS1</i>   | 0.00501 |
| <i>CCDC177</i>      | 0.00507 |
| <i>FAM186A</i>      | 0.00513 |
| <i>SAMD5</i>        | 0.00516 |
| <i>ETV7</i>         | 0.00528 |
| <i>LOC100287534</i> | 0.00533 |
| <i>GPR34</i>        | 0.00533 |
| <i>GSTA4</i>        | 0.00539 |
| <i>ATAD2B</i>       | 0.00542 |
| <i>AKAP11</i>       | 0.0055  |
| <i>CASQ1</i>        | 0.00556 |
| <i>EGR4</i>         | 0.00562 |
| <i>TRPC3</i>        | 0.00576 |
| <i>P4HA2-AS1</i>    | 0.00576 |
| <i>AF387757</i>     | 0.00592 |
| <i>TM4SF18</i>      | 0.00599 |
| <i>PLN</i>          | 0.00607 |
| <i>SOCS1</i>        | 0.00608 |
| <i>BC034612</i>     | 0.00614 |
| <i>ADM5</i>         | 0.00616 |
| <i>PMCH</i>         | 0.00628 |
| <i>TTY16</i>        | 0.00629 |
| <i>GIPR</i>         | 0.0063  |
| <i>CSK</i>          | 0.00635 |
| <i>SMARCA5-AS1</i>  | 0.00652 |
| <i>ARC</i>          | 0.00667 |
| <i>MIR4651</i>      | 0.00669 |
| <i>SNCB</i>         | 0.00669 |
| <i>FAM84A</i>       | 0.00674 |
| <i>LRRC45</i>       | 0.00674 |
| <i>RP11-432I5.1</i> | 0.00675 |

|                     |         |
|---------------------|---------|
| <i>LENG1</i>        | 0.0068  |
| <i>LINC00858</i>    | 0.00682 |
| <i>GLRX</i>         | 0.00682 |
| <i>SLC48A1</i>      | 0.00685 |
| <i>ZNF700</i>       | 0.00693 |
| <i>YY1</i>          | 0.00707 |
| <i>AX747832</i>     | 0.00727 |
| <i>ERMN</i>         | 0.00729 |
| <i>GNB1L</i>        | 0.00733 |
| <i>AQP7P1</i>       | 0.00739 |
| <i>AF279783</i>     | 0.0074  |
| <i>TNRC6B</i>       | 0.00757 |
| <i>LMF2</i>         | 0.00773 |
| <i>MAFA</i>         | 0.00774 |
| <i>MFSD6</i>        | 0.00779 |
| <i>IL4</i>          | 0.00782 |
| <i>TRIM39</i>       | 0.0079  |
| <i>LOC100287632</i> | 0.00796 |
| <i>BZRAP1</i>       | 0.00803 |
| <i>MGAT5</i>        | 0.00806 |
| <i>RAB3A</i>        | 0.00815 |
| <i>PHKA2-AS1</i>    | 0.00818 |
| <i>FGFR1OP2</i>     | 0.00822 |
| <i>ZMAT2</i>        | 0.00855 |
| <i>RNU6-69P</i>     | 0.00857 |
| <i>CXorf65</i>      | 0.00867 |
| <i>TCRBV18S1</i>    | 0.00868 |
| <i>BC016831</i>     | 0.00869 |
| <i>SLC7A4</i>       | 0.00871 |
| <i>CYSLTR1</i>      | 0.00872 |
| <i>EHMT1</i>        | 0.00878 |
| <i>KAT6B</i>        | 0.0089  |
| <i>TIGIT</i>        | 0.00902 |
| <i>C20orf197</i>    | 0.00905 |
| <i>CACNA1D</i>      | 0.00905 |
| <i>FAM222A</i>      | 0.00927 |
| <i>FAM50A</i>       | 0.0093  |
| <i>UBL3</i>         | 0.00936 |
| <i>AX748049</i>     | 0.00939 |
| <i>DHH</i>          | 0.00939 |
| <i>TAF9B</i>        | 0.00943 |

|                      |         |
|----------------------|---------|
| <i>CMTR1</i>         | 0.00944 |
| <i>GC</i>            | 0.00948 |
| <i>FOXI2</i>         | 0.00949 |
| <i>ZNF727P</i>       | 0.00957 |
| <i>F10</i>           | 0.00973 |
| <i>SIRT6</i>         | 0.0098  |
| <i>POLG</i>          | 0.00982 |
| <i>MOSPD1</i>        | 0.00987 |
| <i>CPLX2</i>         | 0.00988 |
| <i>SERF1B</i>        | 0.00989 |
| <i>GQ502877</i>      | 0.00991 |
| <i>TCRBV20S1A1N2</i> | 0.00993 |
| <i>DBNL</i>          | 0.0102  |
| <i>INVS</i>          | 0.0102  |
| <i>CBX6</i>          | 0.0103  |
| <i>TMEM160</i>       | 0.0104  |
| <i>C10orf128</i>     | 0.0104  |
| <i>SLC35F2</i>       | 0.0104  |
| <i>LRRC37A5P</i>     | 0.0104  |
| <i>TANK</i>          | 0.0105  |
| <i>PET112</i>        | 0.0105  |
| <i>ZC2HC1A</i>       | 0.0105  |
| <i>FOLR2</i>         | 0.0106  |
| <i>MARCH9</i>        | 0.0106  |
| <i>ARL2</i>          | 0.0106  |
| <i>GABPB1-AS1</i>    | 0.0107  |
| <i>AVL9</i>          | 0.0107  |
| <i>TARSL2</i>        | 0.0108  |
| <i>FLII</i>          | 0.0108  |
| <i>TAAR2</i>         | 0.0109  |
| <i>OR5B2</i>         | 0.0109  |
| <i>MEF2B</i>         | 0.0109  |
| <i>APOOP5</i>        | 0.0109  |
| <i>MIR4525</i>       | 0.0109  |
| <i>LOC154872</i>     | 0.0109  |
| <i>DQ600137</i>      | 0.0109  |
| <i>DQ577902</i>      | 0.0109  |
| <i>DQ583079</i>      | 0.0109  |
| <i>MIR548BA</i>      | 0.0109  |
| <i>DQ600007</i>      | 0.0109  |
| <i>CCL1</i>          | 0.0109  |

|                    |        |
|--------------------|--------|
| <i>MIR599</i>      | 0.0109 |
| <i>DQ583128</i>    | 0.0109 |
| <i>EPO</i>         | 0.0109 |
| <i>MIR1910</i>     | 0.0109 |
| <i>DQ572076</i>    | 0.0109 |
| <i>CLPSL1</i>      | 0.0109 |
| <i>GDNF-AS1</i>    | 0.0109 |
| <i>DQ578365</i>    | 0.0109 |
| <i>DQ573937</i>    | 0.0109 |
| <i>IGCH</i>        | 0.0109 |
| <i>LINC00693</i>   | 0.0109 |
| <i>TAS1R2</i>      | 0.0109 |
| <i>BC015688</i>    | 0.0109 |
| <i>MIR4443</i>     | 0.0109 |
| <i>DQ578350</i>    | 0.0109 |
| <i>TDRG1</i>       | 0.0109 |
| <i>MIR6805</i>     | 0.0109 |
| <i>AB305865</i>    | 0.0109 |
| <i>DQ591177</i>    | 0.0109 |
| <i>RNU6-57P</i>    | 0.0109 |
| <i>MIR3917</i>     | 0.0109 |
| <i>MIR3618</i>     | 0.0109 |
| <i>CALML6</i>      | 0.0109 |
| <i>GS1-600G8.3</i> | 0.0109 |
| <i>MIR4660</i>     | 0.0109 |
| <i>LINC00162</i>   | 0.0109 |
| <i>MIR875</i>      | 0.0109 |
| <i>DQ592197</i>    | 0.0109 |
| <i>SLCO6A1</i>     | 0.0109 |
| <i>DQ583414</i>    | 0.0109 |
| <i>SYT16</i>       | 0.0109 |
| <i>LINC00545</i>   | 0.0109 |
| <i>PABPC1L2B</i>   | 0.0109 |
| <i>MIR5696</i>     | 0.0109 |
| <i>FOXF2</i>       | 0.0109 |
| <i>DQ592332</i>    | 0.0109 |
| <i>MIR6809</i>     | 0.0109 |
| <i>HP08874</i>     | 0.0109 |
| <i>DQ571132</i>    | 0.0109 |
| <i>MIR3661</i>     | 0.0109 |
| <i>AB305752</i>    | 0.0109 |

|                       |        |
|-----------------------|--------|
| <i>WWC2-AS2</i>       | 0.0109 |
| <i>BC171868</i>       | 0.0109 |
| <i>KRTAP13-2</i>      | 0.0109 |
| <i>DQ570150</i>       | 0.0109 |
| <i>PGBD5</i>          | 0.0109 |
| <i>SMIM21</i>         | 0.0109 |
| <i>MIR4439</i>        | 0.0109 |
| <i>METTL11B</i>       | 0.0109 |
| <i>DQ583165</i>       | 0.0109 |
| <i>KCNK13</i>         | 0.0109 |
| <i>MIR2115</i>        | 0.0109 |
| <i>HOXB1</i>          | 0.0109 |
| <i>OR1N1</i>          | 0.0109 |
| <i>PROP1</i>          | 0.0109 |
| <i>DQ596147</i>       | 0.0109 |
| <i>SMEK3P</i>         | 0.0109 |
| <i>CHRNA4</i>         | 0.0109 |
| <i>PRR5L</i>          | 0.0109 |
| <i>BC062469</i>       | 0.0113 |
| <i>KRT77</i>          | 0.0118 |
| <i>IMPDH1</i>         | 0.0118 |
| <i>SNORD11B</i>       | 0.0118 |
| <i>BC062350</i>       | 0.012  |
| <i>ADHFE1</i>         | 0.0122 |
| <i>CBR3</i>           | 0.0125 |
| <i>PGAP1</i>          | 0.0126 |
| <i>MGARP</i>          | 0.0126 |
| <i>FAM78B</i>         | 0.0126 |
| <i>RORA</i>           | 0.0127 |
| <i>TM6SF2</i>         | 0.0128 |
| <i>C9orf129</i>       | 0.013  |
| <i>HIC2</i>           | 0.013  |
| <i>ACSL4</i>          | 0.0131 |
| <i>TCRBV10S1P</i>     | 0.0131 |
| <i>HINT2</i>          | 0.0131 |
| <i>DQ593458</i>       | 0.0131 |
| <i>CHPF2</i>          | 0.0131 |
| <i>SEC31B</i>         | 0.0133 |
| <i>GPR152</i>         | 0.0133 |
| <i>Ig+kappa</i>       | 0.0134 |
| <i>DKFZp686O16217</i> | 0.0135 |

|                     |        |
|---------------------|--------|
| <i>SYDE1</i>        | 0.0135 |
| <i>NRARP</i>        | 0.0136 |
| <i>MARCH1</i>       | 0.0137 |
| <i>STK39</i>        | 0.0137 |
| <i>MCF2</i>         | 0.0138 |
| <i>G3BP1</i>        | 0.0138 |
| <i>ANKUB1</i>       | 0.014  |
| <i>BCL7C</i>        | 0.0141 |
| <i>TCTN3</i>        | 0.0141 |
| <i>LINC00477</i>    | 0.0141 |
| <i>GRM5-AS1</i>     | 0.0142 |
| <i>ZDHHC17</i>      | 0.0142 |
| <i>CDKN1B</i>       | 0.0142 |
| <i>PPP1R10</i>      | 0.0142 |
| <i>U80770</i>       | 0.0143 |
| <i>MORC2-AS1</i>    | 0.0144 |
| <i>APITD1-CORT</i>  | 0.0144 |
| <i>LOC646214</i>    | 0.0144 |
| <i>SETSIP</i>       | 0.0145 |
| <i>ENTPD4</i>       | 0.0146 |
| <i>NOX4</i>         | 0.0147 |
| <i>AK128525</i>     | 0.0147 |
| <i>CT45A2</i>       | 0.0147 |
| <i>F2</i>           | 0.0147 |
| <i>IRF4</i>         | 0.0148 |
| <i>ELOVL2</i>       | 0.0148 |
| <i>AK299452</i>     | 0.0148 |
| <i>SLC22A16</i>     | 0.0149 |
| <i>BC041646</i>     | 0.015  |
| <i>GALR2</i>        | 0.015  |
| <i>LOC100130238</i> | 0.0152 |
| <i>ARHGEF25</i>     | 0.0152 |
| <i>FSTL4</i>        | 0.0153 |
| <i>SARNP</i>        | 0.0155 |
| <i>FOXN3-AS2</i>    | 0.0156 |
| <i>GCM2</i>         | 0.0157 |
| <i>TNNI2</i>        | 0.0158 |
| <i>HPN-AS1</i>      | 0.0158 |
| <i>OR1A1</i>        | 0.0158 |
| <i>CALN1</i>        | 0.0159 |
| <i>HVCN1</i>        | 0.0159 |

|                         |        |
|-------------------------|--------|
| <i>CDHR2</i>            | 0.016  |
| <i>RP11-779O18.1</i>    | 0.016  |
| <i>USP8</i>             | 0.0161 |
| <i>SKINTL</i>           | 0.0161 |
| <i>RP5-1033H22.2</i>    | 0.0161 |
| <i>C20orf78</i>         | 0.0161 |
| <i>LOC400940</i>        | 0.0161 |
| <i>GLYATL3</i>          | 0.0161 |
| <i>ASB2</i>             | 0.0162 |
| <i>LPIN1</i>            | 0.0163 |
| <i>USP51</i>            | 0.0163 |
| <i>STAG1</i>            | 0.0163 |
| <i>MDFI</i>             | 0.0164 |
| <i>AC093627.10</i>      | 0.0164 |
| <i>MIR761</i>           | 0.0164 |
| <i>KCNK5</i>            | 0.0164 |
| <i>SORBS3</i>           | 0.0165 |
| <i>MIR6895</i>          | 0.0165 |
| <i>SCARNA17</i>         | 0.0165 |
| <i>FAM181A</i>          | 0.0165 |
| <i>SRCRB4D</i>          | 0.0165 |
| <i>NFKBIZ</i>           | 0.0166 |
| <i>MIR3124</i>          | 0.0166 |
| <i>IGSF23</i>           | 0.0166 |
| <i>GQ502900</i>         | 0.0166 |
| <i>TTY7B</i>            | 0.0166 |
| <i>AK055055</i>         | 0.0167 |
| <i>BC041947</i>         | 0.0167 |
| <i>CCL17</i>            | 0.017  |
| <i>BC037384</i>         | 0.017  |
| <i>OR4S2</i>            | 0.0171 |
| <i>SHANK1</i>           | 0.0171 |
| <i>SMIM2-IT1</i>        | 0.0171 |
| <i>COL26A1</i>          | 0.0171 |
| <i>SSX9</i>             | 0.0171 |
| <i>LEMD2</i>            | 0.0172 |
| <i>RP3-377D14.1-001</i> | 0.0174 |
| <i>MIR6750</i>          | 0.0174 |
| <i>NT5C1A</i>           | 0.0174 |
| <i>BC050343</i>         | 0.0175 |



|                      |        |
|----------------------|--------|
| <i>RP13-507P19.2</i> | 0.0175 |
| <i>KRT10</i>         | 0.0175 |
| <i>SRSF11</i>        | 0.0176 |
| <i>DMRTC1B</i>       | 0.0176 |
| <i>DIRC3</i>         | 0.0177 |
| <i>CLTB</i>          | 0.0177 |
| <i>C14orf169</i>     | 0.0177 |
| <i>PPM1G</i>         | 0.0177 |
| <i>MIR933</i>        | 0.0177 |
| <i>AY927512</i>      | 0.0178 |
| <i>AK302306</i>      | 0.0178 |
| <i>ZBTB9</i>         | 0.0178 |
| <i>LINC00304</i>     | 0.0179 |
| <i>AK294825</i>      | 0.018  |
| <i>MISP</i>          | 0.0181 |
| <i>FKBP4</i>         | 0.0181 |
| <i>IQCF1</i>         | 0.0182 |
| <i>PRELID1</i>       | 0.0182 |
| <i>LCN10</i>         | 0.0182 |
| <i>DNAJA4</i>        | 0.0183 |
| <i>ZNF217</i>        | 0.0183 |
| <i>RORB</i>          | 0.0184 |
| <i>CCDC89</i>        | 0.0186 |
| <i>NUTM2A-AS1</i>    | 0.0186 |
| <i>BC034416</i>      | 0.0186 |
| <i>TANGO6</i>        | 0.0186 |
| <i>LMAN2</i>         | 0.0186 |
| <i>TIAM2</i>         | 0.0187 |
| <i>NSUN2</i>         | 0.0187 |
| <i>PLB1</i>          | 0.0188 |
| <i>GIPC1</i>         | 0.0189 |
| <i>MRPL41</i>        | 0.0189 |
| <i>ZCCHC2</i>        | 0.019  |
| <i>WASH3P</i>        | 0.019  |
| <i>PNLDC1</i>        | 0.0192 |
| <i>NUDT3</i>         | 0.0192 |
| <i>NGFR</i>          | 0.0192 |
| <i>PPARG</i>         | 0.0192 |
| <i>PGGT1B</i>        | 0.0192 |
| <i>RGS2</i>          | 0.0193 |
| <i>CARKD</i>         | 0.0193 |

|                      |        |
|----------------------|--------|
| <i>FAM71D</i>        | 0.0194 |
| <i>DL491012</i>      | 0.0195 |
| <i>SNX25</i>         | 0.0196 |
| <i>RNU4ATAC</i>      | 0.0198 |
| <i>TLL13</i>         | 0.0201 |
| <i>PDP1</i>          | 0.0201 |
| <i>SSSCA1-AS1</i>    | 0.0201 |
| <i>ZBTB22</i>        | 0.0202 |
| <i>RP11-752G15.3</i> | 0.0202 |
| <i>BRD1</i>          | 0.0202 |
| <i>EPX</i>           | 0.0203 |
| <i>FANCD2</i>        | 0.0204 |
| <i>ADORA1</i>        | 0.0206 |
| <i>X07060</i>        | 0.0207 |
| <i>GIMAP6</i>        | 0.0209 |
| <i>MIR548T</i>       | 0.0209 |
| <i>P4HA2</i>         | 0.021  |
| <i>RBMS1</i>         | 0.021  |
| <i>PLA2G15</i>       | 0.0211 |
| <i>C1orf173</i>      | 0.0211 |
| <i>ZNF17</i>         | 0.0211 |
| <i>SNTG2</i>         | 0.0212 |
| <i>C17orf64</i>      | 0.0213 |
| <i>OR4N2</i>         | 0.0213 |
| <i>IPO5</i>          | 0.0213 |
| <i>MANSC4</i>        | 0.0214 |
| <i>MIR7848</i>       | 0.0214 |
| <i>ZNF75D</i>        | 0.0214 |
| <i>ACAD11</i>        | 0.0216 |
| <i>CREB3L3</i>       | 0.0216 |
| <i>RP11-300J18.1</i> | 0.0216 |
| <i>SLC4A3</i>        | 0.0217 |
| <i>DMRTC1</i>        | 0.0217 |
| <i>SERP2</i>         | 0.0218 |
| <i>HSPA7</i>         | 0.0219 |
| <i>ERIC1-AS1</i>     | 0.022  |
| <i>GTF3C2</i>        | 0.022  |
| <i>NAGLU</i>         | 0.022  |
| <i>ARID4B</i>        | 0.0222 |
| <i>SDF4</i>          | 0.0222 |
| <i>MRPS6</i>         | 0.0222 |

|                  |        |
|------------------|--------|
| <i>PPCDC</i>     | 0.0222 |
| <i>C10orf76</i>  | 0.0224 |
| <i>MYADM</i>     | 0.0224 |
| <i>BCL2L11</i>   | 0.0224 |
| <i>RPUSD3</i>    | 0.0224 |
| <i>RBM47</i>     | 0.0225 |
| <i>AK095583</i>  | 0.0225 |
| <i>TTC31</i>     | 0.0227 |
| <i>RSRC1</i>     | 0.0227 |
| <i>HEXDC</i>     | 0.0227 |
| <i>BRF1</i>      | 0.0227 |
| <i>E10222</i>    | 0.0228 |
| <i>EVI2B</i>     | 0.0228 |
| <i>BTAF1</i>     | 0.0228 |
| <i>TMEM185A</i>  | 0.0228 |
| <i>C14orf164</i> | 0.0229 |
| <i>SEC22C</i>    | 0.0229 |
| <i>TCRBV13S1</i> | 0.0229 |
| <i>CD79A</i>     | 0.0229 |
| <i>PTPRD</i>     | 0.023  |
| <i>NPY4R</i>     | 0.0231 |
| <i>NFATC2</i>    | 0.0231 |
| <i>GIMAP2</i>    | 0.0231 |
| <i>C9orf142</i>  | 0.0231 |
| <i>C2orf81</i>   | 0.0232 |
| <i>HIC1</i>      | 0.0232 |
| <i>BAG3</i>      | 0.0232 |
| <i>PPP6R2</i>    | 0.0233 |
| <i>SLC22A18</i>  | 0.0236 |
| <i>FLJ31104</i>  | 0.0237 |
| <i>LSM11</i>     | 0.0237 |
| <i>ZNF444</i>    | 0.0239 |
| <i>PSPH</i>      | 0.0241 |
| <i>GDPGP1</i>    | 0.0241 |
| <i>FAM110B</i>   | 0.0241 |
| <i>TUBGCP4</i>   | 0.0242 |
| <i>TRIM34</i>    | 0.0243 |
| <i>NPAP1</i>     | 0.0243 |
| <i>AB231702</i>  | 0.0243 |
| <i>GSG2</i>      | 0.0244 |
| <i>DFFA</i>      | 0.0244 |

|                  |        |
|------------------|--------|
| <i>DUSP4</i>     | 0.0246 |
| <i>HS3ST1</i>    | 0.0246 |
| <i>CDCP2</i>     | 0.0247 |
| <i>RASSF5</i>    | 0.0247 |
| <i>FAM138E</i>   | 0.0248 |
| <i>FLJ44313</i>  | 0.0248 |
| <i>AK097437</i>  | 0.0249 |
| <i>EHBP1L1</i>   | 0.0251 |
| <i>ABCC9</i>     | 0.0251 |
| <i>CLYBL-AS2</i> | 0.0251 |
| <i>TPT1-AS1</i>  | 0.0252 |
| <i>SMG1</i>      | 0.0252 |
| <i>CCDC86</i>    | 0.0253 |
| <i>TGS1</i>      | 0.0253 |
| <i>ABCD2</i>     | 0.0253 |
| <i>SACS</i>      | 0.0253 |
| <i>ACLY</i>      | 0.0253 |
| <i>MIR3140</i>   | 0.0254 |
| <i>RNVU1-3</i>   | 0.0254 |
| <i>ZNF532</i>    | 0.0254 |
| <i>FAM195A</i>   | 0.0254 |
| <i>GGT2</i>      | 0.0255 |
| <i>ICOS</i>      | 0.0257 |
| <i>DNAJC17</i>   | 0.0257 |
| <i>RNU6-63P</i>  | 0.0258 |
| <i>CIDEB</i>     | 0.0259 |
| <i>CDR2</i>      | 0.0259 |
| <i>DQ573434</i>  | 0.0259 |
| <i>GGT6</i>      | 0.026  |
| <i>METTL4</i>    | 0.0261 |
| <i>DQ589229</i>  | 0.0262 |
| <i>MIR320D1</i>  | 0.0262 |
| <i>PPP1CC</i>    | 0.0263 |
| <i>THEGL</i>     | 0.0263 |
| <i>RNF39</i>     | 0.0263 |
| <i>SALL2</i>     | 0.0263 |
| <i>PPIAL4F</i>   | 0.0264 |
| <i>RHOA</i>      | 0.0265 |
| <i>CCDC81</i>    | 0.0266 |
| <i>SCNM1</i>     | 0.0266 |
| <i>OIP5-AS1</i>  | 0.0267 |

|                    |        |
|--------------------|--------|
| <i>C16orf3</i>     | 0.0267 |
| <i>CR936711</i>    | 0.0267 |
| <i>ABCC8</i>       | 0.0268 |
| <i>AK024119</i>    | 0.0268 |
| <i>ASNA1</i>       | 0.0268 |
| <i>GRAMD1B</i>     | 0.0271 |
| <i>TCRBV4S1A1T</i> | 0.0272 |
| <i>CLDND1</i>      | 0.0272 |
| <i>RNA28S5</i>     | 0.0273 |
| <i>AJ606316</i>    | 0.0273 |
| <i>SLC24A4</i>     | 0.0274 |
| <i>TTY6</i>        | 0.0275 |
| <i>AB306073</i>    | 0.0275 |
| <i>PHLDA2</i>      | 0.0276 |
| <i>CMTM2</i>       | 0.0276 |
| <i>AK124930</i>    | 0.0277 |
| <i>GPR65</i>       | 0.0278 |
| <i>NCOR1P1</i>     | 0.0278 |
| <i>TBC1D10C</i>    | 0.0279 |
| <i>DQ586658</i>    | 0.0279 |
| <i>MRPL53</i>      | 0.028  |
| <i>YIPF1</i>       | 0.028  |
| <i>ARID1A</i>      | 0.0281 |
| <i>DEFB132</i>     | 0.0281 |
| <i>JUN</i>         | 0.0281 |
| <i>BC094860</i>    | 0.0282 |
| <i>RASA4B</i>      | 0.0283 |
| <i>PLAT</i>        | 0.0283 |
| <i>GTF2A1L</i>     | 0.0283 |
| <i>TMEM179</i>     | 0.0283 |
| <i>TAF1C</i>       | 0.0283 |
| <i>HAX1</i>        | 0.0284 |
| <i>C5orf52</i>     | 0.0284 |
| <i>BC041879</i>    | 0.0284 |
| <i>CLRN3</i>       | 0.0285 |
| <i>DQ599939</i>    | 0.0286 |
| <i>HSF5</i>        | 0.0287 |
| <i>CABLES2</i>     | 0.0287 |
| <i>FBXL21</i>      | 0.0288 |
| <i>VKORC1L1</i>    | 0.0288 |
| <i>HLF</i>         | 0.0288 |

|                    |        |
|--------------------|--------|
| <i>IL10RA</i>      | 0.0288 |
| <i>DUSP2</i>       | 0.0288 |
| <i>SYCP1</i>       | 0.0289 |
| <i>RHOQ</i>        | 0.029  |
| <i>BX248253</i>    | 0.029  |
| <i>FLJ46284</i>    | 0.029  |
| <i>MIR3692</i>     | 0.0291 |
| <i>RP11-24P4.1</i> | 0.0292 |
| <i>SEPHS2</i>      | 0.0292 |
| <i>LAGE3</i>       | 0.0293 |
| <i>EVA1A</i>       | 0.0293 |
| <i>IZUMO4</i>      | 0.0294 |
| <i>MIR3607</i>     | 0.0296 |
| <i>PRB1</i>        | 0.0298 |
| <i>MIR301A</i>     | 0.0298 |
| <i>AK130329</i>    | 0.0298 |
| <i>SLC52A2</i>     | 0.0299 |
| <i>HSF2BP</i>      | 0.03   |
| <i>DOK4</i>        | 0.0302 |
| <i>KRBA2</i>       | 0.0304 |
| <i>FGF13-AS1</i>   | 0.0305 |
| <i>ASAH2</i>       | 0.0305 |
| <i>HSF4</i>        | 0.0306 |
| <i>AK093356</i>    | 0.0307 |
| <i>SCARNA5</i>     | 0.0308 |
| <i>AB305671</i>    | 0.0308 |
| <i>CYB5R4</i>      | 0.0309 |
| <i>PAPD7</i>       | 0.0309 |
| <i>OFD1</i>        | 0.031  |
| <i>HOXD8</i>       | 0.031  |
| <i>MIR590</i>      | 0.031  |
| <i>TNFRSF10D</i>   | 0.0311 |
| <i>KRT2</i>        | 0.0311 |
| <i>UBASH3A</i>     | 0.0311 |
| <i>LOC115110</i>   | 0.0312 |
| <i>CYB561</i>      | 0.0312 |
| <i>RNU4-2</i>      | 0.0312 |
| <i>AX775943</i>    | 0.0313 |
| <i>BC043356</i>    | 0.0313 |
| <i>ADORA2B</i>     | 0.0314 |
| <i>SP3</i>         | 0.0314 |

|                     |        |
|---------------------|--------|
| <i>UCHL1-AS1</i>    | 0.0315 |
| <i>LINC00552</i>    | 0.0316 |
| <i>MXD4</i>         | 0.0317 |
| <i>SIPR4</i>        | 0.0317 |
| <i>PAF1</i>         | 0.0317 |
| <i>TLR10</i>        | 0.0318 |
| <i>UG0898H09</i>    | 0.0318 |
| <i>ATP6V0E2</i>     | 0.0319 |
| <i>TAF10</i>        | 0.0319 |
| <i>GRK6</i>         | 0.032  |
| <i>HDDC3</i>        | 0.0322 |
| <i>WWC1</i>         | 0.0323 |
| <i>TCR+BV9</i>      | 0.0324 |
| <i>MIDN</i>         | 0.0324 |
| <i>ADCY9</i>        | 0.0324 |
| <i>CR627206</i>     | 0.0325 |
| <i>AF327297</i>     | 0.0326 |
| <i>PDLIM2</i>       | 0.0326 |
| <i>PTMS</i>         | 0.0327 |
| <i>LOC100130354</i> | 0.0327 |
| <i>MLANA</i>        | 0.0328 |
| <i>PWARSN</i>       | 0.0329 |
| <i>SERP1</i>        | 0.0331 |
| <i>SLC5A3</i>       | 0.0335 |
| <i>APBB1IP</i>      | 0.0335 |
| <i>EIF4B</i>        | 0.0335 |
| <i>KIR2DL4</i>      | 0.0336 |
| <i>ACTR1B</i>       | 0.0337 |
| <i>C4BPA</i>        | 0.0337 |
| <i>NDUFS6</i>       | 0.0337 |
| <i>AK124197</i>     | 0.0338 |
| <i>ORM2</i>         | 0.0339 |
| <i>ZNF214</i>       | 0.034  |
| <i>CHD1</i>         | 0.034  |
| <i>LMO4</i>         | 0.034  |
| <i>WASH1</i>        | 0.0342 |
| <i>CDKL4</i>        | 0.0342 |
| <i>EME2</i>         | 0.0343 |
| <i>FOXN3-AS1</i>    | 0.0344 |
| <i>GIT1</i>         | 0.0345 |
| <i>CD82</i>         | 0.0346 |

|                      |        |
|----------------------|--------|
| <i>IFT46</i>         | 0.0346 |
| <i>MFN1</i>          | 0.0346 |
| <i>PTGER3</i>        | 0.0346 |
| <i>BC032415</i>      | 0.0346 |
| <i>SNX18</i>         | 0.0347 |
| <i>C19orf24</i>      | 0.0348 |
| <i>ARL17A</i>        | 0.0349 |
| <i>TBC1D25</i>       | 0.0351 |
| <i>NDNF</i>          | 0.0352 |
| <i>B3GAT1</i>        | 0.0352 |
| <i>ESRP2</i>         | 0.0354 |
| <i>AK126744</i>      | 0.0355 |
| <i>LOC284454</i>     | 0.0356 |
| <i>DCAF8L2</i>       | 0.0357 |
| <i>PPP2R5C</i>       | 0.0358 |
| <i>KIF22</i>         | 0.0358 |
| <i>BX537783</i>      | 0.0359 |
| <i>ANKRD9</i>        | 0.036  |
| <i>FAM149A</i>       | 0.0362 |
| <i>HADH</i>          | 0.0363 |
| <i>C2orf74</i>       | 0.0364 |
| <i>C21orf2</i>       | 0.0364 |
| <i>TCRBV17S1A1T</i>  | 0.0364 |
| <i>FSHR</i>          | 0.0364 |
| <i>AIP</i>           | 0.0364 |
| <i>RTN2</i>          | 0.0365 |
| <i>C11orf80</i>      | 0.0366 |
| <i>CMTM8</i>         | 0.0366 |
| <i>PWWP2B</i>        | 0.0366 |
| <i>MIR4741</i>       | 0.0366 |
| <i>UBN1</i>          | 0.0367 |
| <i>SEPT9</i>         | 0.0367 |
| <i>EFHC1</i>         | 0.0367 |
| <i>ULK3</i>          | 0.0367 |
| <i>AK302451</i>      | 0.0369 |
| <i>C17orf107</i>     | 0.037  |
| <i>PTPN13</i>        | 0.0371 |
| <i>FOXJ1</i>         | 0.0371 |
| <i>DKFZp779K0112</i> | 0.0371 |
| <i>LOC100287704</i>  | 0.0371 |
| <i>BC131596</i>      | 0.0371 |



|                     |        |
|---------------------|--------|
| <i>LOC100093631</i> | 0.0373 |
| <i>ZNF667</i>       | 0.0374 |
| <i>REXO1</i>        | 0.0374 |
| <i>MBD1</i>         | 0.0375 |
| <i>CCDC78</i>       | 0.0375 |
| <i>AK055364</i>     | 0.0376 |
| <i>NT5C2</i>        | 0.0376 |
| <i>SOWAHD</i>       | 0.0377 |
| <i>ATAD3C</i>       | 0.0377 |
| <i>GFER</i>         | 0.0377 |
| <i>LAMP1</i>        | 0.0378 |
| <i>SIRT4</i>        | 0.0381 |
| <i>PLCB2</i>        | 0.0382 |
| <i>ACAA1</i>        | 0.0384 |
| <i>FAM181A-AS1</i>  | 0.0384 |
| <i>NUDC</i>         | 0.0385 |
| <i>OSM</i>          | 0.0385 |
| <i>LINC00601</i>    | 0.0386 |
| <i>GABRG2</i>       | 0.0386 |
| <i>CYP2E1</i>       | 0.0386 |
| <i>SPDYE3</i>       | 0.0386 |
| <i>PRC1-AS1</i>     | 0.0387 |
| <i>DNTT</i>         | 0.0387 |
| <i>MSL3</i>         | 0.0387 |
| <i>ZNF429</i>       | 0.0388 |
| <i>ASTN2</i>        | 0.0388 |
| <i>ZNF282</i>       | 0.039  |
| <i>ADAM5</i>        | 0.039  |
| <i>CASP1</i>        | 0.0391 |
| <i>SCAMP1</i>       | 0.0391 |
| <i>HMHB1</i>        | 0.0392 |
| <i>ACBD3</i>        | 0.0392 |
| <i>KLRF1</i>        | 0.0394 |
| <i>MRPL1</i>        | 0.0394 |
| <i>AC007038.7</i>   | 0.0394 |
| <i>EFCAB14</i>      | 0.0394 |
| <i>CR627148</i>     | 0.0394 |
| <i>LOC100288778</i> | 0.0398 |
| <i>AK307061</i>     | 0.0398 |
| <i>KIAA1549</i>     | 0.0399 |
| <i>MROH7</i>        | 0.0399 |

|                     |        |
|---------------------|--------|
| <i>PTGER4</i>       | 0.0401 |
| <i>HSPE1-MOB4</i>   | 0.0401 |
| <i>SLCO2A1</i>      | 0.0401 |
| <i>PPDPF</i>        | 0.0402 |
| <i>GPBAR1</i>       | 0.0402 |
| <i>GULP1</i>        | 0.0402 |
| <i>TMEM14E</i>      | 0.0403 |
| <i>PRR22</i>        | 0.0404 |
| <i>SCD5</i>         | 0.0404 |
| <i>HSPB9</i>        | 0.0404 |
| <i>AK056623</i>     | 0.0404 |
| <i>NPIP3</i>        | 0.0405 |
| <i>ASCC3</i>        | 0.0405 |
| <i>C12orf5</i>      | 0.0407 |
| <i>YKT6</i>         | 0.0409 |
| <i>PDE1B</i>        | 0.041  |
| <i>LINC00161</i>    | 0.0411 |
| <i>STOX2</i>        | 0.0411 |
| <i>DQ581019</i>     | 0.0412 |
| <i>FAM138A</i>      | 0.0413 |
| <i>LOC100630918</i> | 0.0413 |
| <i>CHODL</i>        | 0.0414 |
| <i>CYTIP</i>        | 0.0415 |
| <i>SAMD9L</i>       | 0.0418 |
| <i>HOOK1</i>        | 0.0419 |
| <i>AX748270</i>     | 0.0419 |
| <i>RALGPS2</i>      | 0.0419 |
| <i>EDN3</i>         | 0.042  |
| <i>SMAGP</i>        | 0.042  |
| <i>INSL3</i>        | 0.0421 |
| <i>AX747935</i>     | 0.0421 |
| <i>MLLT1</i>        | 0.0421 |
| <i>OR4F17</i>       | 0.0423 |
| <i>BC067230</i>     | 0.0424 |
| <i>NR4A2</i>        | 0.0424 |
| <i>RPL41</i>        | 0.0425 |
| <i>TMEM196</i>      | 0.0427 |
| <i>hADV29S1</i>     | 0.0428 |
| <i>TRIM52-AS1</i>   | 0.0428 |
| <i>BC036830</i>     | 0.0429 |
| <i>GRHL3</i>        | 0.0431 |

|                     |        |
|---------------------|--------|
| <i>LOC339166</i>    | 0.0431 |
| <i>TSPAN32</i>      | 0.0431 |
| <i>MMAB</i>         | 0.0431 |
| <i>SYT5</i>         | 0.0433 |
| <i>EIF4ENIF1</i>    | 0.0434 |
| <i>GCKR</i>         | 0.0435 |
| <i>REXO4</i>        | 0.0435 |
| <i>TPTE2P1</i>      | 0.0436 |
| <i>TMEM41B</i>      | 0.0439 |
| <i>FAM109A</i>      | 0.0439 |
| <i>SAMSN1</i>       | 0.0441 |
| <i>ANKRD32</i>      | 0.0442 |
| <i>CBLN2</i>        | 0.0443 |
| <i>PKD2L1</i>       | 0.0443 |
| <i>SEPT3</i>        | 0.0443 |
| <i>SLC2A4RG</i>     | 0.0444 |
| <i>MGC57346</i>     | 0.0445 |
| <i>TRBV4-2</i>      | 0.0445 |
| <i>AK126852</i>     | 0.0445 |
| <i>MIR548AM</i>     | 0.0446 |
| <i>SNORA37</i>      | 0.0446 |
| <i>RRAS</i>         | 0.0448 |
| <i>LOC101927697</i> | 0.0448 |
| <i>FBXL15</i>       | 0.045  |
| <i>FAM197Y2</i>     | 0.0451 |
| <i>LINC00476</i>    | 0.0453 |
| <i>TLR9</i>         | 0.0453 |
| <i>UBALD2</i>       | 0.0453 |
| <i>ASXL2</i>        | 0.0456 |
| <i>LOC644189</i>    | 0.0456 |
| <i>IL18R1</i>       | 0.0456 |
| <i>BAGE3</i>        | 0.0457 |
| <i>MYO1E</i>        | 0.0457 |
| <i>VMP1</i>         | 0.0457 |
| <i>TMEM8A</i>       | 0.0458 |
| <i>GTF2F1</i>       | 0.0458 |
| <i>SMC3</i>         | 0.0458 |
| <i>TRIM54</i>       | 0.0459 |
| <i>pp8961</i>       | 0.0459 |
| <i>SPINK4</i>       | 0.0459 |
| <i>KCNC3</i>        | 0.0459 |

|                     |        |
|---------------------|--------|
| <i>CHDH</i>         | 0.046  |
| <i>BC110795</i>     | 0.0461 |
| <i>P2RY10</i>       | 0.0461 |
| <i>HP</i>           | 0.0463 |
| <i>BMP8B</i>        | 0.0463 |
| <i>CEACAM7</i>      | 0.0464 |
| <i>CAB39</i>        | 0.0464 |
| <i>NUDT16P1</i>     | 0.0465 |
| <i>NPDC1</i>        | 0.0465 |
| <i>UTRN</i>         | 0.0465 |
| <i>SLC51B</i>       | 0.0466 |
| <i>ADAMTS7P1</i>    | 0.0466 |
| <i>PPIG</i>         | 0.0468 |
| <i>CYCS</i>         | 0.047  |
| <i>RFWD3</i>        | 0.0471 |
| <i>CITED2</i>       | 0.0472 |
| <i>SCARA3</i>       | 0.0473 |
| <i>ZNF773</i>       | 0.0473 |
| <i>IL6R</i>         | 0.0473 |
| <i>TMEM69</i>       | 0.0474 |
| <i>PDE4C</i>        | 0.0475 |
| <i>GLT8D2</i>       | 0.0475 |
| <i>MIR548X2</i>     | 0.0477 |
| <i>PELP1</i>        | 0.0478 |
| <i>BC043293</i>     | 0.0479 |
| <i>ZAK</i>          | 0.0479 |
| <i>AF086102</i>     | 0.048  |
| <i>SLC38A9</i>      | 0.048  |
| <i>MED24</i>        | 0.048  |
| <i>SGOL1-AS1</i>    | 0.0481 |
| <i>IFI16</i>        | 0.0482 |
| <i>C2CD4D</i>       | 0.0482 |
| <i>AC113607.2</i>   | 0.0484 |
| <i>SLC8A1-AS1</i>   | 0.0485 |
| <i>RPS6KA5</i>      | 0.0486 |
| <i>UBXN2B</i>       | 0.0486 |
| <i>ABCD1</i>        | 0.0487 |
| <i>USP33</i>        | 0.0488 |
| <i>RP5-115904.2</i> | 0.0488 |
| <i>R3HDM4</i>       | 0.0489 |
| <i>LPPR3</i>        | 0.0491 |

|                   |        |
|-------------------|--------|
| <i>TAS2R4</i>     | 0.0493 |
| <i>ZNF567</i>     | 0.0495 |
| <i>SPATA3-AS1</i> | 0.0495 |
| <i>ETAA1</i>      | 0.0496 |
| <i>ARHGEF15</i>   | 0.0496 |
| <i>PAAF1</i>      | 0.0496 |
| <i>HSPAIL</i>     | 0.0497 |
| <i>MPST</i>       | 0.0497 |
| <i>SCO2</i>       | 0.0498 |
| <i>CDCA7L</i>     | 0.0499 |

## **Supplemental Materials and Methods**

**Patient inclusion.** With the overall goal of targeting normal controls and active EoE subjects, biopsies and blood samples were acquired at the Allergy and Gastroenterology outpatient clinics (Cincinnati Children's Hospital Medical Center [CCHMC]) systemically from patients who were having an endoscopy for EoE or related symptoms. EoE was defined by a histological finding of  $\geq 15$  eosinophils per microscopic high-power field (HPF) with clinical symptoms and a failed proton pump inhibitor (PPI) trial. EoE remission (inactive EoE control) was defined as any patient (with EoE history) whose tissue eosinophil count was  $< 15$  eosinophils/HPF. Normal controls were defined as patients without history of EoE and a negative endoscopy with 0 eosinophils/HPF. The normal control were those patients with gastrointestinal symptoms without EoE history and were found to have a completely negative endoscopy and biopsy histology.

**Surface phenotype FACS analyses.** The pellet was carefully re-suspended in 50-100  $\mu$ L FACS buffer (0.5% BSA, 0.1%NaN<sub>3</sub> in PBS). FACS staining was performed following the manufacturer's suggested protocol. The cell suspension was stained on ice for 30 minutes in the dark, washed by ice-cold PBS once, reconstituted in 80-100  $\mu$ L FACS buffer, and kept on ice before the immediate FACS analysis. Five-color FACS analysis was performed with a FACS CANTO III (Becton, Dickinson and Company) equipped with 405-nm, 488-nm, and 633-nm excitation lasers. The FACS data were analyzed by the FACS Diva software (Becton, Dickinson and Company) and FlowJo software to enumerate and phenotype each cell population of interest.

**Bulk RNA-seq on CD3-sorted blood and tissue lymphocytes.** Single-cell suspensions were made from freshly obtained biopsies as described above. Autologous circulating blood samples (collected in heparin

tubes) were processed for PBMC with ficoll sedimentation. Blood and tissue samples were stained for CD3 (HIT3a)-AF647, CD45 (2D1)-APC-H7, and Zombie Violet viability dyes and subjected to a 3 color FACS sorting by a MoFlo XDP machine (Beckman Coulter) under BSL2 conditions at the Research Flow Cytometry Core of CCHMC. Blood and tissue T cell events were logically defined as  $FSC_{low}SSC_{low}CD45^{+}CD3^{+}$  live singlet events. T cells were sorted into RPMI1640 supplemented with 10% FCS to confirm the presence of a visible pellet before lysing for RNA extraction (Qiagen #74104 RNeasy Mini Kit). The initial cDNA amplification step for all samples was performed at CCHMC RNA Expression Core with the NuGEN Ovation RNA-Seq System v2 Assay, which contains both random hexamers and the Oligo dT primer. The Nextera XT DNA Sample Preparation Kit (Illumina) was used to create the cDNA libraries, which were subsequently processed by the CCHMC DNA Core for RNA-seq at 30M read depth, 75 bp x 2 pair-ended NGS by Illumina's HiSeq 2500 machine. Raw reads were aligned to hg19 annotation (GRCh37/hg19) and the subsequent quantification and analysis were performed using the Strand NGS software (Agilent Inc.).

**scRNA-seq platform (C1 Fluidigm).** Single-cell suspensions were generated from biopsies, and FACS staining for T cells were performed the same as described above. Tissue T cells, defined as  $FSC^{low}SSC_{low}CD45^{+}CD3^{+}$  live singlet events, were sorted by MoFlo X machine. Three biopsies collected from the distal esophagus typically yielded ~2,500-10,000 T cells, which were subsequently adjusted to 300 cells/ $\mu$ L and loaded onto the Fluidigm® C1™ 5-10- $\mu$ m chip designed to capture small-diameter leukocytes such as lymphocytes. Fluidigm® C1™ capture was robotically performed at the CCHMC Gene Expression Core, and all T cells loaded on the micro-chamber chip were manually examined with a dissecting microscope to ensure single-cell capture of live events of the expected size without debris contamination. Multiple-cell capture, dead/late apoptotic events, clogged chamber, debris/empty

chambers were removed from the final analysis by expunging their chamber ID from the final analysis. The overall capture rate during the C1 project averaged around 70% (single-cell capture with satisfactory cDNA yield). Single-cell reverse transcription and cDNA libraries were robotically generated with the SMARTer® Ultra® Low RNA Kit for the Fluidigm® C1™ System (CloneTech) designed to enrich in poly-A transcript without any reading bias regarding 5' or 3' ends. Each single cell was assigned a unique barcode for a series of pulled NGS targeting at 2M read depth per cell in a 75-bp x2 pair-ended fashion. Raw reads were aligned to hg19 annotation. The TCR sequences were extracted from the same library on which the rest of the analyses relied. The entire NGS data generated during the study will be available in a public repository upon publication.

**Single-cell RNA sequencing quality control.** All NGS datasets discussed herein were sequenced by Illumina HiSeq 2500 system. For C1 Fluidigm single-cell system, 2M pair-ended reads (4M both directions) is the targeted read depth. In reality, we obtained  $1.8M \pm 0.5M$  (1SD) reads per cell on average. During the C1 acquisition period, we excluded doublets and erroneous/anomalous/suspicious events as below:

- a. Under an inverted phase-contrast microscope, we manually evaluated each cell chamber, cell by cell, after C1 capture, for the presence of live or dead cells, levels of debris, and singlet selection. A consensus amongst two reviewers was needed to proceed to cDNA library generation for each particular cell. Our consensus rate was > 98% and QC dropout rate was about 30%. The C1 system uniquely offers the opportunity to do this as compared to other higher-throughput systems, part of the reason we chose it.
- b. With 1 year of pilot experiments, we optimized the C1 system by using their small cell capture fluidic chip aiming to capture cells of 7-10  $\mu$ M in diameter. We found that the small sized chip yielded the highest chamber capture rate and the lowest dropout rate.



c. Finally, we also used bioinformatic approaches to screen for anomalous RNA composition at single cell level. We only identified one cell suspected to be a doublet, demonstrating the success of our manual microscopic screening in a.

**Murine and human CD4 T cell purification.** Murine splenic CD4<sup>+</sup> T cells were purified using CD4<sup>+</sup> beads (Miltenyi Biotec) and activated with 5 µg/ml plate-bound anti-CD3 and 2 µg/ml soluble anti-CD28 in the presence of 10 µg/ml soluble anti-IFN-γ and/or anti-IL-4 (10 µg/ml). Each of these antibodies were obtained from BioXcell. CD4<sup>+</sup> T cells were additionally stimulated with C4 (0.4 mM) in the presence or absence of IL-4 (20 ng/ml) (PeproTech). Human T helper cells were isolated by Ficoll gradient centrifugation and then purified using CD4<sup>+</sup> T cell isolation kits (Miltenyi Biotec) from whole blood of healthy or EoE donors. Purified cells (95-98% purity) were activated with 5 µg/ml soluble anti-CD3, 2 µg/ml anti-CD28 (BioXcell), and 5 µg/ml anti-IFN-γ (BioLegend) in the presence or absence of anti-IL-4 (5 µg/ml, BioLegend), IL-4 (40 ng/ml) (PeproTech), or C4 (0.1 or 0.4 mM, SIGMA)

**Murine and human Th2 cytokine intracellular FACS staining.** For intracellular staining of cytokines, murine CD4<sup>+</sup> T cells and human PBMC were stimulated with 500 ng/ml PDBU (Sigma), 1 µM ionomycin (Sigma) and BrefeldinA (eBioscience) for 4 (murine) and 5.5 (human) hours. In this substudy, some normal controls (< 2 eosinophils/HPF) had a history of EoE. Harvested cells were fixed and permeabilized using Cytofix/Cytoperm kit (BD Biosciences) and stained with anti-murine or anti-human antibodies PE-anti-IL-5 (BioLegend), APC-anti-IL-4 (BioLegend), eFluor450-anti-IL-13 (eBioscience), BV711-anti-IFN-γ (BioLegend), BV510-anti-TNFα (BioLegend), and PerCP-anti-IL-2 (BioLegend). Human PBMC also were stained with FITC-anti-CD3, APC-Cy7-anti-CD4, and AF700-anti-CD8 (all from BioLegend).

For detailed clone and vender catalog information of the FACS antibodies used, see table below:

| FACS Antibodies    | Reactivity | Vender         | Clone      | Catalog # | Application |
|--------------------|------------|----------------|------------|-----------|-------------|
| APC/Cy7-CD4        | mouse      | Biologend      | GK1.5      | 100414    | ICS         |
| FITC-CD44          | mouse      | Biologend      | IM7        | 103006    | ICS         |
| PE-IL-5            | mouse      | eBioscience    | TRFK5      | 12-7052   | ICS         |
| APC-IL-4           | mouse      | eBioscience    | 11N11      | 17-7041   | ICS         |
| eFluor450-IL-13    | mouse      | eBioscience    | eBio13A    | 48-7133   | ICS         |
| BV711-IFN $\gamma$ | mouse      | Biologend      | XMG1.2     | 505835    | ICS         |
| BV510-TNF $\alpha$ | mouse      | Biologend      | MP6-XT22   | 506339    | ICS         |
| PerCP/Cy5.5-IL-2   | mouse      | Biologend      | JES6-5H4   | 503822    | ICS         |
| BV510-CD4          | mouse      | Biologend      | RM4-5      | 100553    | live        |
| AF700-CD44         | mouse      | Biologend      | IM7        | 103026    | live        |
|                    |            |                |            |           |             |
| FITC-CD3           | human      | Biologend      | UCHT1      | 561806    | ICS         |
| APC/Cy7-CD4        | human      | Biologend      | SK3        | 344615    | ICS         |
| AF700-CD8a         | human      | Biologend      | HIT8a      | 300920    | ICS         |
| PE-IL-5            | human      | Biologend      | JES1-39D10 | 500903    | ICS         |
| APC-IL-4           | human      | Biologend      | MP4-25D2   | 500811    | ICS         |
| BV421-IL-13        | human      | BD Biosciences | JES10-5A2  | 563580    | ICS         |
| BV510-IFN $\gamma$ | human      | Biologend      | 4S.B3      | 502543    | ICS         |
| BV711-TNF $\alpha$ | human      | Biologend      | MAb11      | 502939    | ICS         |
| PerCP/Cy5.5-IL-2   | human      | Biologend      | MQ1-17H12  | 500321    | ICS         |
| PE/Dazzle594-IL-10 | human      | Biologend      | JES3-19F1  | 506811    | ICS         |
| PE-GATA3           | human      | eBioscience    | TWAJ       | 12-9966   | ICS         |
| APC-FOXP3          | human      | eBioscience    | PCH101     | 17-4776   | ICS         |

ICS, intracellular cytokine staining; live, live surface staining.

**Experimental asthma model.** A bolus of 100  $\mu$ g aspergillus fumigatus (GREER, Lenoir, NC) was dissolved in sterile saline and administered intranasally every other day into IL4-eGFP reporter mice (BALB/c, a gift from Dr. Yui-Hsi Wang) in the presence and absence of 1 mg sodium butyrate co-administrated; a total of five challenges were given, and the animals were sacrificed 48 hours after the last challenge. Lung tissue and bronchoalveolar lavage fluid (BALF) were subjected to Th2 cytokine analyses

at mRNA and protein levels, respectively; and WBC differential count were derived from total BALF cells by conventional Cytospin and Diff-Quik histologic procedures. All rodent animal studies complied with Institutional Animal Care and Use Committee-approved protocols at CCHMC.

**Tissue lymphocyte development path analysis by SPADE.** Following the originator's recommended protocol(2, 3), SPADE (Spanning-tree Progression Analysis of Density-normalized Events) was employed to computationally identify T cell sub-populations from multidimensional intracellular cytokine FACS dataset obtained from the diseased tissue. ~50,000 CD3+ tissue T cells were pooled from 12 EoE individuals for the collective SPADE analysis on active tissue T cells. On the basis of the cytokines of interest, SPADE identifies development stage nodes and individual populations and then projects their expression pattern and level onto a tree, which was auto-annotated by the first-degree CD8 differential expression dividing the T cell population into CD8+ and CD4+ for further analyses.

#### **Miscellaneous bioinformatic methodology.**

The T8 clustering was determined by unsupervised PCA analyses summarized in Fig. S4A chart. Briefly, 1114 PCA variation-contributing genes (Table S6) were identified and cells were categorized on the differential expression of these genes, resulting in 8 major clusters. The best heat diagram focusing on the T1-T8 difference is exhibited in Fig. S4B.

Gene ontology and pathway analysis were carried out by the Fisher-test-based GENEONTOLOGY modules publicly available at [www.pantherdb.org](http://www.pantherdb.org). In some cases, the functional node selection for radar map was supervised by biological relevance and significance. Clinical correlation was performed on per-subject basis. For any given gene, an average RPKM was first derived from all cells isolated from that

patient, and then this value was correlated with the eosinophil count for that subject. Pearson correlation was used, and corresponding FDR-adjusted p values were used for screening.

Protein-protein interaction network was performed by STRING – Multiple-proteins modules as available at <https://string-db.org>. In the transcription factor analysis, the averaging heatmap was generated by taking an average value of the Log<sub>2</sub> normalized values for any given T clusters, and relative heatmapping was adopted to apply the full color scale to each entity row.

The radar scanning map depicts specifically categorized activities of T1-T8 based on closeness to major relevant T cell functional modules, namely tissue Th2 properties, T<sub>REG</sub> activity, T cell chemotaxis factors (migration), and CD8<sup>+</sup> cytotoxic T cell activity. For each T cluster, the radar polar coordination axis delineates the logarithmic expression levels; the encircled area under the curve indicates the activity index in each activity module.

The 2D-TRACER analysis on Th2 cytokine source was performed by Graph Maker in 2D space (<https://plot.ly/create/>). CD4 and CD8A RPKMs were log-plotted on the x and y axis, respectively; and those Th2 cytokine-positive events were color-coded red with the diameter of the surrounding halo representing their specific cytokine expression RPKM values.

**Statistical overview.** The investigators were blinded to the group allocation during the experiment. Simple statistical analyses were performed using GraphPad Prism software. A 2-tailed student t-test was used for 2-group comparisons with regression analyses performed by the Pearson or Spearman method depending on parametric features. One-way or two-way ANOVA was employed to compare more than two groups with Bonferroni post-test used for specific group pair comparison. Statistical significance was defined by a 2-tailed p value < 0.05.

## References:

1. Hirota K, Duarte JH, Veldhoen M, Hornsby E, Li Y, Cua DJ, Ahlfors H, Wilhelm C, Tolaini M, Menzel U, et al. Fate mapping of IL-17-producing T cells in inflammatory responses. *Nat Immunol.* 2011;12(3):255-63.
2. Qiu P, Simonds EF, Bendall SC, Gibbs KD, Jr., Bruggner RV, Linderman MD, Sachs K, Nolan GP, and Plevritis SK. Extracting a cellular hierarchy from high-dimensional cytometry data with SPADE. *Nat Biotechnol.* 2011;29(10):886-91.
3. Qiu P. Inferring phenotypic properties from single-cell characteristics. *PLoS One.* 2012;7(5):e37038.
